# Supplementary material for: Terpenoids of plants from Chloranthaceae family: chemistry, bioactivity, and synthesis
Source: Royal Society of Chemistry journal article supplement (doi:10.1039/d4np00005f), 2024-01-01
Supplement: d4np00005f1.pdf [file d4np00005f1.pdf]

*Supporting Information for*

**Terpenoids of plants from family Chloranthaceae:  
chemistry, bioactivity, and synthesis**

Bin Zhou and Jian-Min Yue\*

State Key Laboratory of Drug Research, Shanghai Institute of Materia Medica, Chinese Academy of Sciences, 555 Zuchongzhi Road, Shanghai 201203, People's Republic of China.

E-mail: [jmyue@simm.ac.cn](mailto:jmyue@simm.ac.cn); Tel.: +86-21-68077967.

# Content

|                                                                                                                                        |     |
|----------------------------------------------------------------------------------------------------------------------------------------|-----|
| Table S1. <i>P. falciparum</i> growth inhibition and mammalian cytotoxicity for compounds 289–343.....                                 | 1   |
| Table S2. Classification, source, bioactivity, synthesis, and structures of 682 terpenoids identified from Chloranthaceae plants ..... | 2   |
| I. Monoterpenoids (1–8) and triterpenoids (9–13).....                                                                                  | 2   |
| II. Sesquiterpenoids (14–288) .....                                                                                                    | 4   |
| II-a. Lindenane-type sesquiterpenoids (14–69).....                                                                                     | 4   |
| II-b. Eudesmane-type sesquiterpenoids (70–177).....                                                                                    | 14  |
| II-c. Guaiane-type sesquiterpenoids (178–204).....                                                                                     | 31  |
| II-d. Germacrane-type sesquiterpenoids (205–227) .....                                                                                 | 37  |
| II-e. Cadinane-type sesquiterpenoids (228–247).....                                                                                    | 41  |
| II-f. Elemene-type sesquiterpenoids (248–255).....                                                                                     | 44  |
| II-g. Eremophilane-type sesquiterpenoids (256–266).....                                                                                | 46  |
| II-h. Monocyclofarnesane-type sesquiterpenoids (267–274) .....                                                                         | 48  |
| II-i. Aromadendrane-type sesquiterpenoids (275–281).....                                                                               | 49  |
| II-j. Drimane-type sesquiterpenoids (282–283) .....                                                                                    | 50  |
| II-k. Isodaucane-type sesquiterpenoid (284).....                                                                                       | 51  |
| II-l. Oplopanane-type sesquiterpenoid (285) .....                                                                                      | 51  |
| II-m. Brasilane-type sesquiterpenoid (286).....                                                                                        | 51  |
| II-n. Acorane-type sesquiterpenoid (287).....                                                                                          | 52  |
| II-o. Maaliane-type sesquiterpenoid (288) .....                                                                                        | 52  |
| III. Sesquiterpenoid oligomers (289–531).....                                                                                          | 52  |
| III-a. Dimeric lindnane sesquiterpenoids (289–495) .....                                                                               | 52  |
| III-a1. [4 + 2]-Cycloaddition type (289–473).....                                                                                      | 52  |
| III-a2. [6 + 6]-Cycloaddition type (474–482).....                                                                                      | 114 |
| III-a3. [2 + 2]-Cycloaddition type (483–486).....                                                                                      | 117 |
| III-a4. [6 + 6] and [2 + 2]-Cycloaddition type (487–488).....                                                                          | 118 |
| III-a5. Linear-type (489–495) .....                                                                                                    | 119 |
| III-b. Lindenane hetero dimers (496–438) .....                                                                                         | 121 |
| III-b1. Lindenane-guaiane sesquiterpenoid dimers (496–498).....                                                                        | 121 |
| III-b2. Lindenane-acrane sesquiterpenoid dimers (499–500).....                                                                         | 122 |
| III-b3. Lindenane-eudesmane sesquiterpenoid dimer (501).....                                                                           | 122 |

|                                                                                                    |     |
|----------------------------------------------------------------------------------------------------|-----|
| <b>III-b4. Lindenane-aromadendrane sesquiterpenoid dimer (502)</b> .....                           | 122 |
| <b>III-c. Dimeric eudesmane sesquiterpenoids (503–512)</b> .....                                   | 123 |
| <b>III-d. Eudesmane-eremophilane sesquiterpenoid dimer (513)</b> .....                             | 125 |
| <b>III-e. Dimeric eremophilane sesquiterpenoid (514)</b> .....                                     | 126 |
| <b>III-f. Dimeric guaiane sesquiterpenoid (515)</b> .....                                          | 126 |
| <b>III-g. Eudesmane-guaiane sesquiterpenoid dimer (516)</b> .....                                  | 126 |
| <b>III-h. Eudesmane-elemanane sesquiterpenoid dimers (517–518)</b> .....                           | 127 |
| <b>III-i. Trimeric sesquiterpenoids (519–531)</b> .....                                            | 127 |
| <b>IV. Diterpenoids (532–620)</b> .....                                                            | 131 |
| <b>IV-a. Abietane-type diterpenoids (532–558)</b> .....                                            | 131 |
| <b>IV-b. 13,14-Secoabietane-type diterpenoids (559–564)</b> .....                                  | 136 |
| <b>IV-c. 14-Norabietane-type diterpenoids (565–566)</b> .....                                      | 138 |
| <b>IV-d. 7,8-Secoabietane-type diterpenoids (567)</b> .....                                        | 138 |
| <b>IV-e. 10(9→8)-Abeoabietane-type diterpenoids (568–569)</b> .....                                | 139 |
| <b>IV-f. 14(13→12)-Abeoabietane-type diterpenoids (570–571)</b> .....                              | 139 |
| <b>IV-g. Labdane-type diterpenoids (572–595)</b> .....                                             | 140 |
| <b>IV-h. 15-Norlabdane-type diterpenoids (596–597)</b> .....                                       | 146 |
| <b>IV-i. 14,15-Dinorlabdane-type diterpenoids (598–599)</b> .....                                  | 147 |
| <b>IV-j. Pimarane-type diterpenoids (600–603)</b> .....                                            | 147 |
| <b>IV-k. Kaurane-type diterpenoids (604–612)</b> .....                                             | 148 |
| <b>IV-l. Torarane-type diterpenoids (613)</b> .....                                                | 149 |
| <b>IV-m. 9,11-Secochinane-type diterpenoids (614)</b> .....                                        | 150 |
| <b>IV-n. Podocarpane-type diterpenoids (615–617)</b> .....                                         | 150 |
| <b>IV-o. Abietane-phloroglucinol adducts (618–620)</b> .....                                       | 150 |
| <b>V. Sesquiterpenoid-monoterpenoid heterodimers (621–643)</b> .....                               | 151 |
| <b>VI. Meroterpenoids (644–682)</b> .....                                                          | 157 |
| <b>Fig. S1 Monoterpenoids (1–8) and triterpenoids (9–13) identified from Chloranthaceae.</b> ..... | 167 |
| <b>Fig. S2 Lindenane sesquiterpenoids (14–69) identified from Chloranthaceae.</b> .....            | 168 |
| <b>Fig. S3 Eudesmane sesquiterpenoids (70–177) identified from Chloranthaceae.</b> .....           | 170 |
| <b>Fig. S4 Guaiane sesquiterpenoids (178–204) identified from Chloranthaceae.</b> .....            | 171 |
| <b>Fig. S5 Germacrane sesquiterpenoids (205–227) identified from Chloranthaceae.</b> .....         | 172 |
| <b>Fig. S6 Other type sesquiterpenoids (228–288) identified from Chloranthaceae.</b> .....         | 173 |

|                                                                                                                                                    |     |
|----------------------------------------------------------------------------------------------------------------------------------------------------|-----|
| <b>Fig. S7</b> Dimeric lindnane Sesquiterpenoids ( <b>289–495</b> ) identified from Chloranthaceae.....                                            | 177 |
| <b>Fig. S8</b> Lindenane hetero dimers ( <b>496–502</b> ) and other sesquiterpenoid dimers ( <b>503–518</b> ) identified from Chloranthaceae. .... | 178 |
| <b>Fig. S9</b> Trimeric sesquiterpenoids ( <b>519–531</b> ) identified from Chloranthaceae .....                                                   | 179 |
| <b>Fig. S10</b> Diterpenoids ( <b>532–620</b> ) identified from Chloranthaceae. ....                                                               | 181 |
| <b>Fig. S11</b> Sesquiterpenoid-monoterpenoid heterodimers ( <b>621–643</b> ) identified from Chloranthaceae.....                                  | 182 |
| <b>Fig. S12</b> Meroterpenoids ( <b>644–682</b> ) identified from Chloranthaceae.....                                                              | 183 |
| <b>References</b> .....                                                                                                                            | 184 |

**Table S1. *P. falciparum* growth inhibition and mammalian cytotoxicity for compounds 289–343**

| <b>Compound no.</b> | <b><i>P. falciparum</i> EC<sub>50</sub> ± SD (nM)</b> | <b>WI-38 IC<sub>50</sub> (μM)</b> | <b>Compound no.</b>      | <b><i>P. falciparum</i> EC<sub>50</sub> ± SD (nM)</b> | <b>WI-38 IC<sub>50</sub> (μM)</b> |
|---------------------|-------------------------------------------------------|-----------------------------------|--------------------------|-------------------------------------------------------|-----------------------------------|
| <b>289</b>          | 5.2 ± 0.6                                             | 8.84                              | <b>317</b>               | 1.1 ± 0.2                                             | 5.39                              |
| <b>290</b>          | 19 ± 8                                                | 3.09                              | <b>318</b>               | 13 ± 3                                                | 0.16                              |
| <b>291</b>          | 211 ± 56                                              | NT <sup>a</sup>                   | <b>319</b>               | 100 ± 10                                              | 10.04                             |
| <b>292</b>          | 30 ± 8                                                | 0.53                              | <b>300</b>               | 265 ± 5                                               | NT                                |
| <b>293</b>          | 43 ± 3                                                | >100                              | <b>321</b>               | 320 ± 130                                             | NT                                |
| <b>294</b>          | 5300 ± 2000                                           | NT                                | <b>322</b>               | 11400 ± 1600                                          | NT                                |
| <b>295</b>          | 46 ± 3                                                | 1.24                              | <b>323</b>               | 1800 ± 400                                            | NT                                |
| <b>296</b>          | 198 ± 22                                              | NT                                | <b>324</b>               | 580 ± 90                                              | NT                                |
| <b>297</b>          | 94 ± 30                                               | NT                                | <b>325</b>               | 11 ± 1                                                | 0.23                              |
| <b>298</b>          | 9900 ± 2700                                           | NT                                | <b>326</b>               | 13 ± 1                                                | 1.74                              |
| <b>299</b>          | 4700 ± 500                                            | NT                                | <b>327</b>               | 27 ± 3                                                | 16.7                              |
| <b>300</b>          | 99 ± 18                                               | 15.5                              | <b>328</b>               | 474 ± 12                                              | NT                                |
| <b>301</b>          | 10200 ± 370                                           | NT                                | <b>329</b>               | 1500 ± 300                                            | NT                                |
| <b>302</b>          | 495 ± 11                                              | NT                                | <b>330</b>               | 7100 ± 1000                                           | NT                                |
| <b>303</b>          | NT                                                    | NT                                | <b>331</b>               | > 2000                                                | NT                                |
| <b>304</b>          | 1500 ± 12                                             | NT                                | <b>332</b>               | > 2000                                                | NT                                |
| <b>305</b>          | NT                                                    | NT                                | <b>333</b>               | 9.7 ± 1.3                                             | NT                                |
| <b>306</b>          | 0.0043 ± 0.0003                                       | 39.0                              | <b>334</b>               | 102 ± 8                                               | NT                                |
| <b>307</b>          | 36 ± 8                                                | NT                                | <b>335</b>               | > 25000                                               | NT                                |
| <b>308</b>          | 85 ± 1                                                | NT                                | <b>336</b>               | > 25000                                               | NT                                |
| <b>309</b>          | 60 ± 10                                               | NT                                | <b>337</b>               | > 25000                                               | NT                                |
| <b>290</b>          | > 2000                                                | NT                                | <b>338</b>               | > 25000                                               | NT                                |
| <b>311</b>          | 4600 ± 200                                            | NT                                | <b>339</b>               | > 25000                                               | NT                                |
| <b>312</b>          | 7.2 ± 1.3                                             | 4.04                              | <b>340</b>               | > 25000                                               | NT                                |
| <b>313</b>          | 860 ± 89                                              | NT                                | <b>341</b>               | > 25000                                               | NT                                |
| <b>314</b>          | 111 ± 12                                              | NT                                | <b>342</b>               | > 25000                                               | NT                                |
| <b>315</b>          | 21 ± 9                                                | 0.77                              | <b>343</b>               | > 25000                                               | NT                                |
| <b>316</b>          | 96 ± 37                                               | 4.45                              | Artemisinin <sup>b</sup> | 4.0 ± 4.2                                             | NT                                |

<sup>a</sup>NT represents not tested. <sup>b</sup>Artemisinin was used as the positive control.

**Table S2. Classification, source, bioactivity, synthesis, and structures of 682 terpenoids identified from Chloranthaceae plants**

| No.                                                     | Name                                                                        | Source/Ref.                                                            | Bioactivity/Ref.                                                                 | Synthesis/Ref. | Structure                                                                             |
|---------------------------------------------------------|-----------------------------------------------------------------------------|------------------------------------------------------------------------|----------------------------------------------------------------------------------|----------------|---------------------------------------------------------------------------------------|
| <b>I. Monoterpenoids (1–8) and triterpenoids (9–13)</b> |                                                                             |                                                                        |                                                                                  |                |                                                                                       |
| 1                                                       | $\alpha$ -Phellandrene                                                      | The essential oils components of Chloranthaceae species <sup>1,2</sup> | Varied activities such as analgesic and anti-inflammatory effects <sup>1,2</sup> | NA             | 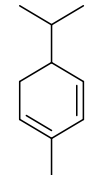   |
| 2                                                       | $\beta$ -Pinene                                                             | The essential oils components of Chloranthaceae species <sup>1,2</sup> | Varied activities such as analgesic and anti-inflammatory effects <sup>1,2</sup> | NA             |    |
| 3                                                       | Sabinene                                                                    | The essential oils components of Chloranthaceae species <sup>1,2</sup> | Varied activities such as analgesic and anti-inflammatory effects <sup>1,2</sup> | NA             |    |
| 4                                                       | $\alpha$ -Thujene                                                           | The essential oils components of Chloranthaceae species <sup>1,2</sup> | Varied activities such as analgesic and anti-inflammatory effects <sup>1,2</sup> | NA             |    |
| 5                                                       | (4 <i>R</i> , 6 <i>S</i> )-6-Hydroxy- <i>p</i> -menth-1-en-3-one            | <i>C. elatior</i> <sup>3</sup>                                         | Moderate inhibitory effect on human dihydroorotate dehydrogenase <sup>3</sup>    | NA             |   |
| 6                                                       | (3 <i>R</i> , 4 <i>R</i> , 6 <i>S</i> )-3,6-Dihydroxy- <i>p</i> -menth-1-en | <i>C. elatior</i> <sup>3</sup>                                         | NA                                                                               | NA             |  |

|    |                                   |                                  |    |    |                                                                                       |
|----|-----------------------------------|----------------------------------|----|----|---------------------------------------------------------------------------------------|
| 7  | Olibanumol C                      | <i>C. japonicus</i> <sup>4</sup> | NA | NA | 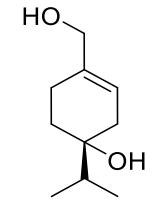   |
| 8  | Loliolide                         | <i>C. japonicus</i> <sup>5</sup> | NA | NA |    |
| 9  | 28-Hydroxyolean-12-ene-3,11-dione | <i>C. henryi</i> <sup>6</sup>    | NA | NA |    |
| 10 | Lupeol                            | <i>S. glabra</i> <sup>7</sup>    | NA | NA |   |
| 11 | 24-Hydroxylupeol                  | <i>S. glabra</i> <sup>7</sup>    | NA | NA |  |

|                                                      |                  |                                   |                                                                                                        |                                                                                                                              |                                                                                       |
|------------------------------------------------------|------------------|-----------------------------------|--------------------------------------------------------------------------------------------------------|------------------------------------------------------------------------------------------------------------------------------|---------------------------------------------------------------------------------------|
| 12                                                   | Sarcandroside A  | <i>S. glabra</i> <sup>8</sup>     | NA                                                                                                     | NA                                                                                                                           | 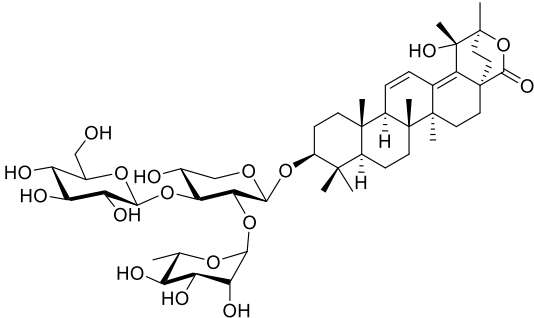   |
| 13                                                   | Sarcandroside B  | <i>S. glabra</i> <sup>8</sup>     | NA                                                                                                     | NA                                                                                                                           |    |
| <b>II. Sesquiterpenoids (14–288)</b>                 |                  |                                   |                                                                                                        |                                                                                                                              |                                                                                       |
| <b>II-a. Lindenane-type sesquiterpenoids (14–69)</b> |                  |                                   |                                                                                                        |                                                                                                                              |                                                                                       |
| 14                                                   | Shizukanolide    | <i>C. japonicus</i> <sup>9</sup>  | Antitumor effect <sup>10</sup><br>Hela IC <sub>50</sub> 17.2 μg/mL<br>K562 IC <sub>50</sub> 21.6 μg/mL | Synthesized from<br>Hajos–Wiechert<br>ketone ( <b>R12</b> ), <sup>11</sup><br>Simmons–Smith<br>cyclopropanation,<br>Scheme 5 |   |
| 15                                                   | Isoshizukanolide | <i>C. japonicus</i> <sup>12</sup> | NA                                                                                                     | NA                                                                                                                           |  |



|    |                                                   |                                                                      |                                                                                                                                                        |                                                                                                                                                                                                                                                                                                                                                                                            |  |
|----|---------------------------------------------------|----------------------------------------------------------------------|--------------------------------------------------------------------------------------------------------------------------------------------------------|--------------------------------------------------------------------------------------------------------------------------------------------------------------------------------------------------------------------------------------------------------------------------------------------------------------------------------------------------------------------------------------------|--|
| 16 | Yinxiancaoside A<br>Sarcaglaboside G <sup>#</sup> | <i>C. japonicus</i> <sup>13</sup><br><i>S. glabra</i> <sup>14#</sup> | NA                                                                                                                                                     | NA                                                                                                                                                                                                                                                                                                                                                                                         |  |
| 17 | Chloranoside A                                    | <i>C. japonicus</i> <sup>15</sup>                                    | Hepatoprotective effect <sup>16</sup>                                                                                                                  | NA                                                                                                                                                                                                                                                                                                                                                                                         |  |
| 18 | Chloranoside B                                    | <i>C. glaber</i> <sup>17</sup>                                       | NA                                                                                                                                                     | NA                                                                                                                                                                                                                                                                                                                                                                                         |  |
| 19 | Chloranthalactone A                               | <i>C. japonicus</i> <sup>15</sup>                                    | a. Antitumor effect <sup>15</sup><br>L-5178Y IC <sub>50</sub> 2.5 μg/mL<br>b. NF-κB inhibitory effect <sup>18</sup><br>IC <sub>50</sub> 2.84 ± 0.69 μM | a. Synthesized from Hagemann's ester ( <i>rac</i> - <b>R1</b> ), <sup>19,20</sup> racemic synthesis, Hodgson's conditions, Scheme 4<br>b. Synthesized from Hajos–Wiechert ketone ( <b>R12</b> ), <sup>11</sup> Simmons–Smith cyclopropanation, Scheme 5<br>c. Synthesized from (+)-verbenone ( <b>R20</b> ), <sup>21</sup> diazo-derived carbenoid<br>d. Synthesized from Wieland–Miescher |  |

|    |                                                                                                     |                                   |                                                                                                                          |                                                                                                                                                                                                                                                             |  |
|----|-----------------------------------------------------------------------------------------------------|-----------------------------------|--------------------------------------------------------------------------------------------------------------------------|-------------------------------------------------------------------------------------------------------------------------------------------------------------------------------------------------------------------------------------------------------------|--|
|    |                                                                                                     |                                   |                                                                                                                          | ketone ( <b>R29</b> ), <sup>22</sup> S <sub>N</sub> 2-type intramolecular nucleophilic substitution, Scheme 9                                                                                                                                               |  |
| 20 | Chloranthalactone B                                                                                 | <i>C. japonicus</i> <sup>15</sup> | a. Antitumor effect <sup>15</sup><br>L-5178Y IC <sub>50</sub> 1.0–2.5 μg/mL<br>b. Anti-inflammatory effect <sup>23</sup> | Synthesized from (±)-chloranthalactone A ( <i>rac</i> - <b>19</b> ) or (±)-shizukanolide E ( <i>rac</i> - <b>47</b> ), <sup>19,20</sup> racemic synthesis, epoxidation, Scheme 4                                                                            |  |
| 21 | Chloranthalactone C                                                                                 | <i>C. japonicus</i> <sup>15</sup> | Antitumor effect <sup>15</sup><br>L-5178Y IC <sub>50</sub> 20 μg/mL                                                      | NA                                                                                                                                                                                                                                                          |  |
| 22 | Chloranthalactone E                                                                                 | <i>C. japonicus</i> <sup>15</sup> | NA                                                                                                                       | NA                                                                                                                                                                                                                                                          |  |
| 23 | Chloranthalactone F<br>Revised as<br>Chloranthalactone A<br>photodimer ( <b>486</b> ) <sup>24</sup> | <i>C. glaber</i> <sup>25</sup>    | NA                                                                                                                       | a. Synthesized from (±)-chloranthalactone A ( <i>rac</i> - <b>19</b> ), <sup>19,20</sup> racemic synthesis, [2 + 2] photodimerization, Scheme 4<br>b. Synthesized from chloranthalactone A ( <b>19</b> ), <sup>11</sup> [2 + 2] photodimerization, Scheme 5 |  |
| 24 | Chloranthalactone G                                                                                 | <i>S. glabra</i> <sup>26</sup>    | NA                                                                                                                       | NA                                                                                                                                                                                                                                                          |  |

|    |                                                                                 |                                   |                                        |                                                                                                                              |                                                                                       |
|----|---------------------------------------------------------------------------------|-----------------------------------|----------------------------------------|------------------------------------------------------------------------------------------------------------------------------|---------------------------------------------------------------------------------------|
| 25 | 9-Hydroxy heterogorgiolide<br>The configuration of C-8 was revised <sup>5</sup> | <i>C. japonicus</i> <sup>27</sup> | NA                                     | Synthesized from (±)-chloranthalactone B ( <i>rac</i> - <b>20</b> ) <sup>19,20</sup> racemic synthesis, hydrolysis, Scheme 4 | 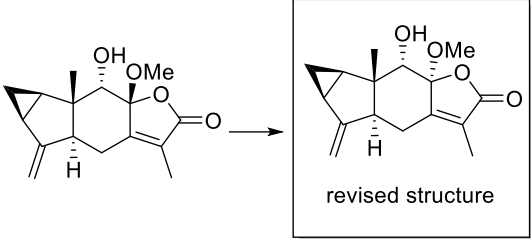   |
| 26 | Chlojaponilactone B                                                             | <i>C. japonicus</i> <sup>28</sup> | Anti-inflammatory effect <sup>29</sup> | NA                                                                                                                           |    |
| 27 | Chlojaponilactone C                                                             | <i>C. japonicus</i> <sup>28</sup> | NA                                     | NA                                                                                                                           |    |
| 28 | Chlojaponilactone D                                                             | <i>C. japonicus</i> <sup>28</sup> | NA                                     | NA                                                                                                                           |    |
| 29 | Chlojaponilactone F                                                             | <i>C. japonicus</i> <sup>30</sup> | NA                                     | NA                                                                                                                           |   |
| 30 | Chlojaponilactone G                                                             | <i>C. japonicus</i> <sup>30</sup> | Antifungal effect <sup>30</sup>        | NA                                                                                                                           |  |

|    |                     |                                   |    |    |                                                                                       |
|----|---------------------|-----------------------------------|----|----|---------------------------------------------------------------------------------------|
| 31 | Chlojaponilactone H | <i>C. japonicus</i> <sup>30</sup> | NA | NA | 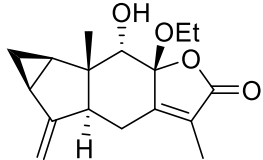   |
| 32 | Chlojaponilactone I | <i>C. japonicus</i> <sup>30</sup> | NA | NA |    |
| 33 | Chlorajapolide A    | <i>C. japonicus</i> <sup>31</sup> | NA | NA |    |
| 34 | Chlorajapolide B    | <i>C. japonicus</i> <sup>31</sup> | NA | NA |    |
| 35 | Chlorajapolide C    | <i>C. japonicus</i> <sup>31</sup> | NA | NA |   |
| 36 | Chlorajapolide D    | <i>C. japonicus</i> <sup>31</sup> | NA | NA |  |

|    |                                                      |                                                                        |    |    |  |
|----|------------------------------------------------------|------------------------------------------------------------------------|----|----|--|
| 37 | Chlorajapolide E                                     | <i>C. japonicus</i> <sup>31</sup>                                      | NA | NA |  |
| 38 | Chlorajapolide F                                     | <i>C. japonicus</i> <sup>5</sup>                                       | NA | NA |  |
| 39 | Chlorajapolide G<br>Chlojaponilactone E <sup>#</sup> | <i>C. japonicus</i> <sup>5</sup><br><i>C. japonicus</i> <sup>28#</sup> | NA | NA |  |
| 40 | Chlorajapolide H                                     | <i>C. japonicus</i> <sup>5</sup>                                       | NA | NA |  |
| 41 | Chlorajapolide J                                     | <i>C. japonicus</i> <sup>32</sup>                                      | NA | NA |  |
| 42 | Chlorajapolide K                                     | <i>C. japonicus</i> <sup>32</sup>                                      | NA | NA |  |

|    |                  |                                   |                                                   |                                                                                                                                  |                                                                                       |
|----|------------------|-----------------------------------|---------------------------------------------------|----------------------------------------------------------------------------------------------------------------------------------|---------------------------------------------------------------------------------------|
| 43 | Chlorajapolide L | <i>C. japonicus</i> <sup>32</sup> | Antimetastatic effect against HepG2 <sup>32</sup> | NA                                                                                                                               | 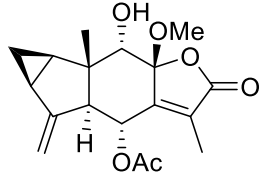   |
| 44 | Chlorajaposide   | <i>C. japonicus</i> <sup>31</sup> | NA                                                | NA                                                                                                                               |    |
| 45 | Shizukanolide C  | <i>C. japonicus</i> <sup>33</sup> | NA                                                | NA                                                                                                                               |    |
| 46 | Shizukanolide D  | <i>C. japonicus</i> <sup>34</sup> | NA                                                | NA                                                                                                                               |    |
| 47 | Shizukanolide E  | <i>C. serratus</i> <sup>34</sup>  | NA                                                | Synthesized from Hagemann's ester ( <i>rac</i> - <b>R1</b> ), <sup>19,20</sup> racemic synthesis, Hodgson's conditions, Scheme 4 |   |
| 48 | Shizukanolide F  | <i>C. serratus</i> <sup>34</sup>  | NA                                                | NA                                                                                                                               |  |

|    |                        |                                       |                                                                                                                          |                                                                                                                                                        |  |
|----|------------------------|---------------------------------------|--------------------------------------------------------------------------------------------------------------------------|--------------------------------------------------------------------------------------------------------------------------------------------------------|--|
| 49 | Shizukanolide G        | <i>C. fortunei</i> <sup>35</sup>      | NA                                                                                                                       | NA                                                                                                                                                     |  |
| 50 | Shizukanolide H        | <i>C. fortunei</i> <sup>35</sup>      | Neuroprotective effect <sup>36</sup><br>EC <sub>50</sub> 3.3 ± 0.9 μM                                                    | NA                                                                                                                                                     |  |
| 51 | Lindenanolide H        | <i>C. holostegius</i> <sup>37</sup>   | NA                                                                                                                       | NA                                                                                                                                                     |  |
| 52 | 14-Acetylshizukanolide | <i>C. anhuiensis</i> <sup>36</sup>    | NA                                                                                                                       | NA                                                                                                                                                     |  |
| 53 | Oxyonoseriolide        | <i>H. angustifolium</i> <sup>38</sup> | Anti-leishmanial effect <sup>38</sup>                                                                                    | NA                                                                                                                                                     |  |
| 54 | Onoseriolide           | <i>H. brasiliense</i> <sup>39</sup>   | a. Antinociception effect <sup>39</sup><br>b. Anti-leishmanial effect <sup>38</sup><br>c. Antitumor effect <sup>40</sup> | Synthesized from (+)-<br>verbenone ( <b>R20</b> ), <sup>41,42</sup><br>diazo-derived<br>carbenoid, Scheme 7                                            |  |
| 55 | Sarcandralactone A     | <i>S. glabra</i> <sup>43</sup>        | NA                                                                                                                       | a. Synthesized from<br>Hajos–Wiechert<br>ketone ( <b>R12</b> ), <sup>44</sup><br>Simmons–Smith<br>cyclopropanation,<br>Scheme 6<br>b. Synthesized from |  |

|    |                                                   |                                  |                                       |                                                                                                                                                                                                                                                                        |                                                                                       |
|----|---------------------------------------------------|----------------------------------|---------------------------------------|------------------------------------------------------------------------------------------------------------------------------------------------------------------------------------------------------------------------------------------------------------------------|---------------------------------------------------------------------------------------|
|    |                                                   |                                  |                                       | 1,3-cyclohexanedione enol ether ( <b>R14</b> ), <sup>45</sup> racemic synthesis, RCM and Simmons–Smith cyclopropanation, Scheme 6<br>c. Synthesized from iso-Hajos–Parrish ketone ( <b>R15</b> ), <sup>46</sup> three-step approach to construct <b>R15</b> , Scheme 6 |                                                                                       |
| 56 | Sarcandralactone C                                | <i>S. glabra</i> <sup>47</sup>   | NA                                    | NA                                                                                                                                                                                                                                                                     | 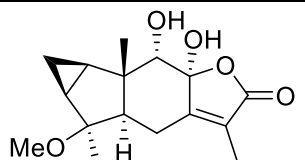   |
| 57 | Sarcandralactone D                                | <i>S. glabra</i> <sup>47</sup>   | NA                                    | NA                                                                                                                                                                                                                                                                     |    |
| 58 | Chloranthalactone E 8-O-β-D-glucopyranoside       | <i>C. spicatus</i> <sup>16</sup> | Hepatoprotective effect <sup>16</sup> | NA                                                                                                                                                                                                                                                                     |   |
| 59 | 8β,9α-Dihydroxylindan-4(5),7(11)-dien-8α,12-olide | <i>S. glabra</i> <sup>48</sup>   | NA                                    | NA                                                                                                                                                                                                                                                                     |  |



|    |                             |                                   |                                                                                        |    |                                                                                      |
|----|-----------------------------|-----------------------------------|----------------------------------------------------------------------------------------|----|--------------------------------------------------------------------------------------|
| 60 | Glabranol A                 | <i>S. glabra</i> <sup>49</sup>    | NA                                                                                     | NA | 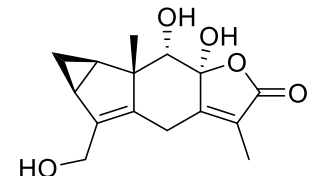  |
| 61 | Sarcaglaboside F            | <i>S. glabra</i> <sup>14</sup>    | NA                                                                                     | NA |   |
| 62 | Chlorafortulide             | <i>C. fortunei</i> <sup>50</sup>  | NA                                                                                     | NA |   |
| 63 | Rosmarylchloranthalactone E | <i>C. japonicus</i> <sup>51</sup> | Phosphodiesterase-4 inhibitory effect <sup>51</sup><br>IC <sub>50</sub> 0.96 ± 0.04 μM | NA |  |

|    |                         |                                 |    |    |                                                                                       |
|----|-------------------------|---------------------------------|----|----|---------------------------------------------------------------------------------------|
| 64 | Chloranerectuslactone V | <i>C. erectus</i> <sup>52</sup> | NA | NA |    |
| 65 | Sarglactone I           | <i>S. glabra</i> <sup>53</sup>  | NA | NA |    |
| 66 | Sarglactone J           | <i>S. glabra</i> <sup>53</sup>  | NA | NA |    |
| 67 | Sarglactone K           | <i>S. glabra</i> <sup>53</sup>  | NA | NA |    |
| 68 | Sarglactone L           | <i>S. glabra</i> <sup>53</sup>  | NA | NA |   |
| 69 | Sarglactone M           | <i>S. glabra</i> <sup>53</sup>  | NA | NA |  |

**II-b. Eudesmane-type sesquiterpenoids (70–177)**

|    |                                                   |                                       |    |    |  |
|----|---------------------------------------------------|---------------------------------------|----|----|--|
| 70 | Multisin F                                        | <i>C. multistachys</i> <sup>54</sup>  | NA | NA |  |
| 71 | Multistalin A                                     | <i>C. multistachys</i> <sup>55</sup>  | NA | NA |  |
| 72 | Multistalin B                                     | <i>C. multistachys</i> <sup>55</sup>  | NA | NA |  |
| 73 | Chloranthon A                                     | <i>C. elatior</i> <sup>56</sup>       | NA | NA |  |
| 74 | Chloranthon B                                     | <i>C. elatior</i> <sup>56</sup>       | NA | NA |  |
| 75 | Chloranthon C                                     | <i>C. elatior</i> <sup>56</sup>       | NA | NA |  |
| 76 | Chloranthon D                                     | <i>C. elatior</i> <sup>56</sup>       | NA | NA |  |
| 77 | 4 $\beta$ ,7 $\beta$ ,11-<br>Enantioeudesmantriol | <i>C. angustifolius</i> <sup>57</sup> | NA | NA |  |

|    |                                                            |                                    |                                                                          |    |  |
|----|------------------------------------------------------------|------------------------------------|--------------------------------------------------------------------------|----|--|
| 78 | Oplodiol                                                   | <i>C. spicatus</i> <sup>58</sup>   | NA                                                                       | NA |  |
| 79 | 5-Eudesmene-1 $\beta$ ,4 $\alpha$ -diol                    | <i>C. spicatus</i> <sup>59</sup>   | NA                                                                       | NA |  |
| 80 | Linderaggredin D                                           | <i>S. glabra</i> <sup>60</sup>     | Anti-inflammatory effect <sup>60</sup><br>IC <sub>50</sub> 11.5 ± 0.3 μM | NA |  |
| 81 | (7 <i>S</i> ,10 <i>S</i> )-7-Hydroxyeudesm-4-ene-3,6-dione | <i>C. anhuiensis</i> <sup>36</sup> | NA                                                                       | NA |  |
| 82 | Anhuenoside A                                              | <i>C. anhuiensis</i> <sup>61</sup> | NA                                                                       | NA |  |
| 83 | 11,12,13-Trihydroxyeudesma-4(15),8-dien-9-one              | <i>C. henryi</i> <sup>62</sup>     | NA                                                                       | NA |  |

|    |                                                                                   |                                                                     |                                                                                                              |    |  |
|----|-----------------------------------------------------------------------------------|---------------------------------------------------------------------|--------------------------------------------------------------------------------------------------------------|----|--|
| 84 | Chlorantene G                                                                     | <i>C. anhuiensis</i> <sup>36</sup>                                  | Moderate activity against <i>Helicobacter pylori</i> -SS1 MIC of 25–50 $\mu\text{g}/\text{mL}$ <sup>63</sup> | NA |  |
| 85 | 4(15)-Eudesmene-1 $\beta$ ,7 $\alpha$ ,11-triol                                   | <i>C. serratus</i> <sup>64</sup>                                    | NA                                                                                                           | NA |  |
| 86 | Eudesm-4(15)-ene-7 $\alpha$ ,11-diol                                              | <i>C. henryi</i> <sup>65</sup>                                      | NA                                                                                                           | NA |  |
| 87 | Sarglanoid D<br>The name is repeated for two different compounds <sup>60,66</sup> | <i>S. glabra</i> <sup>60</sup>                                      | NA                                                                                                           | NA |  |
| 88 | Serralactone A<br>Sarcandralactone B <sup>#</sup>                                 | <i>C. serratus</i> <sup>64</sup><br><i>S. glabra</i> <sup>43#</sup> | Antitumor effect via down-regulation of LIMK1 activation <sup>67</sup>                                       | NA |  |
| 89 | Chlojaponilactone A                                                               | <i>C. japonicus</i> <sup>68</sup>                                   | NA                                                                                                           | NA |  |
| 90 | 1 $\beta$ ,8 $\beta$ -Dihydroxyeudesman-3,7(11)-dien-8 $\alpha$ ,12-olide         | <i>C. multistachys</i> <sup>56</sup>                                | NA                                                                                                           | NA |  |

|    |                                                                                                    |                                      |    |    |  |
|----|----------------------------------------------------------------------------------------------------|--------------------------------------|----|----|--|
| 91 | Sarglanoid E<br>The name is repeated for two different compounds <sup>60,66</sup>                  | <i>S. glabra</i> <sup>66</sup>       | NA | NA |  |
| 92 | 1 $\alpha$ ,8 $\alpha$ ,9 $\alpha$ -<br>Trihydroxyeudesman-<br>3(4),7(11)-dien-8 $\beta$ ,12-olide | <i>S. glabra</i> <sup>69</sup>       | NA | NA |  |
| 93 | 1 $\alpha$ -Acetoxyeudesma-<br>3,7(11)-dien-8,12-olide                                             | <i>H. brasiliense</i> <sup>70</sup>  | NA | NA |  |
| 94 | <i>ent</i> -(3 <i>R</i> )-3-<br>Hydroxyatractylenolide III                                         | <i>C. multistachys</i> <sup>71</sup> | NA | NA |  |
| 95 | Chlorantholide G                                                                                   | <i>C. elatior</i> <sup>3</sup>       | NA | NA |  |
| 96 | Chlospicate A                                                                                      | <i>C. spicatus</i> <sup>59</sup>     | NA | NA |  |
| 97 | Chlospicate B                                                                                      | <i>C. spicatus</i> <sup>59</sup>     | NA | NA |  |

|     |                                                                                        |                                  |    |    |                                                                                       |
|-----|----------------------------------------------------------------------------------------|----------------------------------|----|----|---------------------------------------------------------------------------------------|
| 98  | Serralactone B                                                                         | <i>C. serratus</i> <sup>64</sup> | NA | NA | 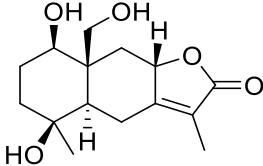   |
| 99  | Serralactone C                                                                         | <i>C. serratus</i> <sup>64</sup> | NA | NA |    |
| 100 | 1 $\beta$ ,4 $\beta$ -Dihydroxy-5 $\alpha$ ,8 $\beta$ (H)-eudesm-7(11)Z-en-8,12-olide  | <i>C. spicatus</i> <sup>58</sup> | NA | NA |    |
| 101 | 1 $\beta$ ,4 $\alpha$ -Dihydroxy-5 $\alpha$ ,8 $\beta$ (H)-eudesm-7(11)Z-en-8,12-olide | <i>C. spicatus</i> <sup>58</sup> | NA | NA |    |
| 102 | 4 $\beta$ ,8 $\beta$ -Dihydroxy-5 $\alpha$ (H)-7(11)-eudesm-en-8,12-olide              | <i>C. serratus</i> <sup>72</sup> | NA | NA |   |
| 103 | 4 $\beta$ -Hydroxy-5 $\alpha$ ,8 $\beta$ (H)-7(11)-eudesm-en-8,12-olide                | <i>C. serratus</i> <sup>72</sup> | NA | NA |  |
| 104 | 4 $\alpha$ -Hydroxy-5 $\alpha$ (H)-8 $\beta$ -methoxy-eudesm-7(11)-en-12,8-olide       | <i>C. spicatus</i> <sup>73</sup> | NA | NA |  |

|     |                                                                                   |                                      |                                        |    |  |
|-----|-----------------------------------------------------------------------------------|--------------------------------------|----------------------------------------|----|--|
| 105 | Chlorajapolide I                                                                  | <i>C. japonicus</i> <sup>5</sup>     | NA                                     | NA |  |
| 106 | Chloraeudolide                                                                    | <i>C. japonicus</i> <sup>31</sup>    | NA                                     | NA |  |
| 107 | Sarcaglaboside H                                                                  | <i>S. glabra</i> <sup>14</sup>       | NA                                     | NA |  |
| 108 | Multistalactone A                                                                 | <i>C. multistachys</i> <sup>71</sup> | NA                                     | NA |  |
| 109 | Serralactone D                                                                    | <i>C. serratus</i> <sup>64</sup>     | NA                                     | NA |  |
| 110 | Shizukolidol                                                                      | <i>C. japonicus</i> <sup>74</sup>    | NA                                     | NA |  |
| 111 | Sarglanoid C<br>The name is repeated for two different compounds <sup>60,66</sup> | <i>S. glabra</i> <sup>66</sup>       | Anti-inflammatory effect <sup>66</sup> | NA |  |



|     |                                                                                   |                                      |    |    |  |
|-----|-----------------------------------------------------------------------------------|--------------------------------------|----|----|--|
| 112 | Sarglanoid D<br>The name is repeated for two different compounds <sup>60,66</sup> | <i>S. glabra</i> <sup>66</sup>       | NA | NA |  |
| 113 | 8 $\beta$ -Cinnamoyloxy-eudesma-4(15),7(11)-dien-12,8-olide                       | <i>C. japonicus</i> <sup>75</sup>    | NA | NA |  |
| 114 | Chlorajapotriol                                                                   | <i>C. japonicus</i> <sup>76</sup>    | NA | NA |  |
| 115 | Multistalactone C                                                                 | <i>C. multistachys</i> <sup>71</sup> | NA | NA |  |
| 116 | Multistalactone B                                                                 | <i>C. multistachys</i> <sup>71</sup> | NA | NA |  |
| 117 | Neolitacumone B                                                                   | <i>C. serratus</i> <sup>64</sup>     | NA | NA |  |

|     |                                                                                    |                                                                             |                                                                                                 |    |  |
|-----|------------------------------------------------------------------------------------|-----------------------------------------------------------------------------|-------------------------------------------------------------------------------------------------|----|--|
| 118 | Codonolactone <sup>77</sup><br>Atractylenolide III <sup>#</sup>                    | <i>Codonopsis pilosula</i> <sup>77</sup><br><i>C. henryi</i> <sup>78#</sup> | Antitumor effect by<br>downregulating the<br>transcriptional activity of<br>Runx2 <sup>79</sup> | NA |  |
| 119 | 3 $\beta$ -Hydroxyeudesma-<br>4(15),7(11)-dien-8 $\alpha$ ,12-olide                | <i>S. glabra</i> <sup>60</sup>                                              | NA                                                                                              | NA |  |
| 120 | 2 $\alpha$ -Hydroxyeudesma-4(15),7<br>(11)-dien-8 $\alpha$ ,12-olide               | <i>S. glabra</i> <sup>80</sup>                                              | NA                                                                                              | NA |  |
| 121 | Sarcaglaboside A                                                                   | <i>S. glabra</i> <sup>16</sup>                                              | Hepatoprotective effect <sup>16</sup>                                                           | NA |  |
| 122 | Atractylenolide II                                                                 | <i>C. glaber</i> <sup>25</sup>                                              | NA                                                                                              | NA |  |
| 123 | 8 $\beta$ ,9 $\alpha$ -Dihydroxyeudesman-<br>4(15),7(11)-dien-8 $\alpha$ ,12-olide | <i>S. glabra</i> <sup>48</sup>                                              | NA                                                                                              | NA |  |
| 124 | (3 <i>R</i> )-3-<br>Hydroxyattractylenolide III                                    | <i>C. anhuiensis</i> <sup>81</sup>                                          | NA                                                                                              | NA |  |

|     |                               |                                                       |                                                                                                           |    |  |
|-----|-------------------------------|-------------------------------------------------------|-----------------------------------------------------------------------------------------------------------|----|--|
| 125 | 9 $\alpha$ -Hydroxyasterolide | <i>H. orientale</i> <sup>82</sup>                     | Antitumor effect <sup>82</sup><br>A549 IC <sub>50</sub> 3.1 $\mu$ M<br>HL-60 IC <sub>50</sub> 8.8 $\mu$ M | NA |  |
| 126 | Sarcaglaboside B              | <i>S. glabra</i> <sup>16</sup>                        | Hepatoprotective effect <sup>16</sup>                                                                     | NA |  |
| 127 | Sarcandralactone E            | <i>S. glabra</i> <sup>47</sup>                        | NA                                                                                                        | NA |  |
| 128 | Chlorahupetolide A            | <i>C. henryi</i> var. <i>hupehensis</i> <sup>83</sup> | NA                                                                                                        | NA |  |
| 129 | Chlorahupetolide B            | <i>C. henryi</i> var. <i>hupehensis</i> <sup>83</sup> | NA                                                                                                        | NA |  |
| 130 | Chlorahupetolide C            | <i>C. henryi</i> var. <i>hupehensis</i> <sup>83</sup> | NA                                                                                                        | NA |  |

|     |                    |                                                       |    |    |  |
|-----|--------------------|-------------------------------------------------------|----|----|--|
| 131 | Chlorahupetolide D | <i>C. henryi</i> var. <i>hupehensis</i> <sup>83</sup> | NA | NA |  |
| 132 | Chlorahupetolide E | <i>C. henryi</i> var. <i>hupehensis</i> <sup>83</sup> | NA | NA |  |
| 133 | Chlorahupetolide F | <i>C. henryi</i> var. <i>hupehensis</i> <sup>83</sup> | NA | NA |  |
| 134 | Chlorahupetolide G | <i>C. henryi</i> var. <i>hupehensis</i> <sup>83</sup> | NA | NA |  |
| 135 | Chlorahupetolide H | <i>C. henryi</i> var. <i>hupehensis</i> <sup>83</sup> | NA | NA |  |
| 136 | Chlorahupetolide I | <i>C. henryi</i> var. <i>hupehensis</i> <sup>83</sup> | NA | NA |  |
| 137 | Chlorahupetolide J | <i>C. henryi</i> var. <i>hupehensis</i> <sup>83</sup> | NA | NA |  |

|     |                        |                                                       |                                        |    |                                                                                       |
|-----|------------------------|-------------------------------------------------------|----------------------------------------|----|---------------------------------------------------------------------------------------|
| 138 | Chlorahupetolide K     | <i>C. henryi</i> var. <i>hupehensis</i> <sup>83</sup> | NA                                     | NA | 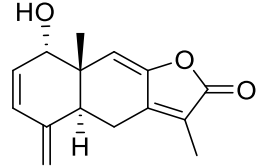   |
| 139 | Chlorahupetolide L     | <i>C. henryi</i> var. <i>hupehensis</i> <sup>83</sup> | Anti-inflammatory effect <sup>83</sup> | NA |    |
| 140 | Chlorahupetolide M     | <i>C. henryi</i> var. <i>hupehensis</i> <sup>83</sup> | NA                                     | NA |    |
| 141 | Chlorahupetolide N     | <i>C. henryi</i> var. <i>hupehensis</i> <sup>83</sup> | NA                                     | NA |    |
| 142 | (+)-Chlorahupetolide O | <i>C. henryi</i> var. <i>hupehensis</i> <sup>83</sup> | NA                                     | NA |   |
| 143 | (-)-Chlorahupetolide O | <i>C. henryi</i> var. <i>hupehensis</i> <sup>83</sup> | NA                                     | NA |  |
| 144 | Atractylenolactam      | <i>C. fortunei</i> <sup>84</sup>                      | NA                                     | NA |  |

|     |                                                                                               |                                       |    |    |                                                                                       |
|-----|-----------------------------------------------------------------------------------------------|---------------------------------------|----|----|---------------------------------------------------------------------------------------|
| 145 | Sarglanoid B                                                                                  | <i>S. glabra</i> <sup>66</sup>        | NA | NA | 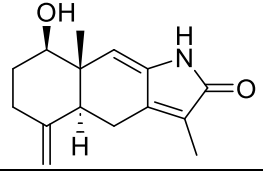   |
| 146 | Chlomultiol D                                                                                 | <i>C. multistachys</i> <sup>85</sup>  | NA | NA |    |
| 147 | Sarglanoid A                                                                                  | <i>S. glabra</i> <sup>66</sup>        | NA | NA |    |
| 148 | Chlorantene J                                                                                 | <i>C. anhuiensis</i> <sup>36</sup>    | NA | NA |    |
| 149 | 5 $\alpha$ -Cinnamoyloxy-8,12-epoxy-3-methoxy-7 $\beta$ ,8 $\alpha$ H-eudesma-3,11-dien-6-one | <i>C. japonicus</i> <sup>75</sup>     | NA | NA |   |
| 150 | 9 $\alpha$ -Hydroxycurcolonol                                                                 | <i>C. angustifolius</i> <sup>86</sup> | NA | NA |  |

|     |                    |                                       |                                   |    |  |
|-----|--------------------|---------------------------------------|-----------------------------------|----|--|
| 151 | Curcolanol         | <i>C. angustifolius</i> <sup>86</sup> | Antitumor effect <sup>87,88</sup> | NA |  |
| 152 | Chlorantene B      | <i>C. serratus</i> <sup>63</sup>      | NA                                | NA |  |
| 153 | (+)-Chlorantene M  | <i>C. multistachys</i> <sup>89</sup>  | NA                                | NA |  |
| 154 | (-)-Chlorantene M  | <i>C. multistachys</i> <sup>89</sup>  | NA                                | NA |  |
| 155 | (+)-Chlorantene M1 | <i>C. multistachys</i> <sup>89</sup>  | NA                                | NA |  |
| 156 | (-)-Chlorantene M1 | <i>C. multistachys</i> <sup>89</sup>  | NA                                | NA |  |

|     |                                                          |                                      |                                                                                                       |    |                                                                                       |
|-----|----------------------------------------------------------|--------------------------------------|-------------------------------------------------------------------------------------------------------|----|---------------------------------------------------------------------------------------|
| 157 | Curcolone                                                | <i>C. henryi</i> <sup>65</sup>       | NA                                                                                                    | NA | 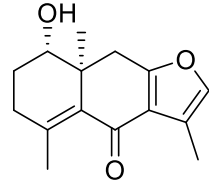   |
| 158 | 1 $\alpha$ -Methoxy-8,12-epoxyeudesma-4,7,11-trien-6-one | <i>C. henryi</i> <sup>62</sup>       | NA                                                                                                    | NA |    |
| 159 | Chlorantene D                                            | <i>C. serratus</i> <sup>63</sup>     | Moderate activity against <i>Helicobacter pylori</i> -SS1 MIC of 25–50 $\mu\text{g/mL}$ <sup>63</sup> | NA |    |
| 160 | Chlomultiol H                                            | <i>C. multistachys</i> <sup>85</sup> | NA                                                                                                    | NA |    |
| 161 | Chlomultiol I                                            | <i>C. multistachys</i> <sup>85</sup> | NA                                                                                                    | NA |   |
| 162 | (5 <i>S</i> ,10 <i>S</i> )-9-Oxo-atractylon              | <i>C. anhuiensis</i> <sup>36</sup>   | NA                                                                                                    | NA |  |



|     |                                                                                       |                                      |    |    |                                                                                       |
|-----|---------------------------------------------------------------------------------------|--------------------------------------|----|----|---------------------------------------------------------------------------------------|
| 163 | 8,12-Epoxy-1 $\alpha$ -hydroxy-4 $\alpha$ H,5 $\alpha$ H-eudesma-7,11-diene-6,9-dione | <i>C. anhuiensis</i> <sup>36</sup>   | NA | NA | 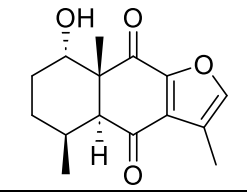   |
| 164 | 6,9-Dioxo-1 $\alpha$ ,4 $\alpha$ -dihydroxy-furanoeremophilane                        | <i>C. multistachys</i> <sup>90</sup> | NA | NA |    |
| 165 | Chlorantene C                                                                         | <i>C. serratus</i> <sup>63</sup>     | NA | NA |    |
| 166 | 4 $\alpha$ -Hydroxy-8,12-epoxyeudesma-7,11-diene-1,6-dione                            | <i>C. anhuiensis</i> <sup>36</sup>   | NA | NA |    |
| 167 | 4 $\alpha$ ,5 $\alpha$ -Epoxy-6,9-dioxo-1 $\alpha$ -hydroxyl-furanoeremophilane       | <i>C. multistachys</i> <sup>90</sup> | NA | NA |   |
| 168 | 1 $\alpha$ -Hydroxy-8,12-epoxyeudesma-4,7,11-triene-3,6-dione                         | <i>C. henryi</i> <sup>65</sup>       | NA | NA |  |

|     |                                                                                      |                                   |                                 |    |                                                                                       |
|-----|--------------------------------------------------------------------------------------|-----------------------------------|---------------------------------|----|---------------------------------------------------------------------------------------|
| 169 | 8,12-Epoxy-1 $\alpha$ -methoxy-4 $\alpha$ H,5 $\alpha$ H-eudesma-7,11-dien-6,9-dione | <i>C. japonicus</i> <sup>75</sup> | NA                              | NA | 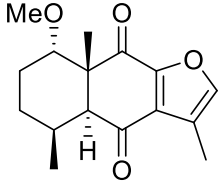   |
| 170 | Shizukafuranol                                                                       | <i>C. japonicus</i> <sup>74</sup> | NA                              | NA |    |
| 171 | 8,12-Epoxy-1 $\beta$ -hydroxyeudesm-3,7,11-trien-9-one                               | <i>C. japonicus</i> <sup>4</sup>  | NA                              | NA |    |
| 172 | CJ-01                                                                                | <i>C. japonicus</i> <sup>91</sup> | Antifungal effect <sup>91</sup> | NA |    |
| 173 | Chlojaponol A                                                                        | <i>C. japonicus</i> <sup>30</sup> | NA                              | NA |    |
| 174 | Chlojaponol B                                                                        | <i>C. japonicus</i> <sup>30</sup> | NA                              | NA |   |
| 175 | Chlorajapodiolide                                                                    | <i>C. japonicus</i> <sup>76</sup> | NA                              | NA |  |

|                                                      |                                                                                   |                                      |    |                                                                                                                                                                                                                                                                                                                                                 |                                                                                       |
|------------------------------------------------------|-----------------------------------------------------------------------------------|--------------------------------------|----|-------------------------------------------------------------------------------------------------------------------------------------------------------------------------------------------------------------------------------------------------------------------------------------------------------------------------------------------------|---------------------------------------------------------------------------------------|
| 176                                                  | Sarglanoid E<br>The name is repeated for two different compounds <sup>60,66</sup> | <i>S. glabra</i> <sup>60</sup>       | NA | NA                                                                                                                                                                                                                                                                                                                                              | 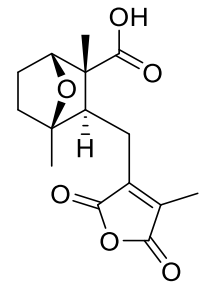   |
| 177                                                  | 5 $\alpha$ ,7 $\alpha$ (H)-6,8-Cycloodesma-1 $\beta$ ,4 $\beta$ -diol             | <i>C. spicatus</i> <sup>58</sup>     | NA | NA                                                                                                                                                                                                                                                                                                                                              |    |
| <b>II-c. Guaiane-type sesquiterpenoids (178–204)</b> |                                                                                   |                                      |    |                                                                                                                                                                                                                                                                                                                                                 |                                                                                       |
| 178                                                  | (+)-Zedoalactone A                                                                | <i>C. multistachys</i> <sup>71</sup> | NA | a. Synthesized from (3a <i>S</i> ,7a <i>R</i> ,8 <i>R</i> ,9a <i>S</i> )-7a,8,9,9a-Tetrahydro-5,8-dimethyl-4 <i>H</i> -3a,8-epoxyazuleno[6,5- <i>b</i> ]furan-2,6(3 <i>H</i> ,7 <i>H</i> )-dione, <sup>92</sup><br>organocatalytic [4 + 3] cycloaddition reaction<br>b. Synthesized from santonin, <sup>93</sup><br>photochemical rearrangement |    |
| 179                                                  | Multistalactone E                                                                 | <i>C. multistachys</i> <sup>71</sup> | NA | NA                                                                                                                                                                                                                                                                                                                                              |  |

|     |                                                 |                                                                           |                                               |    |  |
|-----|-------------------------------------------------|---------------------------------------------------------------------------|-----------------------------------------------|----|--|
| 180 | Multistalactone F                               | <i>C. multistachys</i> <sup>71</sup>                                      | NA                                            | NA |  |
| 181 | Multistalactone D<br>Chlospicate C <sup>#</sup> | <i>C. multistachys</i> <sup>71</sup><br><i>C. spicatus</i> <sup>59#</sup> | NA                                            | NA |  |
| 182 | Chlospicate D                                   | <i>C. spicatus</i> <sup>59</sup>                                          | NA                                            | NA |  |
| 183 | Chlohenriol B                                   | <i>C. henryi</i> <sup>94</sup>                                            | Moderate neuroprotective effect <sup>94</sup> | NA |  |
| 184 | Chlohenriol C                                   | <i>C. henryi</i> <sup>94</sup>                                            | Moderate neuroprotective effect <sup>94</sup> | NA |  |
| 185 | Chlomultiol E                                   | <i>C. multistachys</i> <sup>85</sup>                                      | NA                                            | NA |  |

|     |                                                                     |                                      |    |                                                                                                                                                                                                                                                                                                                                                                                                                                                          |                                                                                       |
|-----|---------------------------------------------------------------------|--------------------------------------|----|----------------------------------------------------------------------------------------------------------------------------------------------------------------------------------------------------------------------------------------------------------------------------------------------------------------------------------------------------------------------------------------------------------------------------------------------------------|---------------------------------------------------------------------------------------|
| 186 | Chlomultiol F                                                       | <i>C. multistachys</i> <sup>85</sup> | NA | NA                                                                                                                                                                                                                                                                                                                                                                                                                                                       | 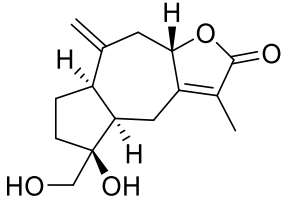   |
| 187 | Chlomultiol G                                                       | <i>C. multistachys</i> <sup>85</sup> | NA | NA                                                                                                                                                                                                                                                                                                                                                                                                                                                       |    |
| 188 | Hedyosumin A                                                        | <i>H. orientale</i> <sup>82</sup>    | NA | <p>a. Synthesized in 14 steps with 3.3% overall yield,<sup>95</sup> enantioselective Diels–Alder reaction and intermolecular Pt-catalyzed [3 + 2] cycloaddition reaction</p> <p>b. Synthesized in 13 steps with 6.1% overall yield,<sup>96</sup> organocatalytic [4 + 3] cycloaddition reaction</p> <p>c. Synthesized in 6 steps with 13.3% overall<sup>97</sup> visible-light-induced direct C(sp<sup>3</sup>)–H hydroxylation of enones, Scheme 14</p> |    |
| 189 | Hedyosumin B<br>The configuration of C-11 was revised <sup>97</sup> | <i>H. orientale</i> <sup>82</sup>    | NA | <p>a. Synthesized in 15 steps with 3.2% overall yield,<sup>95</sup> enantioselective Diels–Alder reaction and intermolecular Pt-catalyzed [3 + 2] cycloaddition reaction</p>                                                                                                                                                                                                                                                                             |  |

|     |                                                                     |                                   |    |                                                                                                                                                                                                                                                                                                                                                                                                                                                          |                                                                                       |
|-----|---------------------------------------------------------------------|-----------------------------------|----|----------------------------------------------------------------------------------------------------------------------------------------------------------------------------------------------------------------------------------------------------------------------------------------------------------------------------------------------------------------------------------------------------------------------------------------------------------|---------------------------------------------------------------------------------------|
|     |                                                                     |                                   |    | <p>b. Synthesized in 14 steps with 4.8% overall yield,<sup>96</sup> organocatalytic [4 + 3] cycloaddition reaction</p> <p>c. Synthesized in 4 steps with 16.9% overall<sup>97</sup> visible-light-induced direct C(sp<sup>3</sup>)-H hydroxylation of enones, Scheme 14</p>                                                                                                                                                                              |                                                                                       |
| 190 | Hedyosumin C<br>The configuration of C-11 was revised <sup>97</sup> | <i>H. orientale</i> <sup>82</sup> | NA | <p>a. Synthesized in 14 steps with 3.5% overall yield,<sup>95</sup> enantioselective Diels-Alder reaction and intermolecular Pt-catalyzed [3 + 2] cycloaddition reaction</p> <p>b. Synthesized in 13 steps with 6.2% overall yield,<sup>96</sup> organocatalytic [4 + 3] cycloaddition reaction</p> <p>c. Synthesized in 4 steps with 16.1% overall<sup>97</sup> visible-light-induced direct C(sp<sup>3</sup>)-H hydroxylation of enones, Scheme 14</p> | 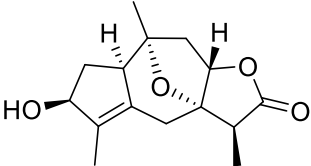   |
| 191 | Hedyosumin D                                                        | <i>H. orientale</i> <sup>82</sup> | NA | NA                                                                                                                                                                                                                                                                                                                                                                                                                                                       |  |

|     |                          |                                     |    |                                                                                                                                                                                                                                                                                        |                                                                                      |
|-----|--------------------------|-------------------------------------|----|----------------------------------------------------------------------------------------------------------------------------------------------------------------------------------------------------------------------------------------------------------------------------------------|--------------------------------------------------------------------------------------|
| 192 | Hedyosumin E             | <i>H. orientale</i> <sup>82</sup>   | NA | NA                                                                                                                                                                                                                                                                                     | 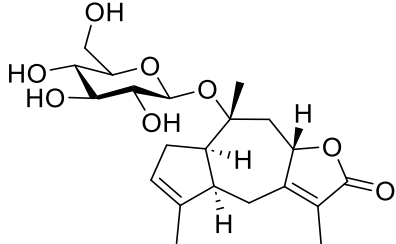  |
| 193 | Hedyosumin E aglycon     | <i>H. orientale</i> <sup>82</sup>   | NA | Synthesized from (3 <i>aS</i> ,7 <i>aR</i> ,8 <i>R</i> ,9 <i>aS</i> )-7 <i>a</i> ,8,9,9 <i>a</i> -Tetrahydro-5,8-dimethyl-4 <i>H</i> -3 <i>a</i> ,8-epoxyazuleno[6,5- <i>b</i> ]furan-2,6(3 <i>H</i> ,7 <i>H</i> )-dione, <sup>92</sup> organocatalytic [4 + 3] cycloaddition reaction |   |
| 194 | Hedyosumin F             | <i>H. orientale</i> <sup>98</sup>   | NA | NA                                                                                                                                                                                                                                                                                     |   |
| 195 | 7,10-Epoxyhedyosminolide | <i>H. arborescens</i> <sup>99</sup> | NA | Synthesized from (3 <i>aS</i> ,7 <i>aR</i> ,8 <i>R</i> ,9 <i>aS</i> )-7 <i>a</i> ,8,9,9 <i>a</i> -Tetrahydro-5,8-dimethyl-4 <i>H</i> -3 <i>a</i> ,8-epoxyazuleno[6,5- <i>b</i> ]furan-2,6(3 <i>H</i> ,7 <i>H</i> )-dione, <sup>92</sup> organocatalytic [4 + 3] cycloaddition reaction |  |

|     |                                          |                                       |                                           |    |                                                                                       |
|-----|------------------------------------------|---------------------------------------|-------------------------------------------|----|---------------------------------------------------------------------------------------|
| 196 | 1,2-Epoxy-10 $\alpha$ -hydroxy-podoandin | <i>H. brasiliense</i> <sup>100</sup>  | NA                                        | NA | 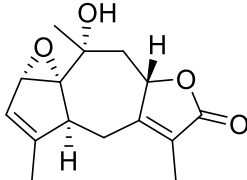   |
| 197 | 1-Hydroxy-10(15)-methylenepodoandin      | <i>H. brasiliense</i> <sup>100</sup>  | NA                                        | NA |    |
| 198 | Podoandin                                | <i>H. brasiliense</i> <sup>101</sup>  | Antidepressant-like effect <sup>101</sup> | NA |    |
| 199 | Chlomultin A                             | <i>C. multistachys</i> <sup>102</sup> | NA                                        | NA |    |
| 200 | Chloraniolide A                          | <i>C. anhuiensis</i> <sup>81</sup>    | NA                                        | NA |   |
| 201 | 12-Oxochloraniolide A                    | <i>C. henryi</i> <sup>103</sup>       | NA                                        | NA |  |



|                                                         |                                                                      |                                      |    |    |                                                                                      |
|---------------------------------------------------------|----------------------------------------------------------------------|--------------------------------------|----|----|--------------------------------------------------------------------------------------|
| 202                                                     | (7 <i>S</i> ,1(10) <i>Z</i> )-4,5-Secoguaia-1(10),11-diene-4,5-dione | <i>C. henryi</i> <sup>103</sup>      | NA | NA | 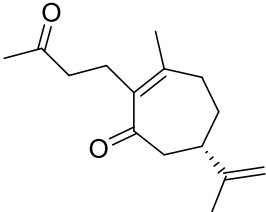  |
| 203                                                     | Multisin D                                                           | <i>C. multistachys</i> <sup>54</sup> | NA | NA |   |
| 204                                                     | Multisin E                                                           | <i>C. multistachys</i> <sup>54</sup> | NA | NA |   |
| <b>II-d. Germacrane-type sesquiterpenoids (205–227)</b> |                                                                      |                                      |    |    |                                                                                      |
| 205                                                     | (+)-Chlogermacrone A                                                 | <i>C. henryi</i> <sup>104</sup>      | NA | NA |   |
| 206                                                     | (-)-Chlogermacrone A                                                 | <i>C. henryi</i> <sup>104</sup>      | NA | NA |  |

|     |                                                                               |                                    |                                       |    |                                                                                       |
|-----|-------------------------------------------------------------------------------|------------------------------------|---------------------------------------|----|---------------------------------------------------------------------------------------|
| 207 | (+)-Chlogermacrone B                                                          | <i>C. henryi</i> <sup>104</sup>    | NA                                    | NA | 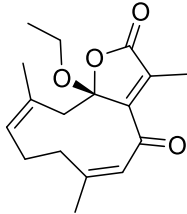   |
| 208 | (-)-Chlogermacrone B                                                          | <i>C. henryi</i> <sup>104</sup>    | NA                                    | NA |    |
| 209 | (+)-Chlogermacrone C                                                          | <i>C. henryi</i> <sup>104</sup>    | Neuroprotective effect <sup>104</sup> | NA |    |
| 210 | (-)-Chlogermacrone C                                                          | <i>C. henryi</i> <sup>104</sup>    | Neuroprotective effect <sup>104</sup> | NA |    |
| 211 | Curcuzederone                                                                 | <i>C. anhuiensis</i> <sup>36</sup> | Neuroprotective effect <sup>104</sup> | NA |  |
| 212 | (1 <i>S</i> ,4 <i>S</i> ,5 <i>S</i> ,10 <i>S</i> )-1,10:4,5-Diepoxygermacrone | <i>C. henryi</i> <sup>103</sup>    | NA                                    | NA |  |

|     |                                                                                     |                                  |                                                                                            |    |                                                                                       |
|-----|-------------------------------------------------------------------------------------|----------------------------------|--------------------------------------------------------------------------------------------|----|---------------------------------------------------------------------------------------|
| 213 | Germacra-5 <i>E</i> ,10(14)-dien-1 <i>β</i> ,4 <i>β</i> -diol                       | <i>C. spicatus</i> <sup>59</sup> | NA                                                                                         | NA | 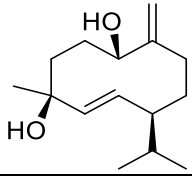   |
| 214 | 4 <i>α</i> ,5 <i>α</i> -Epoxy-1(10),7(11)-dienegermacr-8 <i>α</i> ,12-olide         | <i>C. spicatus</i> <sup>59</sup> | NA                                                                                         | NA |    |
| 215 | Chlorantene E                                                                       | <i>C. serratus</i> <sup>63</sup> | Moderate activity against <i>Helicobacter pylori</i> -SS1 MIC of 25–50 μg/mL <sup>63</sup> | NA |    |
| 216 | Chloranthatone                                                                      | <i>C. fortunei</i> <sup>84</sup> | NA                                                                                         | NA |    |
| 217 | (1 <i>E</i> ,4 <i>Z</i> )-8-Hydroxy-6-oxogermacra-1(10),4,7(11)-trieno-12,8-lactone | <i>C. henryi</i> <sup>62</sup>   | NA                                                                                         | NA |   |
| 218 | 8-Methoxy-6-oxogermacra-1(10),4,7(11)-trieno-12,8-lactone                           | <i>C. henryi</i> <sup>62</sup>   | NA                                                                                         | NA |  |

|     |                                                                            |                                   |                                       |                                                                                |                                                                                       |
|-----|----------------------------------------------------------------------------|-----------------------------------|---------------------------------------|--------------------------------------------------------------------------------|---------------------------------------------------------------------------------------|
| 219 | 15-Hydroxy-11 $\beta$ H-8-oxogermacra-1(10),4-dieno-12,6 $\alpha$ -lactone | <i>C. henryi</i> <sup>62</sup>    | NA                                    | NA                                                                             | 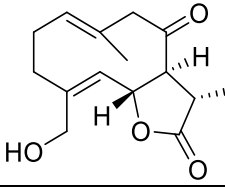   |
| 220 | Sarcaglaboside E                                                           | <i>S. g labra</i> <sup>16</sup>   | Hepatoprotective effect <sup>16</sup> | NA                                                                             |    |
| 221 | Acoragermacrone                                                            | <i>C. serratus</i> <sup>105</sup> | NA                                    | Synthesized from farnesol, <sup>106</sup> unique Pd-catalyzed macrocyclization |    |
| 222 | Zederone                                                                   | <i>C. serratus</i> <sup>105</sup> | NA                                    | NA                                                                             |    |
| 223 | Furanodienone                                                              | <i>C. serratus</i> <sup>105</sup> | NA                                    | NA                                                                             |   |
| 224 | Glechomanolide                                                             | <i>C. japonicus</i> <sup>12</sup> | NA                                    | NA                                                                             |  |

|                                                       |                 |                                     |                                        |    |                                                                                       |
|-------------------------------------------------------|-----------------|-------------------------------------|----------------------------------------|----|---------------------------------------------------------------------------------------|
| 225                                                   | Isofuranodiene  | <i>C. japonicus</i> <sup>12</sup>   | NA                                     | NA | 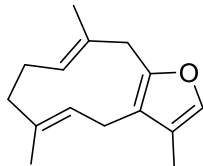   |
| 226                                                   | Chloranolide E  | <i>C. holostegius</i> <sup>37</sup> | NA                                     | NA |    |
| 227                                                   | Chlorantolide A | <i>C. anhuiensis</i> <sup>36</sup>  | NA                                     | NA |    |
| <b>II-e. Cadinane-type sesquiterpenoids (228–247)</b> |                 |                                     |                                        |    |                                                                                       |
| 228                                                   | Chloranolide B  | <i>C. holostegius</i> <sup>37</sup> | NA                                     | NA |    |
| 229                                                   | Chloranolide C  | <i>C. holostegius</i> <sup>37</sup> | NA                                     | NA |   |
| 230                                                   | Chloranolide D  | <i>C. holostegius</i> <sup>37</sup> | Anti-inflammatory effect <sup>37</sup> | NA |  |

|     |                   |                                      |                                        |    |                                                                                       |
|-----|-------------------|--------------------------------------|----------------------------------------|----|---------------------------------------------------------------------------------------|
| 231 | Chlomultiol J     | <i>C. multistachys</i> <sup>85</sup> | NA                                     | NA | 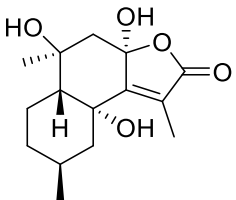   |
| 232 | Chlomultiol K     | <i>C. multistachys</i> <sup>85</sup> | Anti-inflammatory effect <sup>85</sup> | NA |    |
| 233 | Chlomultiol L     | <i>C. multistachys</i> <sup>85</sup> | Anti-inflammatory effect <sup>85</sup> | NA |    |
| 234 | (-)-Chlorantene N | <i>C. multistachys</i> <sup>89</sup> | NA                                     | NA |    |
| 235 | (+)-Chlorantene N | <i>C. multistachys</i> <sup>89</sup> | NA                                     | NA |   |
| 236 | Phacadinane E     | <i>C. anhuiensis</i> <sup>36</sup>   | NA                                     | NA |  |

|     |                                                                                                       |                                       |                                                                                                                                                                                   |    |  |
|-----|-------------------------------------------------------------------------------------------------------|---------------------------------------|-----------------------------------------------------------------------------------------------------------------------------------------------------------------------------------|----|--|
| 237 | (4 $\alpha$ )-8-Hydroxy-12-norcardina-6,8,10-trien-11-one                                             | <i>C. henryi</i> <sup>103</sup>       | NA                                                                                                                                                                                | NA |  |
| 238 | 6 $\alpha$ ,8 $\alpha$ ,10 $\alpha$ -Trihydroxycardina-4(15),7(11)-dien-12-oic acid $\gamma$ -lactone | <i>C. serratus</i> <sup>72</sup>      | NA                                                                                                                                                                                | NA |  |
| 239 | Chlomultin C                                                                                          | <i>C. multistachys</i> <sup>102</sup> | NA                                                                                                                                                                                | NA |  |
| 240 | (4 $\alpha$ ,11 $\beta$ )-8,11-Dihydroxycadina-6,8,10-trien-12-oic acid $\gamma$ -lactone             | <i>C. henryi</i> <sup>6</sup>         | NA                                                                                                                                                                                | NA |  |
| 241 | (4 $\beta$ ,11 $\beta$ )-8,11-Dihydroxycadina-6,8,10-trien-12-oic acid $\gamma$ -lactone              | <i>C. henryi</i> <sup>6</sup>         | NA                                                                                                                                                                                | NA |  |
| 242 | (8 $\alpha$ )-6,8-Dihydroxycadina-7(11),10(15)-dien-12-oic acid $\gamma$ -lactone                     | <i>C. henryi</i> <sup>6</sup>         | Antitumor effect <sup>6</sup><br>Hela IC <sub>50</sub> 4.7 $\mu$ M<br>A549 IC <sub>50</sub> 8.9 $\mu$ M<br>MCF IC <sub>50</sub> 9.6 $\mu$ M<br>K562 IC <sub>50</sub> 11.8 $\mu$ M | NA |  |

|                                                      |                        |                                                       |    |                                                                                                                                                |                                                                                       |
|------------------------------------------------------|------------------------|-------------------------------------------------------|----|------------------------------------------------------------------------------------------------------------------------------------------------|---------------------------------------------------------------------------------------|
| 243                                                  | Pyrocurzerenone        | <i>C. serratus</i> <sup>107</sup>                     | NA | Synthesized from methyl 2-methyl-4-oxo-2-vinylpentanoate, <sup>108</sup> 3-methylfuran annulation reaction using l-nitro-l-(phenylthio)propene | 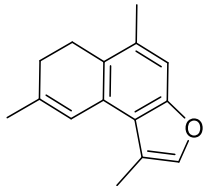   |
| 244                                                  | (+)-Chlorahupetolide P | <i>C. henryi</i> var. <i>hupehensis</i> <sup>83</sup> | NA | NA                                                                                                                                             |    |
| 245                                                  | (-)-Chlorahupetolide P | <i>C. henryi</i> var. <i>hupehensis</i> <sup>83</sup> | NA | NA                                                                                                                                             |    |
| 246                                                  | (+)-Chlorahupetolide Q | <i>C. henryi</i> var. <i>hupehensis</i> <sup>83</sup> | NA | NA                                                                                                                                             |    |
| 247                                                  | (-)-Chlorahupetolide Q | <i>C. henryi</i> var. <i>hupehensis</i> <sup>83</sup> | NA | NA                                                                                                                                             |   |
| <b>II-f. Elemene-type sesquiterpenoids (248–255)</b> |                        |                                                       |    |                                                                                                                                                |                                                                                       |
| 248                                                  | Curzerenone            | <i>C. serratus</i> <sup>63</sup>                      | NA | Synthesized from methyl 2-methyl-4-oxo-2-vinylpentanoate, <sup>108</sup> 3-methylfuran                                                         |  |



|     |                                   |                                      |                                                                                                  | annulation reaction<br>using l-nitro-l-<br>(phenylthio)propene |                                                                                      |
|-----|-----------------------------------|--------------------------------------|--------------------------------------------------------------------------------------------------|----------------------------------------------------------------|--------------------------------------------------------------------------------------|
| 249 | Sarglanoid H                      | <i>S. glabra</i> <sup>109</sup>      | NA                                                                                               | NA                                                             | 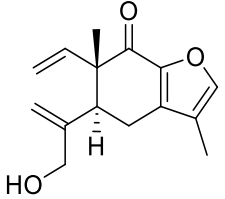  |
| 250 | Isogermafurenolide                | <i>C. anhuiensis</i> <sup>36</sup>   | NA                                                                                               | NA                                                             |   |
| 251 | 15-Acetoxy-<br>isogermafurenolide | <i>H. brasiliense</i> <sup>100</sup> | NA                                                                                               | NA                                                             |   |
| 252 | Linderolide F                     | <i>H. brasiliense</i> <sup>100</sup> | NA                                                                                               | NA                                                             |   |
| 253 | Chlorantene F                     | <i>C. serratus</i> <sup>63</sup>     | Moderate activity against<br><i>Helicobacter pylori</i> -SS1 MIC<br>of 25–50 µg/mL <sup>63</sup> | NA                                                             |  |

|                                                           |                                                             |                                   |                                       |    |                                                                                       |
|-----------------------------------------------------------|-------------------------------------------------------------|-----------------------------------|---------------------------------------|----|---------------------------------------------------------------------------------------|
| 254                                                       | Sarcaglaboside C                                            | <i>S. glabra</i> <sup>16</sup>    | Hepatoprotective effect <sup>16</sup> | NA | 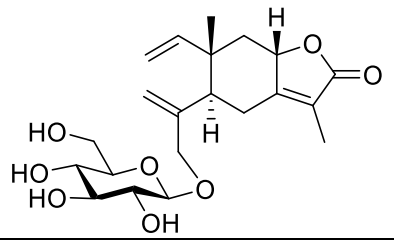   |
| 255                                                       | Sarcaglaboside D                                            | <i>S. glabra</i> <sup>16</sup>    | Hepatoprotective effect <sup>16</sup> | NA |    |
| <b>II-g. Eremophilane-type sesquiterpenoids (256–266)</b> |                                                             |                                   |                                       |    |                                                                                       |
| 256                                                       | 1-Oxo-10 $\beta$ H-eremophila-7(11)-en-8 $\alpha$ ,12-olide | <i>S. glabra</i> <sup>60</sup>    | NA                                    | NA |    |
| 257                                                       | Istanbulin A                                                | <i>S. glabra</i> <sup>60</sup>    | NA                                    | NA |   |
| 258                                                       | Istanbulin B                                                | <i>S. glabra</i> <sup>60</sup>    | NA                                    | NA |  |
| 259                                                       | Tsoongianolide D                                            | <i>C. japonicus</i> <sup>28</sup> | NA                                    | NA |  |

|     |                                                                                                                          |                                    |                                        |    |  |
|-----|--------------------------------------------------------------------------------------------------------------------------|------------------------------------|----------------------------------------|----|--|
| 260 | Tsoongianolide E                                                                                                         | <i>C. japonicus</i> <sup>28</sup>  | NA                                     | NA |  |
| 261 | 10 $\alpha$ -Hydroxy-1-oxoeremophila-7(11),8(9)-dien-8,12-olide                                                          | <i>C. japonicus</i> <sup>28</sup>  | NA                                     | NA |  |
| 262 | (3 <i>R</i> ,4 <i>S</i> ,5 <i>R</i> ,10 <i>S</i> ,11 <i>S</i> )-3-Hydroxy-8-oxo-6-eremophilen-12-oic acid                | <i>C. anhuiensis</i> <sup>61</sup> | NA                                     | NA |  |
| 263 | Anhuienol                                                                                                                | <i>C. anhuiensis</i> <sup>61</sup> | NA                                     | NA |  |
| 264 | (3 <i>R</i> ,4 <i>S</i> ,5 <i>R</i> ,6 <i>R</i> ,8 <i>R</i> ,10 <i>S</i> )-3,6,8-Trihydroxy-7(11)-eremophilen-12,8-olide | <i>C. anhuiensis</i> <sup>61</sup> | NA                                     | NA |  |
| 265 | 3 $\alpha$ ,6 $\alpha$ -Dihydroxy-8 $\alpha$ H-7(11)-eremophilen-12,8-olide                                              | <i>C. anhuiensis</i> <sup>61</sup> | NA                                     | NA |  |
| 266 | Sarglanoid F                                                                                                             | <i>S. glabra</i> <sup>66</sup>     | Anti-inflammatory effect <sup>66</sup> | NA |  |

**II-h. Monocyclofarnesane-type sesquiterpenoids (267–274)**

|     |                                                          |                                 |    |    |                                                                                       |
|-----|----------------------------------------------------------|---------------------------------|----|----|---------------------------------------------------------------------------------------|
| 267 | Dihydrovomifoliol                                        | <i>S. glabra</i> <sup>110</sup> | NA | NA | 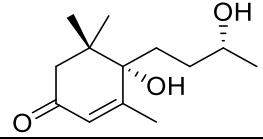   |
| 268 | Dihydrovomifoliol- <i>O</i> - $\beta$ -D-glucopyranoside | <i>S. glabra</i> <sup>110</sup> | NA | NA |    |
| 269 | Drovomifoliol- <i>O</i> - $\beta$ -D-glucopyranoside     | <i>S. glabra</i> <sup>110</sup> | NA | NA |    |
| 270 | $\beta$ -D-Glucopyranosyl abscisate                      | <i>S. glabra</i> <sup>110</sup> | NA | NA |   |
| 271 | Icariside B1                                             | <i>S. glabra</i> <sup>110</sup> | NA | NA |  |

|                                                            |                                                      |                                   |    |    |                                                                                       |
|------------------------------------------------------------|------------------------------------------------------|-----------------------------------|----|----|---------------------------------------------------------------------------------------|
| 272                                                        | Abscisic acid                                        | <i>S. glabra</i> <sup>110</sup>   | NA | NA | 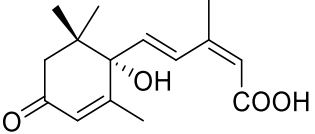   |
| 273                                                        | Pisumionoside                                        | <i>C. japonicus</i> <sup>13</sup> | NA | NA |    |
| 274                                                        | Yinxiancaoside B                                     | <i>C. japonicus</i> <sup>13</sup> | NA | NA |    |
| <b>II-i. Aromadendrane-type sesquiterpenoids (275–281)</b> |                                                      |                                   |    |    |                                                                                       |
| 275                                                        | Sarglanoid G                                         | <i>S. glabra</i> <sup>109</sup>   | NA | NA |   |
| 276                                                        | (9 <i>S</i> ,10 <i>S</i> )-(-)-9β-Hydroxycyclochrome | <i>S. glabra</i> <sup>109</sup>   | NA | NA |  |

|                                                      |                                                |                                   |    |                                                                      |                                                                                       |
|------------------------------------------------------|------------------------------------------------|-----------------------------------|----|----------------------------------------------------------------------|---------------------------------------------------------------------------------------|
| 277                                                  | Aromadendrane-4 $\beta$ ,10 $\beta$ ,15-triol  | <i>C. elatior</i> <sup>111</sup>  | NA | NA                                                                   | 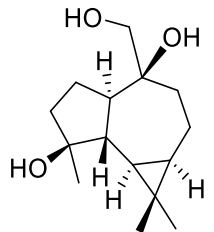   |
| 278                                                  | Aromadendrane-4 $\beta$ ,10 $\alpha$ ,15-triol | <i>C. elatior</i> <sup>111</sup>  | NA | NA                                                                   |    |
| 279                                                  | Aromadendrane-4 $\beta$ ,10 $\beta$ -diol      | <i>H. orientale</i> <sup>82</sup> | NA | NA                                                                   |    |
| 280                                                  | Spathulenol                                    | <i>C. spicatus</i> <sup>58</sup>  | NA | Synthesized from bicyclogermacrene <sup>112</sup>                    |   |
| 281                                                  | 4 $\beta$ ,10 $\alpha$ -Dihydroxyaromadendrane | <i>C. spicatus</i> <sup>58</sup>  | NA | Synthesized from <i>trans</i> -fused apoaromadendrone <sup>113</sup> |  |
| <b>II-j. Drimane-type sesquiterpenoids (282–283)</b> |                                                |                                   |    |                                                                      |                                                                                       |

|                                                    |                                    |                                  |                                               |    |                                                                                       |
|----------------------------------------------------|------------------------------------|----------------------------------|-----------------------------------------------|----|---------------------------------------------------------------------------------------|
| 282                                                | Chlohenriol A                      | <i>C. henryi</i> <sup>94</sup>   | Moderate neuroprotective effect <sup>94</sup> | NA | 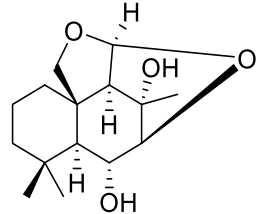   |
| 283                                                | 11-Hydroxydrim-8,12-en-14-oic acid | <i>C. henryi</i> <sup>65</sup>   | NA                                            | NA |    |
| <b>II-k. Isodaucane-type sesquiterpenoid (284)</b> |                                    |                                  |                                               |    |                                                                                       |
| 284                                                | Homalomenol C                      | <i>C. spicatus</i> <sup>59</sup> | NA                                            | NA |    |
| <b>II-l. Oplopanane-type sesquiterpenoid (285)</b> |                                    |                                  |                                               |    |                                                                                       |
| 285                                                | Oplopanone                         | <i>C. spicatus</i> <sup>59</sup> | NA                                            | NA |   |
| <b>II-m. Brasilane-type sesquiterpenoid (286)</b>  |                                    |                                  |                                               |    |                                                                                       |
| 286                                                | Chlospicate E                      | <i>C. spicatus</i> <sup>59</sup> | NA                                            | NA |  |

| <b>II-n. Acorane-type sesquiterpenoid (287)</b>           |                                                                                                  |                                   |                                                                     |    |                                                                                      |
|-----------------------------------------------------------|--------------------------------------------------------------------------------------------------|-----------------------------------|---------------------------------------------------------------------|----|--------------------------------------------------------------------------------------|
| <b>287</b>                                                | Shizukaacoradienol                                                                               | <i>C. japonicus</i> <sup>74</sup> | NA                                                                  | NA | 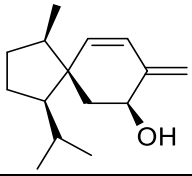  |
| <b>II-o. Maaliane-type sesquiterpenoid (288)</b>          |                                                                                                  |                                   |                                                                     |    |                                                                                      |
| <b>288</b>                                                | (1 <i>S</i> ,4 <i>S</i> ,5 <i>S</i> ,6 <i>R</i> ,7 <i>R</i> ,10 <i>S</i> )-1,4-Dihydroxymaaliane | <i>C. elatior</i> <sup>111</sup>  | NA                                                                  | NA |   |
| <b>III. Sesquiterpenoid oligomers (289–531)</b>           |                                                                                                  |                                   |                                                                     |    |                                                                                      |
| <b>III-a. Dimeric lindnane sesquiterpenoids (289–495)</b> |                                                                                                  |                                   |                                                                     |    |                                                                                      |
| <b>III-a1. [4 + 2]-Cycloaddition type (289–473)</b>       |                                                                                                  |                                   |                                                                     |    |                                                                                      |
| <b>289</b>                                                | Fortunilide A                                                                                    | <i>C. fortunei</i> <sup>114</sup> | Antimalarial effect <sup>114</sup><br>EC <sub>50</sub> 5.2 ± 0.6 nM | NA |  |



|     |               |                                   |                                                                    |    |                                                                                      |
|-----|---------------|-----------------------------------|--------------------------------------------------------------------|----|--------------------------------------------------------------------------------------|
| 290 | Fortunilide B | <i>C. fortunei</i> <sup>114</sup> | Antimalarial effect <sup>114</sup><br>EC <sub>50</sub> 19 ± 8 nM   | NA | 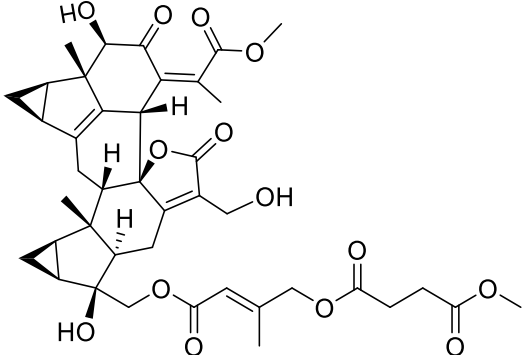  |
| 291 | Fortunilide C | <i>C. fortunei</i> <sup>114</sup> | Antimalarial effect <sup>114</sup><br>EC <sub>50</sub> 211 ± 56 nM | NA |   |
| 292 | Fortunilide D | <i>C. fortunei</i> <sup>114</sup> | Antimalarial effect <sup>114</sup><br>EC <sub>50</sub> 30 ± 8 nM   | NA |  |

|     |               |                                   |                                                                       |    |                                                                                      |
|-----|---------------|-----------------------------------|-----------------------------------------------------------------------|----|--------------------------------------------------------------------------------------|
| 293 | Fortunilide E | <i>C. fortunei</i> <sup>114</sup> | Antimalarial effect <sup>114</sup><br>EC <sub>50</sub> 43 ± 3 nM      | NA | 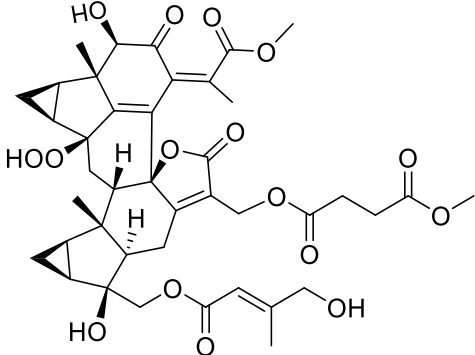  |
| 294 | Fortunilide F | <i>C. fortunei</i> <sup>114</sup> | Antimalarial effect <sup>114</sup><br>EC <sub>50</sub> 5300 ± 2000 nM | NA |   |
| 295 | Fortunilide G | <i>C. fortunei</i> <sup>114</sup> | Antimalarial effect <sup>114</sup><br>EC <sub>50</sub> 46 ± 3 nM      | NA |  |

|     |               |                                   |                                                                       |    |                                                                                      |
|-----|---------------|-----------------------------------|-----------------------------------------------------------------------|----|--------------------------------------------------------------------------------------|
| 296 | Fortunilide H | <i>C. fortunei</i> <sup>114</sup> | Antimalarial effect <sup>114</sup><br>EC <sub>50</sub> 198 ± 22 nM    | NA | 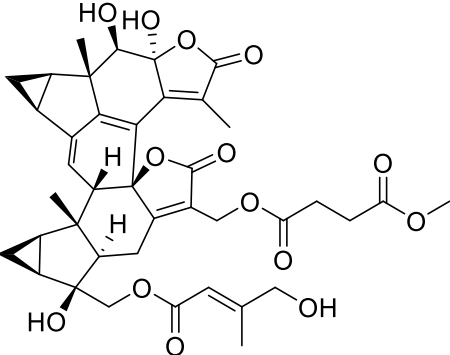  |
| 297 | Fortunilide I | <i>C. fortunei</i> <sup>114</sup> | Antimalarial effect <sup>114</sup><br>EC <sub>50</sub> 94 ± 30 nM     | NA |   |
| 298 | Fortunilide J | <i>C. fortunei</i> <sup>114</sup> | Antimalarial effect <sup>114</sup><br>EC <sub>50</sub> 9900 ± 2700 nM | NA |  |

|     |               |                                   |                                                                       |    |                                                                                      |
|-----|---------------|-----------------------------------|-----------------------------------------------------------------------|----|--------------------------------------------------------------------------------------|
| 299 | Fortunilide K | <i>C. fortunei</i> <sup>114</sup> | Antimalarial effect <sup>114</sup><br>EC <sub>50</sub> 4700 ± 500 nM  | NA | 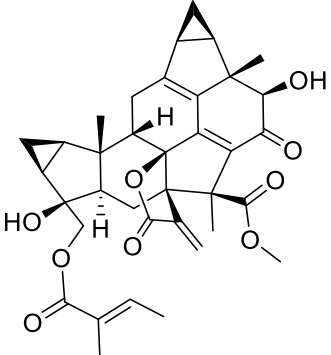  |
| 300 | Fortunilide L | <i>C. fortunei</i> <sup>114</sup> | Antimalarial effect <sup>114</sup><br>EC <sub>50</sub> 99 ± 18 nM     | NA |   |
| 301 | Fortunoid A   | <i>C. fortunei</i> <sup>115</sup> | Antimalarial effect <sup>115</sup><br>EC <sub>50</sub> 10200 ± 370 nM | NA |  |

|     |                                              |                                                             |                                                                     |    |                                                                                                                                                                                                                                                                                                                                                                                                                                                                                                                                                                                    |
|-----|----------------------------------------------|-------------------------------------------------------------|---------------------------------------------------------------------|----|------------------------------------------------------------------------------------------------------------------------------------------------------------------------------------------------------------------------------------------------------------------------------------------------------------------------------------------------------------------------------------------------------------------------------------------------------------------------------------------------------------------------------------------------------------------------------------|
| 302 | Fortunoid B                                  | <i>C. fortunei</i> <sup>115</sup>                           | Antimalarial effect <sup>115</sup><br>EC <sub>50</sub> 495 ± 10 nM  | NA | 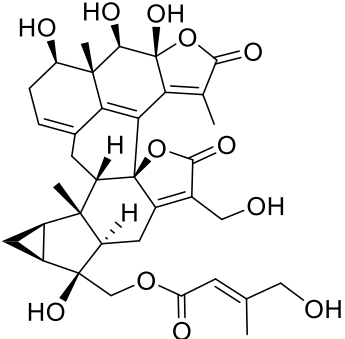 <p>The structure of Fortunoid B is a complex polycyclic molecule. It features a central ring system with multiple hydroxyl groups (HO) and a lactone ring. A side chain includes a hydroxymethyl group (-CH<sub>2</sub>OH) and a branched chain with a terminal hydroxyl group (-CH<sub>2</sub>OH) and a methyl group.</p>                                                                                                                                                                     |
| 303 | Fortunoid C                                  | <i>C. fortunei</i> <sup>115</sup>                           | NA                                                                  | NA |  <p>The structure of Fortunoid C is a complex polycyclic molecule. It features a central ring system with multiple hydroxyl groups (HO) and a lactone ring. A side chain includes a hydroxymethyl group (-CH<sub>2</sub>OH) and a branched chain with a terminal hydroxyl group (-CH<sub>2</sub>OH) and a methyl group. Another side chain has a methoxy group (-OCH<sub>3</sub>).</p>                                                                                                          |
| 304 | 15'- <i>O</i> -(4-Hydroxytigloyl)fortunoid C | <i>S. glabra</i> subsp. <i>brachystachys</i> <sup>116</sup> | Antimalarial effect <sup>116</sup><br>EC <sub>50</sub> 1500 ± 12 nM | NA |  <p>The structure of 15'-<i>O</i>-(4-Hydroxytigloyl)fortunoid C is a complex polycyclic molecule. It features a central ring system with multiple hydroxyl groups (HO) and a lactone ring. A side chain includes a hydroxymethyl group (-CH<sub>2</sub>OH) and a branched chain with a terminal hydroxyl group (-CH<sub>2</sub>OH) and a methyl group. Another side chain has a methoxy group (-OCH<sub>3</sub>). The structure is similar to Fortunoid C but with a different side chain.</p> |

|     |                                                                  |                                                             |                                                                           |                                                                                                                                                                      |                                                                                                                                                                                                                                                                                                                                                                          |
|-----|------------------------------------------------------------------|-------------------------------------------------------------|---------------------------------------------------------------------------|----------------------------------------------------------------------------------------------------------------------------------------------------------------------|--------------------------------------------------------------------------------------------------------------------------------------------------------------------------------------------------------------------------------------------------------------------------------------------------------------------------------------------------------------------------|
| 305 | 13'- <i>O</i> -Methyl succinyl-15'- <i>O</i> -tigloylfortunoid C | <i>S. glabra</i> subsp. <i>brachystachys</i> <sup>116</sup> | NA                                                                        | NA                                                                                                                                                                   | 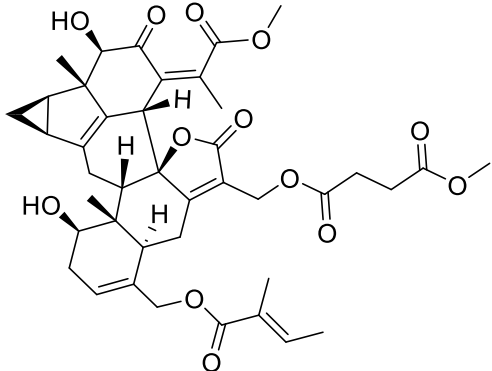 <p>The structure shows a complex polycyclic terpenoid core with multiple stereocenters. It features a methyl succinyl group at the 13' position and a tigloyl group at the 15' position. The tigloyl group is a propenoate derivative with a methyl group at the alpha position.</p> |
| 306 | 13'- <i>O</i> -Methyl succinylshizukaol C (Sarbracholide)        | <i>S. glabra</i> subsp. <i>brachystachys</i> <sup>116</sup> | Antimalarial effect <sup>116</sup><br>EC <sub>50</sub> 0.0043 ± 0.0003 nM | Synthesized from (+)-verbenone ( <b>R20</b> ) in 19 steps, <sup>117</sup> MTBD-mediated one-pot Z-type elimination/lactonization and biomimetic [4 + 2] dimerization |  <p>This structure is similar to 305 but features a different side chain at the 15' position, which is a propenoate derivative with a methyl group at the alpha position and a hydroxyl group at the gamma position.</p>                                                              |
| 307 | 4''-Hydroxysarcandrolide A                                       | <i>S. glabra</i> subsp. <i>brachystachys</i> <sup>116</sup> | Antimalarial effect <sup>116</sup><br>EC <sub>50</sub> 36 ± 8 nM          | NA                                                                                                                                                                   |  <p>This structure is similar to 305 but features a different side chain at the 15' position, which is a propenoate derivative with a methyl group at the alpha position and a hydroxyl group at the gamma position.</p>                                                             |

|     |                                                  |                                                             |                                                                   |    |                                                                                                                                                                                                                                                                                                                                                                                       |
|-----|--------------------------------------------------|-------------------------------------------------------------|-------------------------------------------------------------------|----|---------------------------------------------------------------------------------------------------------------------------------------------------------------------------------------------------------------------------------------------------------------------------------------------------------------------------------------------------------------------------------------|
| 308 | 13'- <i>O</i> -Acetylsarcandrolide B             | <i>S. glabra</i> subsp. <i>brachystachys</i> <sup>116</sup> | Antimalarial effect <sup>116</sup><br>EC <sub>50</sub> 85 ± 1 nM  | NA | 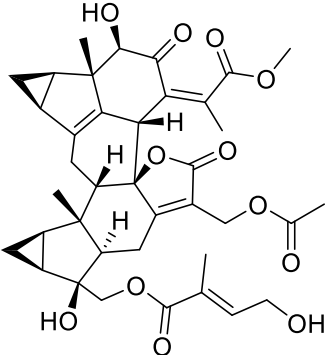 <p>The structure shows a complex polycyclic core with multiple stereocenters. It features a hydroxyl group (HO) at the top, a methyl ester group (-COOCH<sub>3</sub>) on the right, and a side chain containing an acetyl group (-COCH<sub>3</sub>) and a hydroxyl group (-OH) at the bottom.</p> |
| 309 | 13'- <i>O</i> -Methyl succinylchlorajaponilide E | <i>S. glabra</i> subsp. <i>brachystachys</i> <sup>116</sup> | Antimalarial effect <sup>116</sup><br>EC <sub>50</sub> 60 ± 10 nM | NA |  <p>The structure is similar to 308 but features a succinyl side chain (-CO(CH<sub>2</sub>)<sub>2</sub>COOCH<sub>3</sub>) instead of an acetyl group. It also has a hydroxyl group (HO) at the top and another (HOO) on the left side of the core.</p>                                             |
| 310 | (7'' <i>S</i> )-7''-Hydroxychloramutilide A      | <i>S. glabra</i> subsp. <i>brachystachys</i> <sup>116</sup> | Antimalarial effect <sup>116</sup><br>EC <sub>50</sub> > 2000 nM  | NA |  <p>The structure is similar to 308 but has a more complex side chain with a hydroxyl group (-OH) and a methyl ester group (-COOCH<sub>3</sub>) at the bottom. It also features a hydroxyl group (HO) at the top and another (HO) on the left side of the core.</p>                               |

|     |                |                                   |                                                                      |                                                                                                                                                                        |                                                                                      |
|-----|----------------|-----------------------------------|----------------------------------------------------------------------|------------------------------------------------------------------------------------------------------------------------------------------------------------------------|--------------------------------------------------------------------------------------|
| 311 | Sarglabolide I | <i>S. glabra</i> <sup>118</sup>   | Antimalarial effect <sup>114</sup><br>EC <sub>50</sub> 4600 ± 200 nM | Synthesized from <b>R42</b> and <b>R45</b> that are accessible from (+)-verbenone ( <b>R20</b> ), <sup>21</sup> base-mediated thermal [4 + 2] cycloaddition, Scheme 10 | 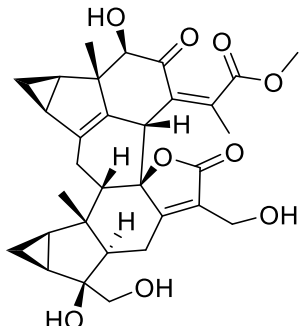  |
| 312 | Sarglabolide J | <i>S. glabra</i> <sup>118</sup>   | Antimalarial effect <sup>114</sup><br>EC <sub>50</sub> 7.2 ± 1.3 nM  | NA                                                                                                                                                                     |   |
| 313 | Shizukaol K    | <i>C. fortunei</i> <sup>119</sup> | Antimalarial effect <sup>114</sup><br>EC <sub>50</sub> 860 ± 89 nM   | NA                                                                                                                                                                     |  |



|     |             |                                    |                                                                                                                                                                                                                                                                                                                                                         |                                                                                                                                                                        |                                                                                      |
|-----|-------------|------------------------------------|---------------------------------------------------------------------------------------------------------------------------------------------------------------------------------------------------------------------------------------------------------------------------------------------------------------------------------------------------------|------------------------------------------------------------------------------------------------------------------------------------------------------------------------|--------------------------------------------------------------------------------------|
| 314 | Shizukaol I | <i>C. japonicus</i> <sup>120</sup> | Antimalarial effect <sup>114</sup><br>EC <sub>50</sub> 111 ± 12 nM                                                                                                                                                                                                                                                                                      | Synthesized from <b>R42</b> and <b>R45</b> that are accessible from (+)-verbenone ( <b>R20</b> ), <sup>21</sup> base-mediated thermal [4 + 2] cycloaddition, Scheme 10 | 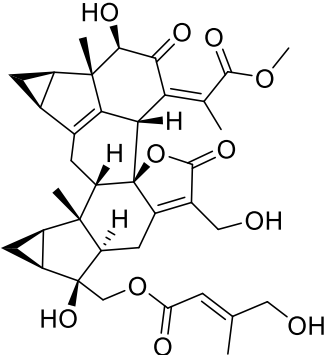  |
| 315 | Shizukaol C | <i>C. serratus</i> <sup>121</sup>  | a. Antimalarial effect <sup>114</sup><br>EC <sub>50</sub> 21 ± 9 nM<br>b. Antifungal effect <sup>122</sup><br>c. Anti-neuroinflammatory effect <sup>54,123,124</sup><br>d. Antitumor effect <sup>123</sup><br>MGC-803 IC <sub>50</sub> 4.60 μM<br>HepG2 IC <sub>50</sub> 3.17 μM<br>HL-60 IC <sub>50</sub> 1.57 μM<br>e. Anti-HIV effect <sup>125</sup> | Synthesized from <b>R42</b> and <b>R45</b> that are accessible from (+)-verbenone ( <b>R20</b> ), <sup>21</sup> base-mediated thermal [4 + 2] cycloaddition, Scheme 10 |   |
| 316 | Shizukaol M | <i>C. fortunei</i> <sup>119</sup>  | a. Antimalarial effect <sup>114</sup><br>EC <sub>50</sub> 96 ± 37 nM<br>b. Multidrug resistance reversal effect <sup>126</sup><br>c. Anti-inflammatory effect <sup>50</sup><br>IC <sub>50</sub> 7.01 ± 0.2 μM                                                                                                                                           | NA                                                                                                                                                                     |  |

|     |                                            |                                                                          |                                                                                                                                                                                                                                                                                                                                           |                                                                                                                                                                        |                                                                                      |
|-----|--------------------------------------------|--------------------------------------------------------------------------|-------------------------------------------------------------------------------------------------------------------------------------------------------------------------------------------------------------------------------------------------------------------------------------------------------------------------------------------|------------------------------------------------------------------------------------------------------------------------------------------------------------------------|--------------------------------------------------------------------------------------|
| 317 | Chlorajaponilide C                         | <i>C. japonicus</i> <sup>125</sup>                                       | Antimalarial effect <sup>114</sup><br>EC <sub>50</sub> 1.1 ± 0.2 nM                                                                                                                                                                                                                                                                       | Synthesized from <b>R42</b> and <b>R45</b> that are accessible from (+)-verbenone ( <b>R20</b> ), <sup>21</sup> base-mediated thermal [4 + 2] cycloaddition, Scheme 10 | 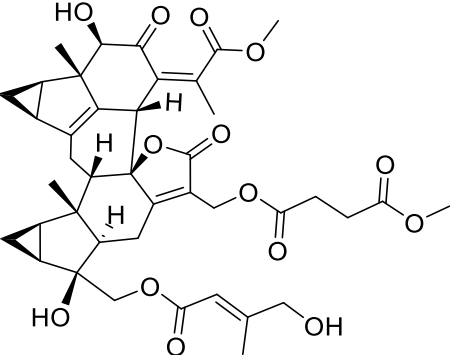  |
| 318 | Chlorahololide D<br>Henriol D <sup>#</sup> | <i>C. holostegius</i> <sup>127</sup><br><i>C. henryi</i> <sup>128#</sup> | a. Antimalarial effect <sup>114</sup><br>EC <sub>50</sub> 13 ± 3 nM<br>b. Anti-inflammatory effect <sup>50</sup><br>IC <sub>50</sub> 1.90 ± 0.5 μM<br>c. Anti-neuroinflammatory effect <sup>54</sup><br>d. Selective potassium channel blocker <sup>124,127</sup><br>IC <sub>50</sub> 2.7 ± 0.3 μM<br>e. Antifungal effect <sup>129</sup> | NA                                                                                                                                                                     |   |
| 319 | Shizukaol N                                | <i>C. fortunei</i> <sup>119</sup>                                        | Antimalarial effect <sup>114</sup><br>EC <sub>50</sub> 100 ± 10 nM                                                                                                                                                                                                                                                                        | NA                                                                                                                                                                     |  |

|     |                 |                                |                                                                                                                                                                                     |                                                                                                                                                                                                                                                                                                                                                                                               |                                                                                      |
|-----|-----------------|--------------------------------|-------------------------------------------------------------------------------------------------------------------------------------------------------------------------------------|-----------------------------------------------------------------------------------------------------------------------------------------------------------------------------------------------------------------------------------------------------------------------------------------------------------------------------------------------------------------------------------------------|--------------------------------------------------------------------------------------|
| 320 | Sarcandrolide B | <i>S. glabra</i> <sup>43</sup> | a. Antimalarial effect <sup>114</sup><br>$EC_{50} 265 \pm 5 \text{ nM}$<br>b. Antitumor effect <sup>43</sup><br>$HL-60 IC_{50} 8.5 \mu\text{M}$                                     | NA                                                                                                                                                                                                                                                                                                                                                                                            | 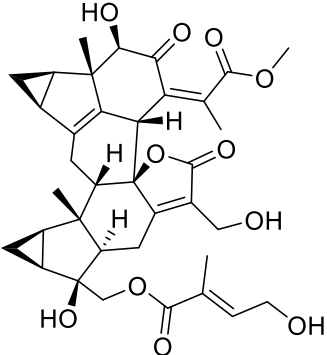  |
| 321 | Sarcandrolide A | <i>S. glabra</i> <sup>43</sup> | a. Antimalarial effect <sup>114</sup><br>$EC_{50} 320 \pm 130 \text{ nM}$<br>b. Antitumor effect <sup>43</sup><br>$A549 IC_{50} 7.2 \mu\text{M}$<br>$HL-60 IC_{50} 3.1 \mu\text{M}$ | NA                                                                                                                                                                                                                                                                                                                                                                                            |   |
| 322 | Sarcandrolide J | <i>S. glabra</i> <sup>47</sup> | Antimalarial effect <sup>114</sup><br>$EC_{50} 11400 \pm 1600 \text{ nM}$                                                                                                           | a. Synthesized from <b>R26</b> and <b>R27</b> that are converted from <b>R25</b> , which is accessible from (+)-verbenone ( <b>R20</b> ), <sup>130</sup> acid-promoted diene formation/[4 + 2] cascade, Scheme 8<br>b. Synthesized from <b>R26</b> and <b>R42</b> that are accessible from (+)-verbenone ( <b>R20</b> ), <sup>21</sup> base-mediated thermal [4 + 2] cycloaddition, Scheme 10 |  |

|     |             |                                    |                                                                                                                                                                                                                                                                                                                                                                                                                                                                       |                                                                                                                                                                                                                                                                                                                                                                                                   |                                                                                      |
|-----|-------------|------------------------------------|-----------------------------------------------------------------------------------------------------------------------------------------------------------------------------------------------------------------------------------------------------------------------------------------------------------------------------------------------------------------------------------------------------------------------------------------------------------------------|---------------------------------------------------------------------------------------------------------------------------------------------------------------------------------------------------------------------------------------------------------------------------------------------------------------------------------------------------------------------------------------------------|--------------------------------------------------------------------------------------|
| 323 | Shizukaol E | <i>C. japonicus</i> <sup>120</sup> | <p>a. Antimalarial effect<sup>114</sup><br/>EC<sub>50</sub> 1800 ± 400 nM</p> <p>b. Anti-inflammatory effect<sup>50</sup><br/>IC<sub>50</sub> 3.68 ± 0.5 μM</p> <p>c. Inhibition on HIV-1 and HCV replication<sup>131</sup></p> <p>d. Anti-neuroinflammatory effect<sup>124</sup> IC<sub>50</sub> 4.87 ± 0.50 μM</p>                                                                                                                                                  | <p>Synthesized from <b>R30</b> and <b>R32</b> that are accessible from Wieland–Miescher ketone (<b>R29</b>),<sup>22</sup> a Wittig reaction or silyl migration and lactonization to build the unsaturated lactone ring and biomimetic [4 + 2] dimerization, Scheme 9</p>                                                                                                                          | 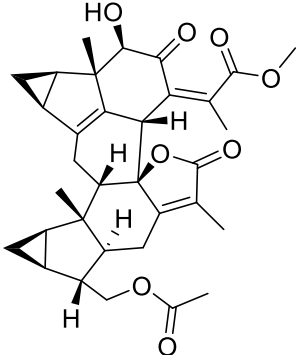  |
| 324 | Shizukaol D | <i>C. serratus</i> <sup>121</sup>  | <p>a. Antimalarial effect<sup>114</sup><br/>EC<sub>50</sub> 580 ± 90 nM</p> <p>b. Anti-inflammatory effect<sup>50</sup><br/>IC<sub>50</sub> 7.22 ± 1.1 μM</p> <p>c. Antitumor effect<sup>132</sup><br/>SMMC-7721 IC<sub>50</sub> 8.82 μM<br/>SK-HEP1 IC<sub>50</sub> 9.25 μM<br/>FOCUS IC<sub>50</sub> 6.26 μM</p> <p>d. Hypolipidemic and hypoglycemic effect<sup>133</sup></p> <p>e. Anti-neuroinflammatory effect<sup>124</sup> IC<sub>50</sub> 5.68 ± 0.04 μM</p> | <p>a. Synthesized from <b>R26</b> and <b>R27</b> that are converted from <b>R25</b>, which is accessible from (+)-verbenone (<b>R20</b>),<sup>130</sup> acid-promoted diene formation/[4 + 2] cascade, Scheme 8</p> <p>b. Synthesized from <b>R26</b> and <b>R42</b> that are accessible from (+)-verbenone (<b>R20</b>),<sup>21</sup> base-mediated thermal [4 + 2] cycloaddition, Scheme 10</p> |   |
| 325 | Shizukaol F | <i>C. japonicus</i> <sup>120</sup> | <p>a. Antimalarial effect<sup>114</sup><br/>EC<sub>50</sub> 11 ± 1 nM</p> <p>b. Antifungal effect<sup>122</sup></p> <p>c. Antitumor effect<sup>123</sup><br/>HL-60 IC<sub>50</sub> 10.28 μM</p> <p>d. Anti-HIV effect<sup>125</sup></p> <p>e. Anti-atherosclerotic effect<sup>134</sup></p> <p>f. Hypolipidemic and hypoglycemic effect<sup>135</sup></p>                                                                                                             | NA                                                                                                                                                                                                                                                                                                                                                                                                |  |

|     |                   |                                    |                                                                                                                                                                                                                                                                                                                                                 |                                                                                                                                                                                               |                                                                                      |
|-----|-------------------|------------------------------------|-------------------------------------------------------------------------------------------------------------------------------------------------------------------------------------------------------------------------------------------------------------------------------------------------------------------------------------------------|-----------------------------------------------------------------------------------------------------------------------------------------------------------------------------------------------|--------------------------------------------------------------------------------------|
| 326 | Shizukaol G       | <i>C. japonicus</i> <sup>120</sup> | a. Antimalarial effect <sup>114</sup><br>$EC_{50} 13 \pm 1 \text{ nM}$<br>b. Anti-inflammatory effect <sup>50</sup><br>$IC_{50} 1.95 \pm 0.4 \mu\text{M}$                                                                                                                                                                                       | NA                                                                                                                                                                                            | 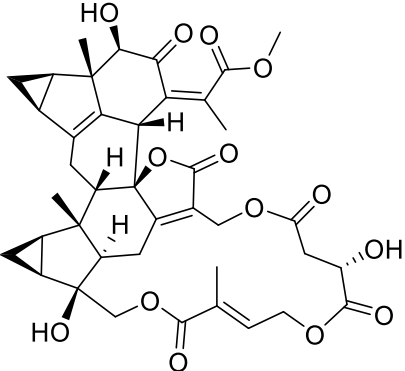  |
| 327 | Shizukaol B       | <i>C. serratus</i> <sup>121</sup>  | a. Antimalarial effect <sup>114</sup><br>$EC_{50} 27 \pm 3 \text{ nM}$<br>b. Anti-inflammatory effect <sup>50</sup><br>$IC_{50} 0.15 \pm 0.1 \mu\text{M}$<br>c. Anti-neuroinflammatory effect <sup>54,124,136</sup><br>d. Antifungal effect <sup>86</sup><br>e. Anti-HIV effect <sup>125</sup><br>f. Anti-atherosclerotic effect <sup>134</sup> | Synthesized from (+)-<br>verbenone ( <b>R20</b> ) in 20<br>steps, <sup>117</sup> MTBD-<br>mediated one-pot Z-<br>type<br>elimination/lactonizati<br>on and biomimetic [4<br>+ 2] dimerization |   |
| 328 | Spicachlorantin D | <i>C. spicatus</i> <sup>137</sup>  | Antimalarial effect <sup>114</sup><br>$EC_{50} 474 \pm 12 \text{ nM}$                                                                                                                                                                                                                                                                           | NA                                                                                                                                                                                            |  |

|     |                   |                                    |                                                                                                                                                                                                                                                                                        |                                                                                                                                                                                                                                                                                                                                                                                                                                                                                                                                                                                                                                 |                                                                                      |
|-----|-------------------|------------------------------------|----------------------------------------------------------------------------------------------------------------------------------------------------------------------------------------------------------------------------------------------------------------------------------------|---------------------------------------------------------------------------------------------------------------------------------------------------------------------------------------------------------------------------------------------------------------------------------------------------------------------------------------------------------------------------------------------------------------------------------------------------------------------------------------------------------------------------------------------------------------------------------------------------------------------------------|--------------------------------------------------------------------------------------|
| 329 | Shizukaol A       | <i>C. japonicus</i> <sup>138</sup> | <p>a. Antimalarial effect<sup>114</sup><br/>EC<sub>50</sub> 1500 ± 300 nM</p> <p>b. Anti-inflammatory effect<sup>139</sup><br/>by targeting HMGB1 to regulate the Nrf2/HO-1 signaling pathway</p> <p>c. Anti-neuroinflammatory effect<sup>124</sup> IC<sub>50</sub> 4.69 ± 0.13 μM</p> | <p>a. Synthesized from chloranthalactone A (<b>19</b>) and <b>R32</b> that are accessible from Wieland–Miescher ketone (<b>R29</b>),<sup>22</sup> a Wittig reaction or silyl migration and lactonization to build the unsaturated lactone ring and biomimetic [4 + 2] dimerization, Scheme 9</p> <p>b. Synthesized from <b>19</b> and <b>R42</b> that are accessible from (+)-verbenone (<b>R20</b>),<sup>21</sup> base-mediated thermal [4 + 2] cycloaddition, Scheme 10</p> <p>c. Synthesized from <b>19</b> and <b>R62</b> that are accessible from <b>R20</b>,<sup>140</sup> biomimetic [4 + 2] dimerization, Scheme 12</p> | 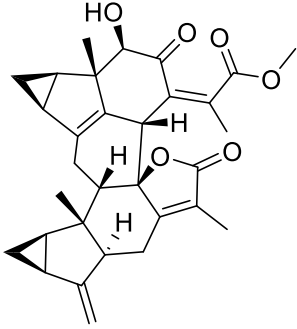  |
| 330 | Chloramultilide B | <i>C. spicatus</i> <sup>141</sup>  | <p>a. Antimalarial effect<sup>114</sup><br/>EC<sub>50</sub> 7100 ± 1000 nM</p> <p>b. Antifungal effect<sup>141</sup><br/>MIC 0.068 μM</p>                                                                                                                                              | NA                                                                                                                                                                                                                                                                                                                                                                                                                                                                                                                                                                                                                              |  |

|     |                  |                                      |                                                                                                                                                                |    |                                                                                      |
|-----|------------------|--------------------------------------|----------------------------------------------------------------------------------------------------------------------------------------------------------------|----|--------------------------------------------------------------------------------------|
| 331 | Sarcaglabrin C   | <i>S. glabra</i> <sup>142</sup>      | Antimalarial effect <sup>116</sup><br>EC <sub>50</sub> > 2000 nM                                                                                               | NA | 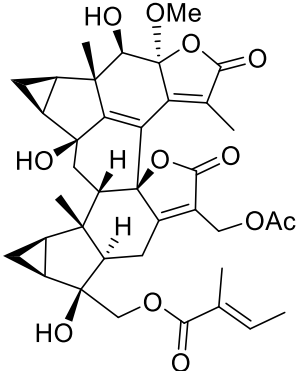  |
| 332 | Chlorahololide F | <i>C. holostegius</i> <sup>127</sup> | a. Antimalarial effect <sup>116</sup><br>EC <sub>50</sub> > 2000 nM<br>b. Selective potassium channel blocker <sup>127</sup><br>IC <sub>50</sub> 57.5 ± 6.1 μM | NA |   |
| 333 | Sarglabolide C   | <i>S. glabra</i> <sup>118</sup>      | Antimalarial effect <sup>116</sup><br>EC <sub>50</sub> 9.7 ± 1.3 nM                                                                                            | NA |  |

|     |                  |                                      |                                                                                                                                                                          |    |                                                                                      |
|-----|------------------|--------------------------------------|--------------------------------------------------------------------------------------------------------------------------------------------------------------------------|----|--------------------------------------------------------------------------------------|
| 334 | Henriol C        | <i>C. henryi</i> <sup>128</sup>      | a. Antimalarial effect <sup>116</sup><br>$EC_{50}$ 102 ± 8 nM<br>b. Antitumor effect <sup>128</sup><br>Bel-7402 $IC_{50}$ 1.40 $\mu$ M<br>BGC-823 $IC_{50}$ 3.20 $\mu$ M | NA | 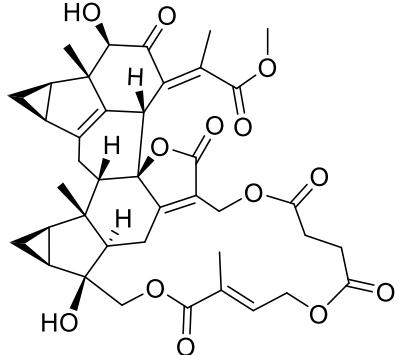  |
| 335 | Sarcandrolide E  | <i>S. glabra</i> <sup>43</sup>       | NA                                                                                                                                                                       | NA |   |
| 336 | Chlorahololide A | <i>C. holostegius</i> <sup>143</sup> | Selective potassium channel<br>blocker <sup>143</sup><br>$IC_{50}$ 10.9 ± 12.3 $\mu$ M                                                                                   | NA |  |



|     |                   |                                       |                                                                                      |    |                                                                                                                                                                                                                                                                                                                                                                                                                                                                                         |
|-----|-------------------|---------------------------------------|--------------------------------------------------------------------------------------|----|-----------------------------------------------------------------------------------------------------------------------------------------------------------------------------------------------------------------------------------------------------------------------------------------------------------------------------------------------------------------------------------------------------------------------------------------------------------------------------------------|
| 337 | Chlorahololide C  | <i>C. holostegius</i> <sup>127</sup>  | Selective potassium channel blocker <sup>127</sup><br>IC <sub>50</sub> 3.6 ± 10.1 μM | NA | 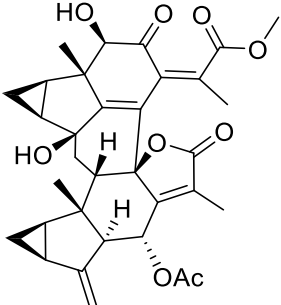 <p>The structure of Chlorahololide C is a complex polycyclic molecule. It features a central bicyclic core with two fused rings. The structure is highly substituted with various functional groups, including hydroxyl groups (HO), a methoxy group (OCH<sub>3</sub>), and an acetoxy group (OAc). The stereochemistry is indicated with wedges and dashes.</p>                                    |
| 338 | Chloramultilide A | <i>C. multistachys</i> <sup>144</sup> | Antifungal effect <sup>86</sup>                                                      | NA |  <p>The structure of Chloramultilide A is a complex polycyclic molecule. It features a central bicyclic core with two fused rings. The structure is highly substituted with various functional groups, including hydroxyl groups (HO), a methoxy group (OCH<sub>3</sub>), and a long chain containing an ester group and a double bond. The stereochemistry is indicated with wedges and dashes.</p> |
| 339 | Sarcandrolide D   | <i>S. glabra</i> <sup>43</sup>        | NA                                                                                   | NA |  <p>The structure of Sarcandrolide D is a complex polycyclic molecule. It features a central bicyclic core with two fused rings. The structure is highly substituted with various functional groups, including hydroxyl groups (HO), a methoxy group (OCH<sub>3</sub>), and an acetoxy group (OAc). The stereochemistry is indicated with wedges and dashes.</p>                                    |

|     |                                             |                                                                       |                                                                                                             |    |                                                                                      |
|-----|---------------------------------------------|-----------------------------------------------------------------------|-------------------------------------------------------------------------------------------------------------|----|--------------------------------------------------------------------------------------|
| 340 | Chloramultilide D<br>Henriol B <sup>#</sup> | <i>C. spicatus</i> <sup>141</sup><br><i>C. henryi</i> <sup>128#</sup> | NA                                                                                                          | NA | 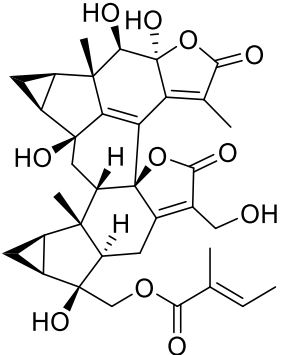  |
| 341 | Chlorahololide E                            | <i>C. holostegius</i> <sup>127</sup>                                  | Selective potassium channel blocker <sup>127</sup> IC <sub>50</sub> 27.5 ± 5.1 μM                           | NA |   |
| 342 | Chloramultilide C<br>Henriol A <sup>#</sup> | <i>C. spicatus</i> <sup>141</sup><br><i>C. henryi</i> <sup>128#</sup> | a. Hepatoprotective effect <sup>128</sup><br>IC <sub>50</sub> 0.19 μM<br>b. Antifungal effect <sup>86</sup> | NA |  |

|     |                   |                                   |    |    |                                                                                                                                                                                                                                                                                                                                                                                                                                                                                                                                      |
|-----|-------------------|-----------------------------------|----|----|--------------------------------------------------------------------------------------------------------------------------------------------------------------------------------------------------------------------------------------------------------------------------------------------------------------------------------------------------------------------------------------------------------------------------------------------------------------------------------------------------------------------------------------|
| 343 | Spicachlorantin B | <i>C. spicatus</i> <sup>145</sup> | NA | NA | 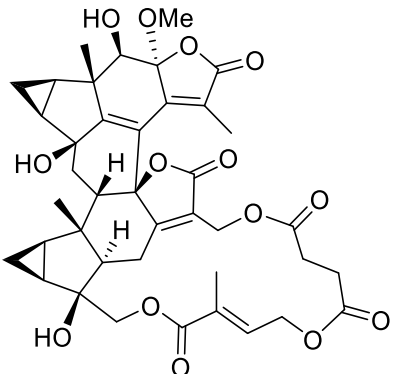 <p>The structure of Spicachlorantin B is a complex polycyclic molecule. It features a central pentacyclic core with a bicyclic system fused to a five-membered ring. This core is substituted with several hydroxyl groups (HO) and a methoxy group (OMe). A prominent feature is a long, branched side chain that includes a diene system and a lactone ring, which is further substituted with a methyl group and another hydroxyl group.</p>  |
| 344 | Spicachlorantin G | <i>C. spicatus</i> <sup>146</sup> | NA | NA |  <p>The structure of Spicachlorantin G is a complex polycyclic molecule. It features a central pentacyclic core with a bicyclic system fused to a five-membered ring. This core is substituted with several hydroxyl groups (HO) and a methoxy group (OMe). A prominent feature is a long, branched side chain that includes a diene system and a lactone ring, which is further substituted with a methyl group and another hydroxyl group.</p>  |
| 345 | Spicachlorantin H | <i>C. spicatus</i> <sup>146</sup> | NA | NA |  <p>The structure of Spicachlorantin H is a complex polycyclic molecule. It features a central pentacyclic core with a bicyclic system fused to a five-membered ring. This core is substituted with several hydroxyl groups (HO) and a methoxy group (OMe). A prominent feature is a long, branched side chain that includes a diene system and a lactone ring, which is further substituted with a methyl group and another hydroxyl group.</p> |

|     |                   |                                   |                                 |    |  |
|-----|-------------------|-----------------------------------|---------------------------------|----|--|
| 346 | Spicachlorantin I | <i>C. spicatus</i> <sup>146</sup> | NA                              | NA |  |
| 347 | Spicachlorantin J | <i>C. spicatus</i> <sup>146</sup> | NA                              | NA |  |
| 348 | Spicachlorantin A | <i>C. spicatus</i> <sup>145</sup> | Antifungal effect <sup>86</sup> | NA |  |

|     |                   |                                   |    |    |                                                                                                                                                                                                                                                                                                                                                                                                                                  |
|-----|-------------------|-----------------------------------|----|----|----------------------------------------------------------------------------------------------------------------------------------------------------------------------------------------------------------------------------------------------------------------------------------------------------------------------------------------------------------------------------------------------------------------------------------|
| 349 | Spicachlorantin C | <i>C. spicatus</i> <sup>137</sup> | NA | NA | 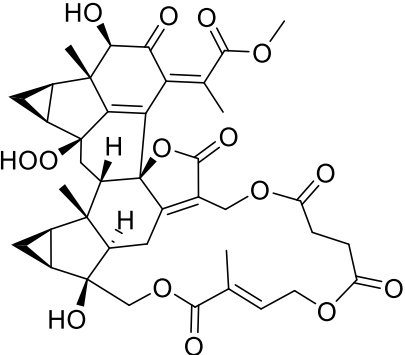 <p>The structure of Spicachlorantin C is a complex polycyclic molecule. It features a central bicyclic core with multiple stereocenters. Substituents include a hydroxyl group (HO), a carboxylic acid group (HOO), a methyl ester group (COOMe), and a long-chain side chain containing an alkene and a terminal carboxylic acid group.</p> |
| 350 | Spicachlorantin E | <i>C. spicatus</i> <sup>137</sup> | NA | NA |  <p>The structure of Spicachlorantin E is similar to Spicachlorantin C. It features the same bicyclic core and substituents, but with an acetate group (OAc) instead of the long-chain side chain. It also has a hydroxyl group (HO), a carboxylic acid group (HOO), and a methyl ester group (COOMe).</p>                                    |
| 351 | Spicachlorantin F | <i>C. spicatus</i> <sup>137</sup> | NA | NA |  <p>The structure of Spicachlorantin F is similar to Spicachlorantin E. It features the same bicyclic core and substituents, but with a hydroxyl group (OH) instead of the acetate group (OAc). It also has a hydroxyl group (HO), a carboxylic acid group (HOO), and a methyl ester group (COOMe).</p>                                      |

|     |                |                                    |                                                                             |    |                                                                                                                                                                                                                                                                                                                                                                                                                                                                  |
|-----|----------------|------------------------------------|-----------------------------------------------------------------------------|----|------------------------------------------------------------------------------------------------------------------------------------------------------------------------------------------------------------------------------------------------------------------------------------------------------------------------------------------------------------------------------------------------------------------------------------------------------------------|
| 352 | Chlojapolide A | <i>C. japonicus</i> <sup>147</sup> | Anti-inflammatory effect <sup>147</sup><br>IC <sub>50</sub> 11.64 ± 0.12 μM | NA | 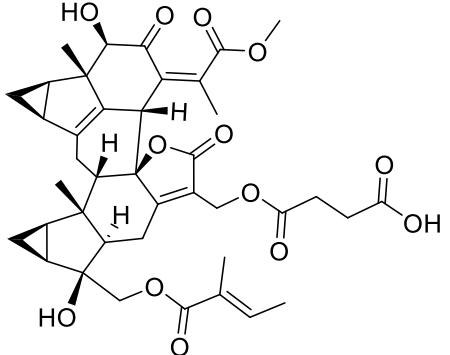 <p>The structure of Chlojapolide A is a complex polycyclic molecule. It features a central core with multiple fused rings, including a decalin system. Substituents include a hydroxyl group (HO), a methyl ester group (CO<sub>2</sub>Me), a propionic acid chain (CH<sub>2</sub>CH<sub>2</sub>COOH), and a side chain with a terminal vinyl group (CH=CH<sub>2</sub>).</p> |
| 353 | Chlojapolide B | <i>C. japonicus</i> <sup>147</sup> | Anti-inflammatory effect <sup>147</sup><br>IC <sub>50</sub> 26.29 ± 0.64 μM | NA |  <p>The structure of Chlojapolide B is a complex polycyclic molecule. It features a central core with multiple fused rings, including a decalin system. Substituents include a hydroxyl group (OH), a methyl ester group (CO<sub>2</sub>Me), and a vinyl group (CH=CH<sub>2</sub>).</p>                                                                                       |
| 354 | Chlojapolide C | <i>C. japonicus</i> <sup>147</sup> | Anti-inflammatory effect <sup>147</sup><br>IC <sub>50</sub> 26.54 ± 1.15 μM | NA |  <p>The structure of Chlojapolide C is a complex polycyclic molecule. It features a central core with multiple fused rings, including a decalin system. Substituents include a hydroxyl group (HO), a methyl ester group (CO<sub>2</sub>Me), and a vinyl group (CH=CH<sub>2</sub>).</p>                                                                                      |

|     |                |                                    |                                                                             |    |                                                                                      |
|-----|----------------|------------------------------------|-----------------------------------------------------------------------------|----|--------------------------------------------------------------------------------------|
| 355 | Chlojapolide D | <i>C. japonicus</i> <sup>147</sup> | Anti-inflammatory effect <sup>147</sup><br>IC <sub>50</sub> 25.05 ± 0.73 μM | NA | 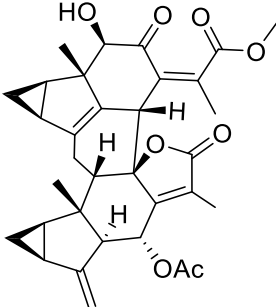  |
| 356 | Chlojapolide E | <i>C. japonicus</i> <sup>147</sup> | Anti-inflammatory effect <sup>147</sup><br>IC <sub>50</sub> 46.48 ± 1.73 μM | NA |   |
| 357 | Chlojapolide F | <i>C. japonicus</i> <sup>147</sup> | Anti-inflammatory effect <sup>147</sup><br>IC <sub>50</sub> 24.44 ± 1.91 μM | NA |  |

|     |                     |                                    |                                                                             |    |                                                                                      |
|-----|---------------------|------------------------------------|-----------------------------------------------------------------------------|----|--------------------------------------------------------------------------------------|
| 358 | Chlojapolide G      | <i>C. japonicus</i> <sup>147</sup> | NA                                                                          | NA | 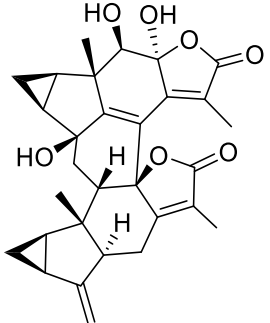  |
| 359 | Chlojapolide H      | <i>C. japonicus</i> <sup>147</sup> | Anti-inflammatory effect <sup>147</sup><br>IC <sub>50</sub> 39.37 ± 2.00 μM | NA |   |
| 360 | Shizukaol A acetate | <i>C. japonicus</i> <sup>138</sup> | NA                                                                          | NA |  |



|     |                                 |                                          |                                 |    |                                                                                      |
|-----|---------------------------------|------------------------------------------|---------------------------------|----|--------------------------------------------------------------------------------------|
| 361 | Shizukaol H                     | <i>C. japonicus</i> <sup>120</sup>       | Anti-HIV effect <sup>125</sup>  | NA | 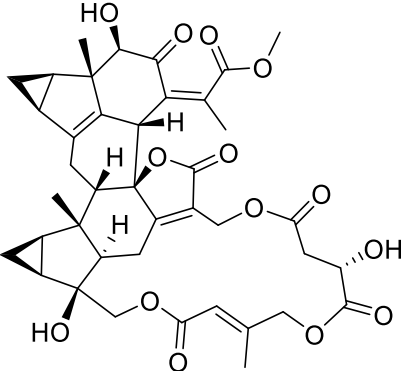  |
| 362 | Tianmushanol                    | <i>C. tianmushanensis</i> <sup>148</sup> | Antifungal effect <sup>86</sup> | NA |   |
| 363 | 8- <i>O</i> -Methyltianmushanol | <i>C. tianmushanensis</i> <sup>148</sup> | Antifungal effect <sup>86</sup> | NA |  |

|     |                    |                                    |    |    |                                                                                                                                                                                                                                                                                                                                                                                                                                                                                                                                                              |
|-----|--------------------|------------------------------------|----|----|--------------------------------------------------------------------------------------------------------------------------------------------------------------------------------------------------------------------------------------------------------------------------------------------------------------------------------------------------------------------------------------------------------------------------------------------------------------------------------------------------------------------------------------------------------------|
| 364 | Chlorajaponilide I | <i>C. japonicus</i> <sup>76</sup>  | NA | NA | 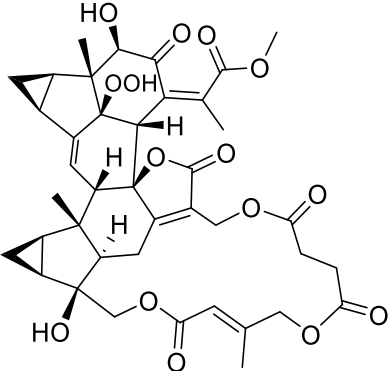 <p>The structure of Chlorajaponilide I is a complex polycyclic molecule. It features a central bicyclic core with multiple stereocenters. Key features include a hydroxyl group (HO) at the top, a hydroperoxide group (OOH) on the left, and a methoxy group (OCH<sub>3</sub>) on the right. The molecule is highly substituted with various oxygen-containing functional groups and a long, branched side chain containing a double bond and several oxygen atoms.</p> |
| 365 | Chlorajaponilide A | <i>C. japonicus</i> <sup>125</sup> | NA | NA |  <p>The structure of Chlorajaponilide A is very similar to Chlorajaponilide I. It has the same polycyclic core and side chain. The main difference is the absence of the hydroperoxide group (OOH) and the presence of a hydroxyl group (OH) at the top position. The methoxy group (OCH<sub>3</sub>) is also present on the right side.</p>                                                                                                                              |
| 366 | Chlorajaponilide B | <i>C. japonicus</i> <sup>125</sup> | NA | NA |  <p>The structure of Chlorajaponilide B is also very similar to the other two. It features the same polycyclic core and side chain. The main difference is the presence of a hydroxyl group (OH) at the top position and the absence of the hydroperoxide group (OOH). The methoxy group (OCH<sub>3</sub>) is also present on the right side.</p>                                                                                                                        |

|     |                    |                                    |    |    |                                                                                                                                                                                                                                                                                                                                                                                                                                                                                                                |
|-----|--------------------|------------------------------------|----|----|----------------------------------------------------------------------------------------------------------------------------------------------------------------------------------------------------------------------------------------------------------------------------------------------------------------------------------------------------------------------------------------------------------------------------------------------------------------------------------------------------------------|
| 367 | Chlorajaponilide D | <i>C. japonicus</i> <sup>125</sup> | NA | NA | 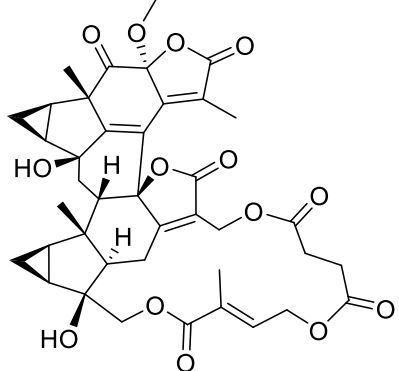 <p>The structure of Chlorajaponilide D is a complex polycyclic molecule. It features a central tricyclic core with two hydroxyl groups (HO) and two hydrogen atoms (H) explicitly shown. The core is substituted with a methoxy group (OCH<sub>3</sub>) and a methyl group (CH<sub>3</sub>). A long, branched side chain is attached to the core, containing an ester group, a double bond, and another ester group.</p>   |
| 368 | Chlorajaponilide E | <i>C. japonicus</i> <sup>125</sup> | NA | NA |  <p>The structure of Chlorajaponilide E is a complex polycyclic molecule. It features a central tricyclic core with two hydroxyl groups (HO) and two hydrogen atoms (H) explicitly shown. The core is substituted with a methoxy group (OCH<sub>3</sub>) and a methyl group (CH<sub>3</sub>). A long, branched side chain is attached to the core, containing a hydroxyl group (HO), an ester group, and a double bond.</p> |
| 369 | Chlorajaponol      | <i>C. japonicus</i> <sup>31</sup>  | NA | NA |  <p>The structure of Chlorajaponol is a complex polycyclic molecule. It features a central tricyclic core with two hydroxyl groups (HO) and two hydrogen atoms (H) explicitly shown. The core is substituted with a methoxy group (OCH<sub>3</sub>) and a methyl group (CH<sub>3</sub>). A long, branched side chain is attached to the core, containing an ester group, a double bond, and another ester group.</p>       |

|     |             |                                   |    |    |                                                                                      |
|-----|-------------|-----------------------------------|----|----|--------------------------------------------------------------------------------------|
| 370 | Yinxiancaol | <i>C. japonicus</i> <sup>75</sup> | NA | NA | 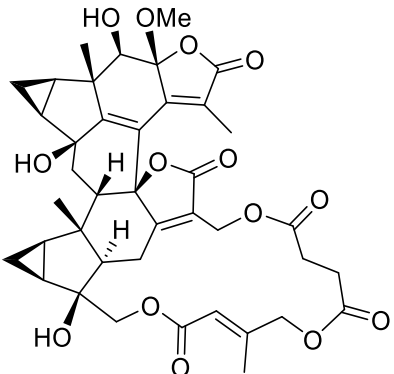  |
| 371 | Shizukaol P | <i>C. fortunei</i> <sup>35</sup>  | NA | NA |   |
| 372 | Shizukaol L | <i>C. fortunei</i> <sup>119</sup> | NA | NA |  |

|     |                  |                                      |                                                                                   |    |                                                                                      |
|-----|------------------|--------------------------------------|-----------------------------------------------------------------------------------|----|--------------------------------------------------------------------------------------|
| 373 | Shizukaol O      | <i>C. fortunei</i> <sup>119</sup>    | Anti-inflammatory effect <sup>50</sup><br>IC <sub>50</sub> 1.95 ± 0.3 μM          | NA | 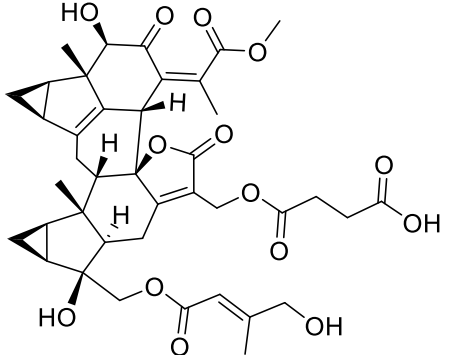  |
| 374 | Chlorahololide B | <i>C. holostegius</i> <sup>143</sup> | Selective potassium channel blocker <sup>143</sup> IC <sub>50</sub> 18.6 ± 2.5 μM | NA |   |
| 375 | Chololactone A   | <i>C. holostegius</i> <sup>149</sup> | Anti-inflammatory effect <sup>149</sup><br>IC <sub>50</sub> 35.4 ± 1.5 μM         | NA |  |

|     |                |                                       |                                                                           |    |                                                                                      |
|-----|----------------|---------------------------------------|---------------------------------------------------------------------------|----|--------------------------------------------------------------------------------------|
| 376 | Chololactone B | <i>C. holostegius</i> <sup>149</sup>  | NA                                                                        | NA | 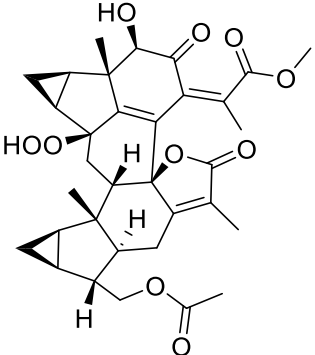  |
| 377 | Chololactone D | <i>C. holostegius</i> <sup>149</sup>  | Anti-inflammatory effect <sup>149</sup><br>IC <sub>50</sub> 20.0 ± 2.6 μM | NA |   |
| 378 | Multistalide A | <i>C. multistachys</i> <sup>150</sup> | NA                                                                        | NA |  |

|     |                |                                       |                                                                     |                                                                                                                                                                        |                                                                                      |
|-----|----------------|---------------------------------------|---------------------------------------------------------------------|------------------------------------------------------------------------------------------------------------------------------------------------------------------------|--------------------------------------------------------------------------------------|
| 379 | Multistalide B | <i>C. multistachys</i> <sup>150</sup> | NA                                                                  | Synthesized from <b>R42</b> and <b>R45</b> that are accessible from (+)-verbenone ( <b>R20</b> ), <sup>21</sup> base-mediated thermal [4 + 2] cycloaddition, Scheme 10 | 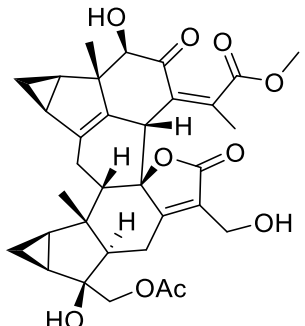  |
| 380 | Fortulactone A | <i>C. fortunei</i> <sup>151</sup>     | Anti-inflammatory effect <sup>151</sup><br>IC <sub>50</sub> 8.5 μM  | NA                                                                                                                                                                     |   |
| 381 | Fortulactone B | <i>C. fortunei</i> <sup>151</sup>     | Anti-inflammatory effect <sup>151</sup><br>IC <sub>50</sub> 23.4 μM | NA                                                                                                                                                                     |  |

|     |                |                                   |    |    |                                                                                                                                                                                                                                                                                                                                                                                                                                        |
|-----|----------------|-----------------------------------|----|----|----------------------------------------------------------------------------------------------------------------------------------------------------------------------------------------------------------------------------------------------------------------------------------------------------------------------------------------------------------------------------------------------------------------------------------------|
| 382 | Fortulactone C | <i>C. fortunei</i> <sup>151</sup> | NA | NA | 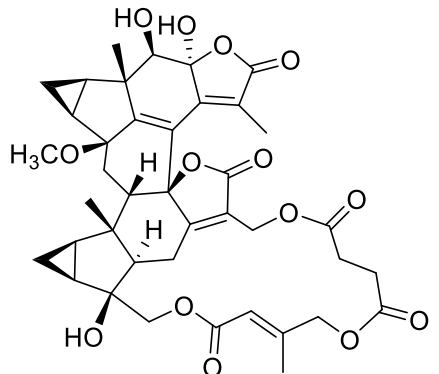 <p>The structure of Fortulactone C is a complex polycyclic molecule. It features a central bicyclic core with multiple stereocenters. Key substituents include a methoxy group (H<sub>3</sub>CO), a hydroxyl group (HO), and a lactone ring. A long side chain is attached to the core, containing a double bond and a terminal lactone group.</p> |
| 383 | Fortulactone D | <i>C. fortunei</i> <sup>151</sup> | NA | NA |  <p>The structure of Fortulactone D is similar to Fortulactone C but lacks the methoxy group. It features a hydroxyl group (HO) and a methyl ester group (COOCH<sub>3</sub>) on the bicyclic core. The side chain is identical to that of Fortulactone C, containing a double bond and a terminal lactone group.</p>                                |
| 384 | Fortulactone E | <i>C. fortunei</i> <sup>151</sup> | NA | NA |  <p>The structure of Fortulactone E is similar to Fortulactone D but has a different side chain. It features a hydroxyl group (HO) and a methyl ester group (COOCH<sub>3</sub>) on the bicyclic core. The side chain contains a double bond, a hydroxyl group (HO), and a terminal ethyl ester group (COOCH<sub>2</sub>CH<sub>3</sub>).</p>        |



|     |               |                                      |                                                                            |    |                                                                                      |
|-----|---------------|--------------------------------------|----------------------------------------------------------------------------|----|--------------------------------------------------------------------------------------|
| 385 | Chlomultiol A | <i>C. multistachys</i> <sup>85</sup> | Anti-inflammatory effect <sup>85</sup><br>IC <sub>50</sub> 3.34 ± 0.73 μM  | NA | 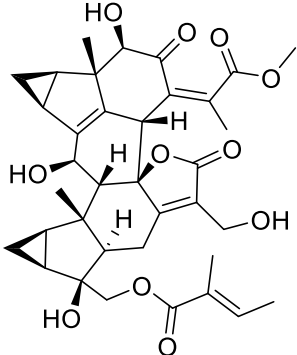  |
| 386 | Chlomultiol B | <i>C. multistachys</i> <sup>85</sup> | Anti-inflammatory effect <sup>85</sup><br>IC <sub>50</sub> 15.06 ± 1.08 μM | NA |   |
| 387 | Chlomultiol C | <i>C. multistachys</i> <sup>85</sup> | Anti-inflammatory effect <sup>85</sup><br>IC <sub>50</sub> 13.13 ± 3.99 μM | NA |  |

|     |               |                                      |    |    |                                                                                                                                                                                                                                                                                                                                                                                                                                                               |
|-----|---------------|--------------------------------------|----|----|---------------------------------------------------------------------------------------------------------------------------------------------------------------------------------------------------------------------------------------------------------------------------------------------------------------------------------------------------------------------------------------------------------------------------------------------------------------|
| 388 | Sarcanolide A | <i>S. hainanensis</i> <sup>152</sup> | NA | NA |  <p>The structure of Sarcanolide A is a complex polycyclic molecule. It features a central bicyclic core with multiple stereocenters. Key functional groups include a methyl ester group (OMe), a hydroxyl group (HO), and a side chain containing a terminal vinyl group and a methyl group. The stereochemistry is indicated with wedged and dashed bonds.</p>           |
| 389 | Sarcanolide B | <i>S. hainanensis</i> <sup>152</sup> | NA | NA |  <p>The structure of Sarcanolide B is very similar to Sarcanolide A, sharing the same core and most substituents. The primary difference lies in the stereochemistry of the side chain, specifically the orientation of the vinyl and methyl groups, which is reflected in the different wedge/dash configurations at the corresponding carbon atoms.</p>                  |
| 390 | Sarglafuran A | <i>S. glabra</i> <sup>153</sup>      | NA | NA |  <p>The structure of Sarglafuran A is a highly complex polycyclic molecule. It features a central bicyclic core with multiple stereocenters. Key functional groups include a methyl ester group (COOMe), a hydroxyl group (HO), and a side chain containing a terminal vinyl group and a methyl group. The stereochemistry is indicated with wedged and dashed bonds.</p> |

|     |               |                                 |                                                                             |    |                                                                                                                                                                                                                                                                                                                                                                                                                                                                                                                        |
|-----|---------------|---------------------------------|-----------------------------------------------------------------------------|----|------------------------------------------------------------------------------------------------------------------------------------------------------------------------------------------------------------------------------------------------------------------------------------------------------------------------------------------------------------------------------------------------------------------------------------------------------------------------------------------------------------------------|
| 391 | Sarcanolide C | <i>S. glabra</i> <sup>154</sup> | Anti-inflammatory effect <sup>154</sup><br>IC <sub>50</sub> 16.60 ± 0.13 μM | NA | 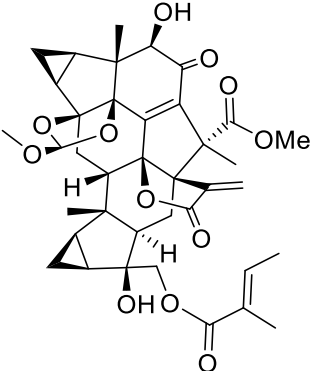 <p>The structure of Sarcanolide C is a complex polycyclic molecule. It features a central ring system with multiple stereocenters. Key substituents include a hydroxyl group (OH) at the top, a methoxy ester group (OMe) on the right, and a propenoic acid derivative (HO-C(=O)-CH=CH-CH<sub>3</sub>) at the bottom. The structure is highly substituted with various oxygen-containing functional groups and methyl groups.</p> |
| 392 | Sarcanolide D | <i>S. glabra</i> <sup>154</sup> | Anti-inflammatory effect <sup>154</sup><br>IC <sub>50</sub> 13.43 ± 0.34 μM | NA |  <p>The structure of Sarcanolide D is similar to Sarcanolide C but with a different substitution pattern. It features a hydroxyl group (OH) at the top, a methoxy ester group (OMe) on the right, and a propenoic acid derivative (HO-C(=O)-CH=CH-CH<sub>3</sub>) at the bottom. The stereochemistry and ring fusion are distinct from Sarcanolide C.</p>                                                                           |
| 393 | Sarcanolide E | <i>S. glabra</i> <sup>154</sup> | Anti-inflammatory effect <sup>154</sup><br>IC <sub>50</sub> 17.19 ± 0.31 μM | NA |  <p>The structure of Sarcanolide E is a complex polycyclic molecule. It features a central ring system with multiple stereocenters. Key substituents include hydroxyl groups (HO) at the top and bottom, an acetate ester group (OAc) on the right, and another acetate ester group (OAc) at the bottom. The structure is highly substituted with various oxygen-containing functional groups and methyl groups.</p>               |

|     |                 |                                |                                                                                                                                          |    |                                                                                      |
|-----|-----------------|--------------------------------|------------------------------------------------------------------------------------------------------------------------------------------|----|--------------------------------------------------------------------------------------|
| 394 | Sarcandrolide C | <i>S. glabra</i> <sup>43</sup> | Antitumor effect <sup>43</sup><br>A549 IC <sub>50</sub> 4.7 $\mu$ M<br>HL-60 IC <sub>50</sub> 8.5 $\mu$ M                                | NA | 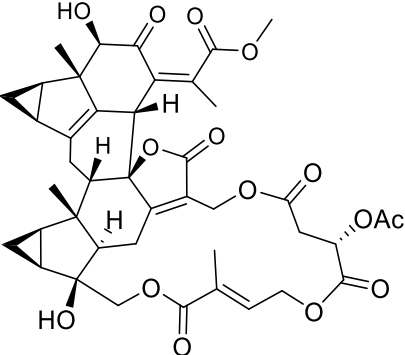  |
| 395 | Sarcandrolide F | <i>S. glabra</i> <sup>47</sup> | a. Antitumor effect <sup>47</sup><br>HL-60 IC <sub>50</sub> 0.03 $\mu$ M<br>b. Inhibition on HIV-1 and<br>HCV replication <sup>131</sup> | NA |   |
| 396 | Sarcandrolide G | <i>S. glabra</i> <sup>47</sup> | NA                                                                                                                                       | NA |  |

|     |                    |                                 |                                                                                                        |    |                                                                                      |
|-----|--------------------|---------------------------------|--------------------------------------------------------------------------------------------------------|----|--------------------------------------------------------------------------------------|
| 397 | Sarcandrolide H    | <i>S. glabra</i> <sup>47</sup>  | Antitumor effect <sup>47</sup><br>HL-60 IC <sub>50</sub> 1.2 μM                                        | NA | 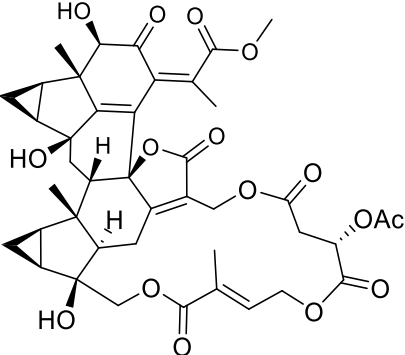  |
| 398 | Sarcandrolide I    | <i>S. glabra</i> <sup>47</sup>  | NA                                                                                                     | NA |   |
| 399 | Chlorajaponilide F | <i>S. glabra</i> <sup>131</sup> | a. Inhibition on HIV-1 and HCV replication <sup>131</sup><br>b. Anti-inflammatory effect <sup>83</sup> | NA |  |

|     |                    |                                 |                                                                     |    |                                                                                                                                                                                                                                                                                                                                                                                                                                                     |
|-----|--------------------|---------------------------------|---------------------------------------------------------------------|----|-----------------------------------------------------------------------------------------------------------------------------------------------------------------------------------------------------------------------------------------------------------------------------------------------------------------------------------------------------------------------------------------------------------------------------------------------------|
| 400 | Sarcaglabrin B     | <i>S. glabra</i> <sup>142</sup> | NA                                                                  | NA | 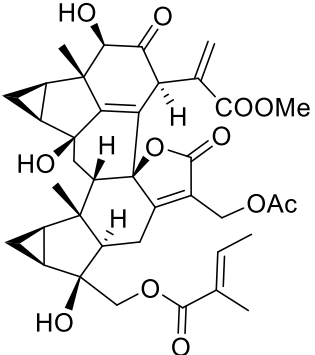 <p>The structure of Sarcaglabrin B is a complex polycyclic molecule. It features a central bicyclic core with multiple stereocenters. Substituents include a hydroxyl group (HO), a methyl ester group (COOMe), an acetate group (OAc), and a side chain with a terminal vinyl group and a methyl group.</p>                                                    |
| 401 | Chlorajaponilide G | <i>S. glabra</i> <sup>131</sup> | Inhibition on HIV-1 replication <sup>131</sup>                      | NA |  <p>The structure of Chlorajaponilide G is a complex polycyclic molecule. It features a central bicyclic core with multiple stereocenters. Substituents include a hydroxyl group (HO), a hydroperoxide group (OOH), a methyl ester group (COOMe), a hydroxymethyl group (CH<sub>2</sub>OH), and a side chain with a terminal vinyl group and a methyl group.</p> |
| 402 | Sarglabolide A     | <i>S. glabra</i> <sup>118</sup> | Anti-inflammatory effect <sup>118</sup><br>IC <sub>50</sub> 3.04 μM | NA |  <p>The structure of Sarglabolide A is a complex polycyclic molecule. It features a central bicyclic core with multiple stereocenters. Substituents include a hydroxyl group (HO), a hydroperoxide group (OOH), a methyl ester group (COOMe), a hydroxymethyl group (CH<sub>2</sub>OH), and a side chain with a terminal vinyl group and a methyl group.</p>    |

|     |                |                                 |    |    |                                                                                                                                                                                                                                                                                                                                                                                                                                                                                                           |
|-----|----------------|---------------------------------|----|----|-----------------------------------------------------------------------------------------------------------------------------------------------------------------------------------------------------------------------------------------------------------------------------------------------------------------------------------------------------------------------------------------------------------------------------------------------------------------------------------------------------------|
| 403 | Sarglabolide B | <i>S. glabra</i> <sup>118</sup> | NA | NA | 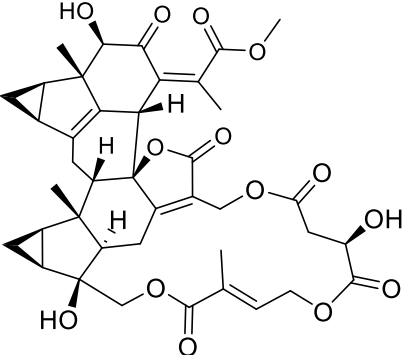 <p>The structure of Sarglabolide B is a complex polycyclic molecule. It features a central bicyclic core with multiple stereocenters. The molecule is highly substituted with various functional groups, including hydroxyl groups (HO), ester groups (COOCH<sub>3</sub>), and a long side chain containing a double bond and a terminal hydroxyl group. The stereochemistry is indicated with wedges and dashes.</p> |
| 404 | Sarglabolide D | <i>S. glabra</i> <sup>118</sup> | NA | NA |  <p>The structure of Sarglabolide D is similar to Sarglabolide B, but with a different stereochemistry at the terminal hydroxyl group of the side chain, which is shown with a dashed bond.</p>                                                                                                                                                                                                                        |
| 405 | Sarglabolide E | <i>S. glabra</i> <sup>118</sup> | NA | NA |  <p>The structure of Sarglabolide E is similar to Sarglabolide B, but with a different stereochemistry at the terminal hydroxyl group of the side chain, which is shown with a wedged bond.</p>                                                                                                                                                                                                                       |

|     |                |                                 |    |    |                                                                                                                                                                                                                                                                                                                                                                                                                                                                                                                                 |
|-----|----------------|---------------------------------|----|----|---------------------------------------------------------------------------------------------------------------------------------------------------------------------------------------------------------------------------------------------------------------------------------------------------------------------------------------------------------------------------------------------------------------------------------------------------------------------------------------------------------------------------------|
| 406 | Sarglabolide F | <i>S. glabra</i> <sup>118</sup> | NA | NA | 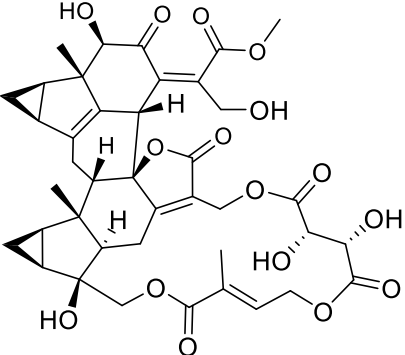 <p>The structure of Sarglabolide F is a complex polycyclic molecule. It features a central bicyclic core with multiple stereocenters, indicated by wedged and dashed bonds. The molecule is heavily substituted with various functional groups, including hydroxyl groups (HO), ester groups (COOCH<sub>3</sub>), and a long, branched side chain containing several oxygen-containing functional groups and a terminal hydroxyl group.</p> |
| 407 | Sarglabolide G | <i>S. glabra</i> <sup>118</sup> | NA | NA |  <p>The structure of Sarglabolide G is very similar to Sarglabolide F, sharing the same complex polycyclic core and many substituents. The primary difference lies in the side chain, which is shorter and lacks the terminal hydroxyl group and one of the ester groups present in Sarglabolide F.</p>                                                                                                                                      |
| 408 | Sarglabolide H | <i>S. glabra</i> <sup>118</sup> | NA | NA |  <p>The structure of Sarglabolide H is distinct from the other two, featuring a different side chain. It has a shorter side chain with a terminal hydroxyl group and a different arrangement of ester and double bond groups compared to Sarglabolide F and G.</p>                                                                                                                                                                          |



|     |                 |                                       |    |    |                                                                                      |
|-----|-----------------|---------------------------------------|----|----|--------------------------------------------------------------------------------------|
| 409 | Sarglabolide K  | <i>S. glabra</i> <sup>118</sup>       | NA | NA | 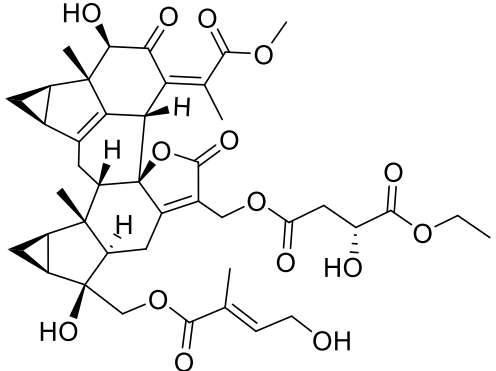  |
| 410 | Chloramultiol A | <i>C. multistachys</i> <sup>155</sup> | NA | NA |   |
| 411 | Chloramultiol B | <i>C. multistachys</i> <sup>155</sup> | NA | NA |  |

|     |                 |                                       |    |    |                                                                                      |
|-----|-----------------|---------------------------------------|----|----|--------------------------------------------------------------------------------------|
| 412 | Chloramultiol C | <i>C. multistachys</i> <sup>155</sup> | NA | NA | 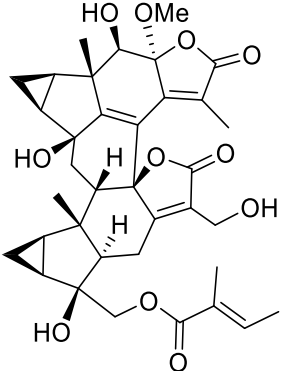  |
| 413 | Chloramultiol D | <i>C. multistachys</i> <sup>155</sup> | NA | NA |   |
| 414 | Chloramultiol E | <i>C. multistachys</i> <sup>155</sup> | NA | NA |  |

|     |                            |                                       |    |    |                                                                                                                                                                                                                                                                                                                                                                                                                                                                                                                                                                                     |
|-----|----------------------------|---------------------------------------|----|----|-------------------------------------------------------------------------------------------------------------------------------------------------------------------------------------------------------------------------------------------------------------------------------------------------------------------------------------------------------------------------------------------------------------------------------------------------------------------------------------------------------------------------------------------------------------------------------------|
| 415 | Chloramultiol F            | <i>C. multistachys</i> <sup>155</sup> | NA | NA | 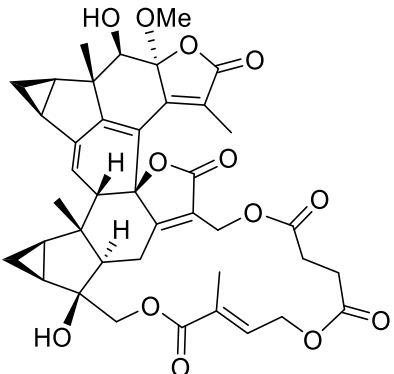 <p>The structure of Chloramultiol F is a complex polycyclic molecule. It features a central bicyclic core with two fused rings, each containing a hydrogen atom (H) with a wedge bond. The structure is substituted with a hydroxyl group (HO) and a methoxy group (OMe) on the upper ring, and another hydroxyl group (HO) on the lower ring. A long, branched side chain is attached to the lower ring, containing several oxygen atoms and a double bond, ending in a carboxylate group.</p> |
| 416 | Chloramultiol G            | <i>C. multistachys</i> <sup>71</sup>  | NA | NA |  <p>The structure of Chloramultiol G is similar to Chloramultiol F, but it lacks the methoxy group (OMe) on the upper ring. Instead, it has a different substitution pattern on the upper ring, including a carboxylate group and a methoxy group.</p>                                                                                                                                                                                                                                           |
| 417 | 8-O-Ethylspicachlorantin A | <i>C. serratus</i> <sup>72</sup>      | NA | NA |  <p>The structure of 8-O-Ethylspicachlorantin A is similar to Chloramultiol F, but it has an ethoxy group (OEt) instead of a methoxy group (OMe) on the upper ring. It also has a hydroxyl group (HO) on the upper ring.</p>                                                                                                                                                                                                                                                                    |

|     |                               |                                  |                                                                                                                                                                                      |    |                                                                                      |
|-----|-------------------------------|----------------------------------|--------------------------------------------------------------------------------------------------------------------------------------------------------------------------------------|----|--------------------------------------------------------------------------------------|
| 418 | 4,15-Dehydrochloramultilide B | <i>C. serratus</i> <sup>72</sup> | Anti-inflammatory effect <sup>72</sup><br>IC <sub>50</sub> 0.22 μM                                                                                                                   | NA | 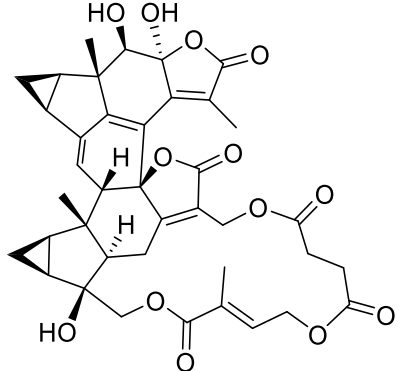  |
| 419 | Sarglaroid A                  | <i>S. glabra</i> <sup>156</sup>  | Anti-inflammatory effect <sup>156</sup><br>IC <sub>50</sub> 19.8 μM                                                                                                                  | NA |   |
| 420 | Sarglaroid B                  | <i>S. glabra</i> <sup>156</sup>  | a. Anti-inflammatory effect <sup>156</sup><br>IC <sub>50</sub> 1.92 μM <sup>156</sup><br>b. Antitumor effect<br>MCF-7 IC <sub>50</sub> 10.2 μM<br>MDA-MB-231 IC <sub>50</sub> 8.2 μM | NA |  |

|     |              |                                 |                                                                                                                                                                |    |                                                                                      |
|-----|--------------|---------------------------------|----------------------------------------------------------------------------------------------------------------------------------------------------------------|----|--------------------------------------------------------------------------------------|
| 421 | Sarglaroid C | <i>S. glabra</i> <sup>156</sup> | a. Anti-inflammatory effect <sup>156</sup><br>$IC_{50}$ 1.77 $\mu$ M<br>b. Antitumor effect<br>MCF-7 $IC_{50}$ 9.5 $\mu$ M<br>MDA-MB-231 $IC_{50}$ 5.4 $\mu$ M | NA | 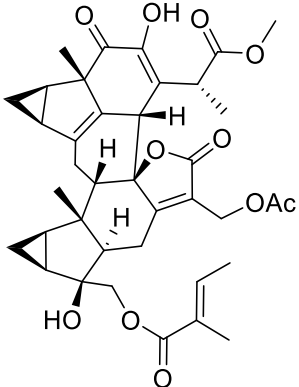  |
| 422 | Sarglaroid D | <i>S. glabra</i> <sup>156</sup> | Anti-inflammatory effect <sup>156</sup><br>$IC_{50}$ 3.04 $\mu$ M                                                                                              | NA |   |
| 423 | Sarglaroid E | <i>S. glabra</i> <sup>156</sup> | Anti-inflammatory effect <sup>156</sup><br>$IC_{50}$ 29.3 $\mu$ M                                                                                              | NA |  |

|     |              |                                 |                                                                              |    |                                                                                      |
|-----|--------------|---------------------------------|------------------------------------------------------------------------------|----|--------------------------------------------------------------------------------------|
| 424 | Sarglaroid F | <i>S. glabra</i> <sup>156</sup> | Inhibited LPS/ATP-induced IL-1 $\beta$ release in THP-1 cells <sup>156</sup> | NA | 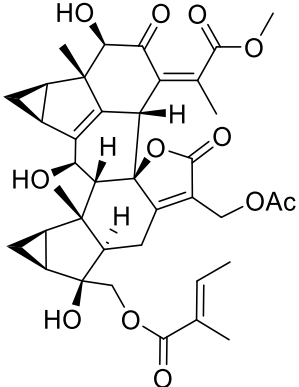  |
| 425 | Sarglaroid G | <i>S. glabra</i> <sup>156</sup> | NA                                                                           | NA |   |
| 426 | Sarglaroid H | <i>S. glabra</i> <sup>156</sup> | Anti-inflammatory effect <sup>156</sup><br>IC <sub>50</sub> 13.9 $\mu$ M     | NA |  |

|     |                 |                                      |    |    |                                                                                                                                                                                                                                                                                                                                                                                                                                                                                                                                                       |
|-----|-----------------|--------------------------------------|----|----|-------------------------------------------------------------------------------------------------------------------------------------------------------------------------------------------------------------------------------------------------------------------------------------------------------------------------------------------------------------------------------------------------------------------------------------------------------------------------------------------------------------------------------------------------------|
| 427 | Chloranholide F | <i>C. holostegius</i> <sup>124</sup> | NA | NA | 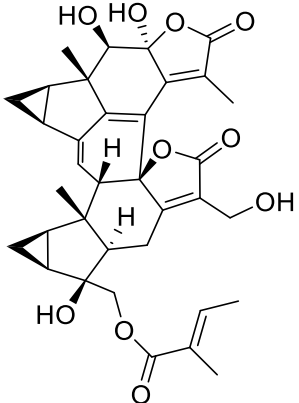 <p>The structure of Chloranholide F is a complex polycyclic molecule. It features a central bicyclic core with a bridgehead hydrogen atom labeled 'H'. The structure is heavily substituted with various functional groups, including multiple hydroxyl groups (HO), a carboxylic acid group (COOH), and a hydroxymethyl group (CH<sub>2</sub>OH). A side chain is attached to the core, consisting of an ester linkage to a vinyl group (CH=CH<sub>2</sub>).</p> |
| 428 | Chloranholide G | <i>C. holostegius</i> <sup>124</sup> | NA | NA |  <p>The structure of Chloranholide G is very similar to Chloranholide F, sharing the same core and side chain. However, it differs in the placement of its hydroxyl groups. Specifically, it has a hydroxyl group (HO) at a different position on the bicyclic core compared to Chloranholide F.</p>                                                                                                                                                               |
| 429 | Chloranholide H | <i>C. holostegius</i> <sup>124</sup> | NA | NA |  <p>The structure of Chloranholide H is distinct from the other two. It features a different bicyclic core with a bridgehead hydrogen atom labeled 'H'. It has a hydroxyl group (HO) at the bottom position and a side chain that includes a methyl ester group (COOCH<sub>3</sub>) and a vinyl group (CH=CH<sub>2</sub>).</p>                                                                                                                                    |

|     |                 |                                      |    |    |                                                                                                                                                                                                                                                                                                                                                                                                                                                                                                                 |
|-----|-----------------|--------------------------------------|----|----|-----------------------------------------------------------------------------------------------------------------------------------------------------------------------------------------------------------------------------------------------------------------------------------------------------------------------------------------------------------------------------------------------------------------------------------------------------------------------------------------------------------------|
| 430 | Chloranholide I | <i>C. holostegius</i> <sup>124</sup> | NA | NA | 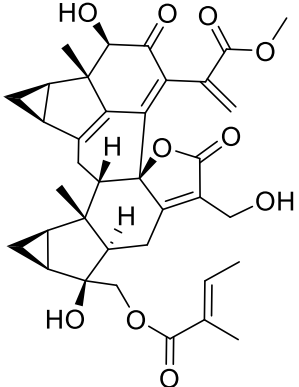 <p>The structure of Chloranholide I is a complex polycyclic molecule. It features a central bicyclic core with two fused cyclopropane rings. The structure is heavily substituted with various functional groups, including hydroxyl groups (HO), a methoxy group (OCH<sub>3</sub>), a hydroxymethyl group (CH<sub>2</sub>OH), and an isopentenyl ester group. The stereochemistry is indicated with wedges and dashes.</p> |
| 431 | Chloranholide J | <i>C. holostegius</i> <sup>124</sup> | NA | NA |  <p>The structure of Chloranholide J is very similar to Chloranholide I, but it lacks the methoxy group and has a different stereochemistry at the top hydroxyl group, which is shown with a dashed bond.</p>                                                                                                                                                                                                                |
| 432 | Chloranholide K | <i>C. holostegius</i> <sup>124</sup> | NA | NA |  <p>The structure of Chloranholide K is similar to the previous two, but it features an acetoxy group (OAc) instead of the isopentenyl ester group at the bottom position. It also has a different stereochemistry at the top hydroxyl group, which is shown with a dashed bond.</p>                                                                                                                                        |



|     |                 |                                      |    |    |                                                                                                                                                                                                                                                                                                                                                                                                                                                                                                      |
|-----|-----------------|--------------------------------------|----|----|------------------------------------------------------------------------------------------------------------------------------------------------------------------------------------------------------------------------------------------------------------------------------------------------------------------------------------------------------------------------------------------------------------------------------------------------------------------------------------------------------|
| 433 | Chloranholide L | <i>C. holostegius</i> <sup>124</sup> | NA | NA | 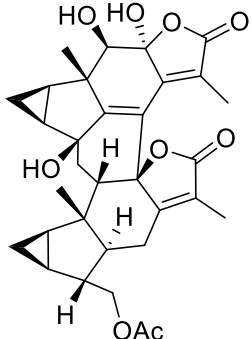 <p>The structure of Chloranholide L is a complex polycyclic molecule. It features a central bicyclic core with a bridgehead oxygen atom. The structure is substituted with two hydroxyl groups (HO) and two acetoxy groups (OAc). The stereochemistry is indicated by wedged and dashed bonds, showing a specific three-dimensional arrangement of the substituents.</p>                                         |
| 434 | Chloranholide M | <i>C. holostegius</i> <sup>124</sup> | NA | NA |  <p>The structure of Chloranholide M is a complex polycyclic molecule, very similar to Chloranholide L. It features a central bicyclic core with a bridgehead oxygen atom. The structure is substituted with two hydroxyl groups (HO) and two acetoxy groups (OAc). The stereochemistry is indicated by wedged and dashed bonds, showing a specific three-dimensional arrangement of the substituents.</p>        |
| 435 | Chloranholide N | <i>C. holostegius</i> <sup>124</sup> | NA | NA |  <p>The structure of Chloranholide N is a complex polycyclic molecule, very similar to Chloranholide L and M. It features a central bicyclic core with a bridgehead oxygen atom. The structure is substituted with two hydroxyl groups (HO) and two acetoxy groups (OAc). The stereochemistry is indicated by wedged and dashed bonds, showing a specific three-dimensional arrangement of the substituents.</p> |

|     |                 |                                      |    |    |                                                                                                                                                                                                                                                                                                                                                                                                                                      |
|-----|-----------------|--------------------------------------|----|----|--------------------------------------------------------------------------------------------------------------------------------------------------------------------------------------------------------------------------------------------------------------------------------------------------------------------------------------------------------------------------------------------------------------------------------------|
| 436 | Chloranholide O | <i>C. holostegius</i> <sup>124</sup> | NA | NA | 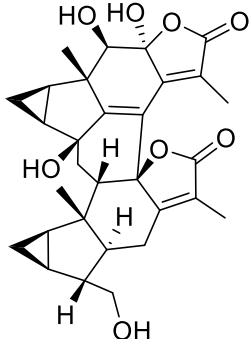 <p>The structure of Chloranholide O is a complex polycyclic molecule. It features a central bicyclic core with a bridgehead oxygen atom. The structure is substituted with two hydroxyl groups (HO) at the top, a methyl group, and a carboxylate group (COO). The bottom part of the molecule has a hydroxyl group (HO) and a methyl group.</p> |
| 437 | Chloranholide P | <i>C. holostegius</i> <sup>124</sup> | NA | NA |  <p>The structure of Chloranholide P is similar to Chloranholide O but includes an acetoxy group (OAc) and a hydroxyl group (HO) on the right side of the molecule. It also has a methyl group and a carboxylate group (COO) at the top.</p>                                                                                                      |
| 438 | Chloranholide Q | <i>C. holostegius</i> <sup>124</sup> | NA | NA |  <p>The structure of Chloranholide Q is similar to Chloranholide P but includes a hydroxyl group (HO) and a methyl group on the right side of the molecule. It also has a methyl group and a carboxylate group (COO) at the top.</p>                                                                                                             |

|     |                  |                                      |    |    |                                                                                                                                                                                                                                                                                                                                                                                                                                                     |
|-----|------------------|--------------------------------------|----|----|-----------------------------------------------------------------------------------------------------------------------------------------------------------------------------------------------------------------------------------------------------------------------------------------------------------------------------------------------------------------------------------------------------------------------------------------------------|
| 439 | Chloranholide R  | <i>C. holostegius</i> <sup>124</sup> | NA | NA | 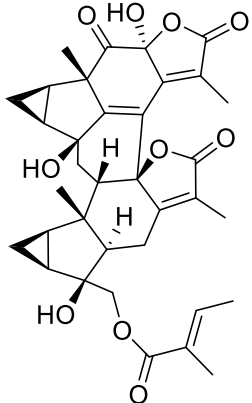 <p>The structure of Chloranholide R is a complex polycyclic molecule. It features a central bicyclic core with a bridgehead oxygen atom. The structure is highly substituted with multiple hydroxyl groups (HO), methyl groups, and a side chain containing an ester group and a terminal vinyl group. Stereochemistry is indicated with wedges and dashes.</p> |
| 440 | Chloranholide S  | <i>C. holostegius</i> <sup>124</sup> | NA | NA |  <p>The structure of Chloranholide S is very similar to Chloranholide R, sharing the same core bicyclic system and substituents. The primary difference lies in the stereochemistry of the hydroxyl groups and the side chain, which is reflected in the placement of wedges and dashes.</p>                                                                     |
| 441 | Chlojaponilide A | <i>C. japonicus</i> <sup>135</sup>   | NA | NA |  <p>The structure of Chlojaponilide A is a complex polycyclic molecule with a different core compared to the chloranholides. It features a bicyclic system with a bridgehead oxygen and is heavily substituted with hydroxyl groups (HO), an acetoxy group (AcO), and a methyl group. Stereochemistry is indicated with wedges and dashes.</p>                  |

|     |                  |                                    |    |    |                                                                                                                                                                                                                                                                                                                                                                                                                                                                                                                                 |
|-----|------------------|------------------------------------|----|----|---------------------------------------------------------------------------------------------------------------------------------------------------------------------------------------------------------------------------------------------------------------------------------------------------------------------------------------------------------------------------------------------------------------------------------------------------------------------------------------------------------------------------------|
| 442 | Chlojaponilide B | <i>C. japonicus</i> <sup>135</sup> | NA | NA | 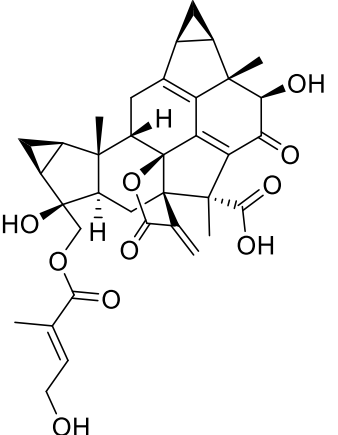 <p>The structure of Chlojaponilide B is a complex polycyclic molecule. It features a central bicyclic core with a bridgehead oxygen atom. The structure is highly substituted with multiple hydroxyl groups (OH), a methyl group, and a side chain containing a double bond and a terminal hydroxyl group. The stereochemistry is indicated with wedged and dashed bonds.</p>                                                               |
| 443 | Chlojaponilide C | <i>C. japonicus</i> <sup>135</sup> | NA | NA |  <p>The structure of Chlojaponilide C is a complex polycyclic molecule, similar to Chlojaponilide B but with a different side chain. It features a central bicyclic core with a bridgehead oxygen atom. The structure is highly substituted with multiple hydroxyl groups (OH), a methyl group, and a side chain containing a double bond and a terminal hydroxyl group. The stereochemistry is indicated with wedged and dashed bonds.</p>  |
| 444 | Chlojaponilide D | <i>C. japonicus</i> <sup>135</sup> | NA | NA |  <p>The structure of Chlojaponilide D is a complex polycyclic molecule, similar to Chlojaponilide C but with a different side chain. It features a central bicyclic core with a bridgehead oxygen atom. The structure is highly substituted with multiple hydroxyl groups (OH), a methyl group, and a side chain containing a double bond and a terminal hydroxyl group. The stereochemistry is indicated with wedged and dashed bonds.</p> |

|     |                  |                                    |    |    |                                                                                      |
|-----|------------------|------------------------------------|----|----|--------------------------------------------------------------------------------------|
| 445 | Chlojaponilide E | <i>C. japonicus</i> <sup>135</sup> | NA | NA | 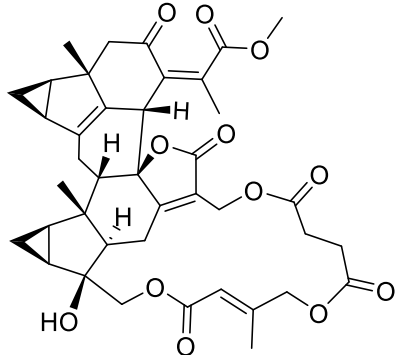  |
| 446 | Chlojaponilide F | <i>C. japonicus</i> <sup>135</sup> | NA | NA |   |
| 447 | Chlojaponilide G | <i>C. japonicus</i> <sup>135</sup> | NA | NA |  |

|     |                  |                                    |    |    |                                                                                                                                                                                                                                                                                                                                                                                                               |
|-----|------------------|------------------------------------|----|----|---------------------------------------------------------------------------------------------------------------------------------------------------------------------------------------------------------------------------------------------------------------------------------------------------------------------------------------------------------------------------------------------------------------|
| 448 | Chlojaponilide H | <i>C. japonicus</i> <sup>135</sup> | NA | NA | 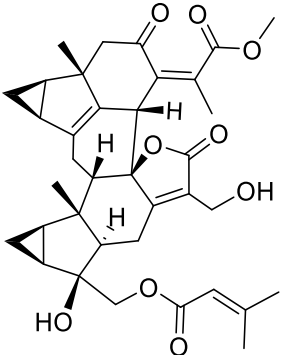 <p>The structure of Chlojaponilide H is a complex polycyclic molecule. It features a central core with multiple fused rings, including a cyclopropane ring. Substituents include a methyl ester group (-COOCH<sub>3</sub>), a hydroxyl group (-OH), and a propenyl ester group (-COOCH<sub>2</sub>CH=CH<sub>2</sub>).</p> |
| 449 | Chlojaponilide I | <i>C. japonicus</i> <sup>135</sup> | NA | NA |  <p>The structure of Chlojaponilide I is similar to Chlojaponilide H but lacks the propenyl ester group. It features a methyl ester group (-COOCH<sub>3</sub>) and a hydroxyl group (-OH) on the side chain.</p>                                                                                                           |
| 450 | Chlojaponilide J | <i>C. japonicus</i> <sup>135</sup> | NA | NA |  <p>The structure of Chlojaponilide J is similar to Chlojaponilide I but includes an additional hydroxyl group (-OH) on the polycyclic core.</p>                                                                                                                                                                          |

|     |                  |                                                       |    |    |                                                                                      |
|-----|------------------|-------------------------------------------------------|----|----|--------------------------------------------------------------------------------------|
| 451 | Chlojaponilide K | <i>C. japonicus</i> <sup>135</sup>                    | NA | NA | 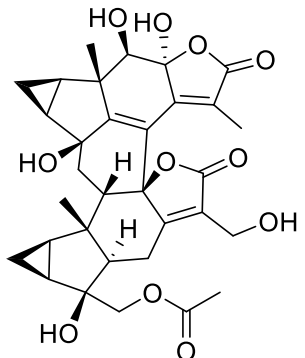  |
| 452 | Chlojaponilide L | <i>C. japonicus</i> <sup>135</sup>                    | NA | NA |   |
| 453 | Chlorahupetol A  | <i>C. henryi</i> var. <i>hupehensis</i> <sup>83</sup> | NA | NA |  |

|     |                 |                                                       |    |    |                                                                                                                                                                                                                                                                                                                                                                                                                                                                                                                                                                                                                   |
|-----|-----------------|-------------------------------------------------------|----|----|-------------------------------------------------------------------------------------------------------------------------------------------------------------------------------------------------------------------------------------------------------------------------------------------------------------------------------------------------------------------------------------------------------------------------------------------------------------------------------------------------------------------------------------------------------------------------------------------------------------------|
| 454 | Chlorahupetol B | <i>C. henryi</i> var. <i>hupehensis</i> <sup>83</sup> | NA | NA | 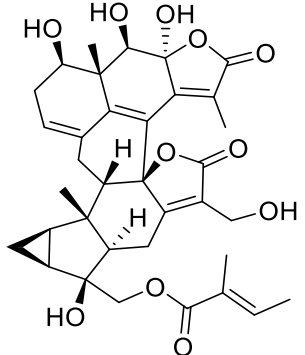 <p>The structure of Chlorahupetol B is a complex polycyclic molecule. It features a central core with multiple fused rings, including a cyclopropane ring. The molecule is heavily substituted with hydroxyl groups (HO) and contains several ester and ether linkages. A prominent feature is a side chain with a terminal vinyl group and a hydroxyl group, connected via an ester linkage.</p>                                                                                                                             |
| 455 | Chlorahupetol C | <i>C. henryi</i> var. <i>hupehensis</i> <sup>83</sup> | NA | NA |  <p>The structure of Chlorahupetol C is a complex polycyclic molecule, similar to Chlorahupetol B. It features a central core with multiple fused rings, including a cyclopropane ring. The molecule is heavily substituted with hydroxyl groups (HO) and contains several ester and ether linkages. A prominent feature is a side chain with a terminal vinyl group and a hydroxyl group, connected via an ester linkage. Additionally, it has a methyl ester group (COOMe) and a long chain with multiple oxygen atoms.</p>  |
| 456 | Chlorahupetol D | <i>C. henryi</i> var. <i>hupehensis</i> <sup>83</sup> | NA | NA |  <p>The structure of Chlorahupetol D is a complex polycyclic molecule, similar to Chlorahupetol B. It features a central core with multiple fused rings, including a cyclopropane ring. The molecule is heavily substituted with hydroxyl groups (HO) and contains several ester and ether linkages. A prominent feature is a side chain with a terminal vinyl group and a hydroxyl group, connected via an ester linkage. Additionally, it has a methyl ester group (COOMe) and a long chain with multiple oxygen atoms.</p> |



|     |                 |                                                       |                                                              |    |                                                                                      |
|-----|-----------------|-------------------------------------------------------|--------------------------------------------------------------|----|--------------------------------------------------------------------------------------|
| 457 | Chlorahupetol E | <i>C. henryi</i> var. <i>hupehensis</i> <sup>83</sup> | NA                                                           | NA | 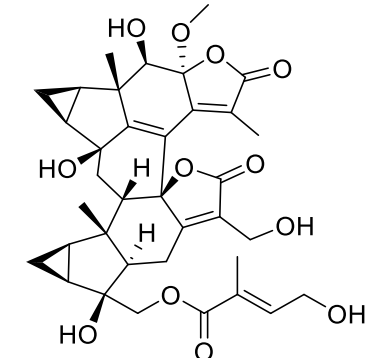  |
| 458 | Chlorahupetol F | <i>C. henryi</i> var. <i>hupehensis</i> <sup>83</sup> | NA                                                           | NA |   |
| 459 | Fortunilide M   | <i>C. fortunei</i> <sup>157</sup>                     | Anti-inflammatory effect<br>IC <sub>50</sub> 13.43 ± 0.34 μM | NA |  |

|     |                 |                                   |                                                              |    |                                                                                      |
|-----|-----------------|-----------------------------------|--------------------------------------------------------------|----|--------------------------------------------------------------------------------------|
| 460 | Fortunilide N   | <i>C. fortunei</i> <sup>157</sup> | Anti-inflammatory effect<br>IC <sub>50</sub> 12.26 ± 2.43 μM | NA | 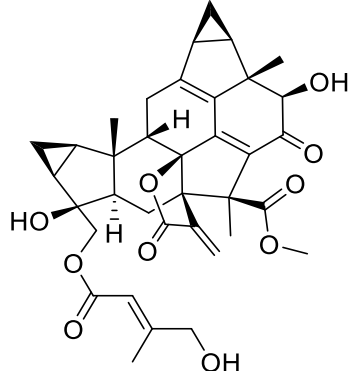  |
| 461 | Fortunilide O   | <i>C. fortunei</i> <sup>157</sup> | Anti-inflammatory effect<br>IC <sub>50</sub> 10.65 ± 1.34 μM | NA |   |
| 462 | Sarglaromatic A | <i>S. glabra</i> <sup>158</sup>   | Anti-nonalcoholic<br>steatohepatitis effect <sup>158</sup>   | NA |  |

|     |                 |                                 |                                                         |    |                                                                                      |
|-----|-----------------|---------------------------------|---------------------------------------------------------|----|--------------------------------------------------------------------------------------|
| 463 | Sarglaromatic B | <i>S. glabra</i> <sup>158</sup> | Anti-nonalcoholic steatohepatitis effect <sup>158</sup> | NA | 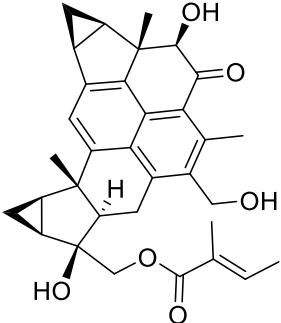  |
| 464 | Sarglaromatic C | <i>S. glabra</i> <sup>158</sup> | NA                                                      | NA |   |
| 465 | Sarglaromatic D | <i>S. glabra</i> <sup>158</sup> | NA                                                      | NA |  |

|     |                  |                                                        |                                                                                                                                         |    |                                                                                      |
|-----|------------------|--------------------------------------------------------|-----------------------------------------------------------------------------------------------------------------------------------------|----|--------------------------------------------------------------------------------------|
| 466 | Sarglaromatic E  | <i>S. glabra</i> <sup>158</sup>                        | NA                                                                                                                                      | NA | 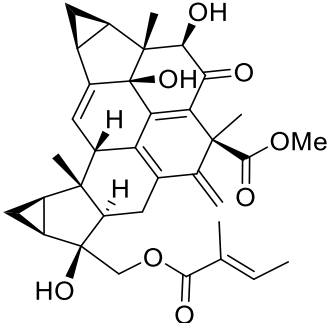  |
| 467 | Chlorahupetone G | <i>C. henryi</i> var. <i>hupehensis</i> <sup>159</sup> | Antitumor effect <sup>159</sup><br>A549 IC <sub>50</sub> 0.43 μM<br>U87 IC <sub>50</sub> 3.45 μM<br>SMMC-7721 IC <sub>50</sub> 8.71 μM  | NA |   |
| 468 | Chlorahupetone H | <i>C. henryi</i> var. <i>hupehensis</i> <sup>159</sup> | Antitumor effect <sup>159</sup><br>A549 IC <sub>50</sub> 0.94 μM<br>U87 IC <sub>50</sub> 7.96 μM<br>SMMC-7721 IC <sub>50</sub> 13.37 μM | NA |  |

|     |                  |                                                        |                                                                                                                                                         |                                                                                                                                                                                                   |                                                                                       |
|-----|------------------|--------------------------------------------------------|---------------------------------------------------------------------------------------------------------------------------------------------------------|---------------------------------------------------------------------------------------------------------------------------------------------------------------------------------------------------|---------------------------------------------------------------------------------------|
| 469 | Chlorahupetone I | <i>C. henryi</i> var. <i>hupehensis</i> <sup>159</sup> | Antitumor effect <sup>159</sup><br>A549 IC <sub>50</sub> 3.15 $\mu$ M<br>U87 IC <sub>50</sub> 16.23 $\mu$ M<br>SMMC-7721 IC <sub>50</sub> 18.54 $\mu$ M | NA                                                                                                                                                                                                | 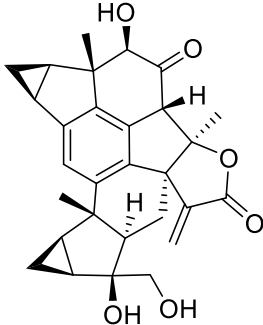   |
| 470 | Chlotrichene A   | <i>C. holostegius</i> <sup>160</sup>                   | Synergetic cytotoxicity with doxorubicin on U2 OS cells <sup>160</sup><br>Combined index (50%) 1.12 $\pm$ 0.07                                          | NA                                                                                                                                                                                                |    |
| 471 | Chlotrichene B   | <i>C. holostegius</i> <sup>160</sup>                   | Synergetic cytotoxicity with doxorubicin on U2 OS cells <sup>160</sup><br>Combined index (50%) 0.94 $\pm$ 0.03                                          | Synthesized from <b>R62</b> that is accessible from (+)-verbenone ( <b>R20</b> ), <sup>140</sup> [4 + 2]-dimerization of key triene <b>R62</b> under simulated physiological condition, Scheme 12 |   |
| 472 | Chloraserrtone A | <i>C. serratus</i> <sup>161</sup>                      | NA                                                                                                                                                      | NA                                                                                                                                                                                                |  |

|                                                     |                                                 |                                   |                                                                             |                                                                                                                                                                                                                     |                                                                                      |
|-----------------------------------------------------|-------------------------------------------------|-----------------------------------|-----------------------------------------------------------------------------|---------------------------------------------------------------------------------------------------------------------------------------------------------------------------------------------------------------------|--------------------------------------------------------------------------------------|
| 473                                                 | Spirolindemer A                                 | <i>C. henryi</i> <sup>162</sup>   | Anti-inflammatory effect <sup>162</sup><br>IC <sub>50</sub> 12.94 ± 0.30 μM | NA                                                                                                                                                                                                                  | 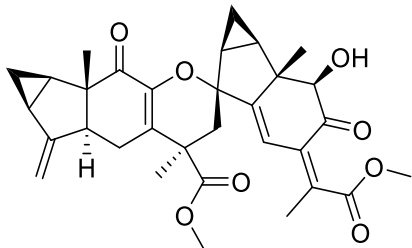  |
| <b>III-a2. [6 + 6]-Cycloaddition type (474–482)</b> |                                                 |                                   |                                                                             |                                                                                                                                                                                                                     |                                                                                      |
| 474                                                 | Cycloshizukaol A                                | <i>C. serratus</i> <sup>163</sup> | Anti-atherosclerotic effect <sup>134</sup>                                  | Synthesized from <b>R62</b> that is accessible from (+)-verbenone ( <b>R20</b> ), <sup>140</sup> [4 + 2]-dimerization of key triene <b>R62</b> under simulated physiological condition and rearrangement, Scheme 12 |   |
| 475                                                 | 9- <i>O</i> -β-D-Glucopyranosylcycloshizukaol A | <i>C. fortunei</i> <sup>35</sup>  | NA                                                                          | NA                                                                                                                                                                                                                  |  |

|     |                                                                                              |                                    |    |    |                                                                                      |
|-----|----------------------------------------------------------------------------------------------|------------------------------------|----|----|--------------------------------------------------------------------------------------|
| 476 | <p>Japonicone A<br/>The name is repeated for three different compounds<sup>164-166</sup></p> | <i>C. japonicus</i> <sup>166</sup> | NA | NA | 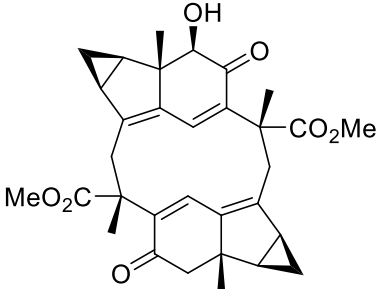  |
| 477 | <p>Japonicone B<br/>The name is repeated for three different compounds<sup>164-166</sup></p> | <i>C. fortunei</i> <sup>166</sup>  | NA | NA |   |
| 478 | <p>Japonicone C<br/>The name is repeated for three different compounds<sup>164-166</sup></p> | <i>C. japonicus</i> <sup>166</sup> | NA | NA |  |

|     |                  |                                                        |                                                         |                                                                                                                        |                                                                                      |
|-----|------------------|--------------------------------------------------------|---------------------------------------------------------|------------------------------------------------------------------------------------------------------------------------|--------------------------------------------------------------------------------------|
| 479 | Chlospicene A    | <i>C. henryi</i> <sup>167</sup>                        | Anti-nonalcoholic steatohepatitis effect <sup>167</sup> | NA                                                                                                                     | 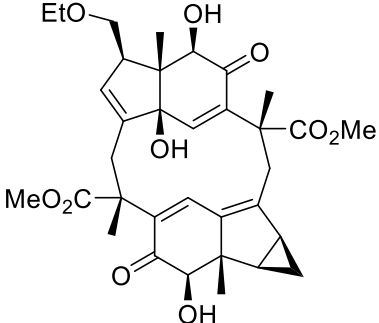  |
| 480 | Chlospicene B    | <i>C. henryi</i> <sup>167</sup>                        | Anti-nonalcoholic steatohepatitis effect <sup>167</sup> | NA                                                                                                                     |   |
| 481 | Chlorahupetone F | <i>C. henryi</i> var. <i>hupehensis</i> <sup>159</sup> | NA                                                      | Synthesized from cycloshizukaol A (474), <sup>140</sup> double vinylcyclopropane-cyclopentene rearrangement, Scheme 12 |  |



|                                                     |                  |                                      |                                                                          |    |                                                                                      |
|-----------------------------------------------------|------------------|--------------------------------------|--------------------------------------------------------------------------|----|--------------------------------------------------------------------------------------|
| 482                                                 | Chlojaponilide M | <i>C. japonicus</i> <sup>135</sup>   | NA                                                                       | NA | 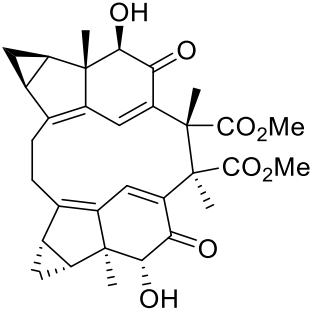  |
| <b>III-a3. [2 + 2]-Cycloaddition type (483–486)</b> |                  |                                      |                                                                          |    |                                                                                      |
| 483                                                 | Chololactone H   | <i>C. holostegius</i> <sup>149</sup> | Anti-inflammatory effect <sup>149</sup><br>IC <sub>50</sub> 4.4 ± 1.8 μM | NA |   |
| 484                                                 | Sarglactone N    | <i>S. glabra</i> <sup>153</sup>      | NA                                                                       | NA |  |

|                                                                 |                                                                           |                                                        |                                                                                                                                       |                                                                                                 |                                                                                       |
|-----------------------------------------------------------------|---------------------------------------------------------------------------|--------------------------------------------------------|---------------------------------------------------------------------------------------------------------------------------------------|-------------------------------------------------------------------------------------------------|---------------------------------------------------------------------------------------|
| 485                                                             | Sarglactone O                                                             | <i>S. glabra</i> <sup>153</sup>                        | NA                                                                                                                                    | NA                                                                                              | 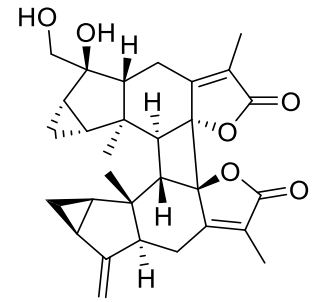   |
| 486                                                             | Chloranthalactone A photodimer<br>The structure was revised <sup>24</sup> | <i>C. japonicus</i> <sup>168</sup>                     | NA                                                                                                                                    | Synthesized from chloranthalactone A (19), <sup>11,24</sup> [2 + 2] photodimerization, Scheme 5 |    |
| <b>III-a4. [6 + 6] and [2 + 2]-Cycloaddition type (487–488)</b> |                                                                           |                                                        |                                                                                                                                       |                                                                                                 |                                                                                       |
| 487                                                             | Chlorahupetone D                                                          | <i>C. henryi</i> var. <i>hupehensis</i> <sup>159</sup> | Antitumor effect <sup>159</sup><br>A549 IC <sub>50</sub> 32.27 μM<br>U87 IC <sub>50</sub> >50 μM<br>SMMC-7721 IC <sub>50</sub> >50 μM | NA                                                                                              |   |
| 488                                                             | Chlorahupetone E                                                          | <i>C. henryi</i> var. <i>hupehensis</i> <sup>159</sup> | Antitumor effect <sup>159</sup><br>A549 IC <sub>50</sub> 15.18 μM<br>U87 IC <sub>50</sub> 28.85 μM<br>SMMC-7721 42.21 μM              | NA                                                                                              |  |

III-a5. Linear-type (489–495)

| III-a5. Linear-type (489–495) |                   |                                    |                                                                      |                                                                                                                                                                                                                                                                                                                                                                                                                                                                                                              |                                                                                      |
|-------------------------------|-------------------|------------------------------------|----------------------------------------------------------------------|--------------------------------------------------------------------------------------------------------------------------------------------------------------------------------------------------------------------------------------------------------------------------------------------------------------------------------------------------------------------------------------------------------------------------------------------------------------------------------------------------------------|--------------------------------------------------------------------------------------|
| 489                           | Shizukaol J       | <i>C. japonicus</i> <sup>169</sup> | NA                                                                   | <p>a. Synthesized from key intermediate <b>R53</b> that is accessible from propionyl chloride (<b>R48</b>) and methacrolein (<b>R49</b>),<sup>170</sup> Corey–Chaykovsky cyclopropanation, olefin metathesis, aldol condensation, and Pd-catalyzed Stille coupling, Scheme 11</p> <p>b. Synthesized from <b>R62</b> that is accessible from (+)-verbenone (<b>R20</b>),<sup>140</sup> [4 + 2]-dimerization of key triene <b>R62</b> under simulated physiological condition and rearrangement, Scheme 12</p> | 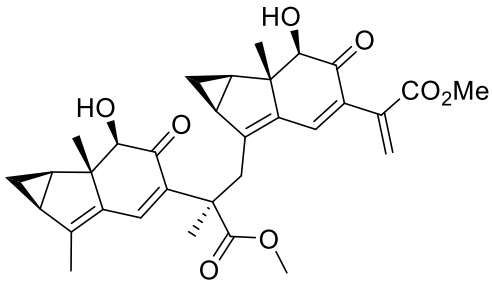  |
| 490                           | Chlojapolactone A | <i>C. japonicus</i> <sup>171</sup> | Anti-inflammatory effect <sup>171</sup><br>IC <sub>50</sub> 14.87 μM | NA                                                                                                                                                                                                                                                                                                                                                                                                                                                                                                           |  |

|     |               |                                |                                                                                                                                                                                        |    |                                                                                      |
|-----|---------------|--------------------------------|----------------------------------------------------------------------------------------------------------------------------------------------------------------------------------------|----|--------------------------------------------------------------------------------------|
| 491 | Sarglactone D | <i>S. glabra</i> <sup>53</sup> | Multidrug resistance reversal effect <sup>53</sup><br>Reversal fold 22.3<br>Synergetic cytotoxicity with doxorubicin on U2 OS cells <sup>53</sup><br>Combined index (50%) 0.68 ± 0.06  | NA | 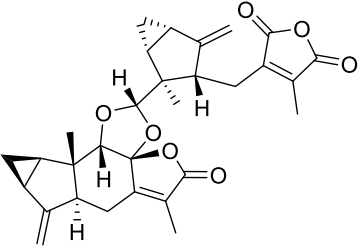  |
| 492 | Sarglactone E | <i>S. glabra</i> <sup>53</sup> | Multidrug resistance reversal effect <sup>53</sup><br>Reversal fold 11.8<br>Synergetic cytotoxicity with doxorubicin on U2 OS cells <sup>53</sup><br>Combined index (50%) 0.97 ± 0.06  | NA |   |
| 493 | Sarglactone F | <i>S. glabra</i> <sup>53</sup> | Multidrug resistance reversal effect <sup>53</sup><br>Reversal fold 45.2<br>Synergetic cytotoxicity with doxorubicin on U2 OS cells <sup>53</sup><br>Combined index (50%) 0.80 ± 0.06  | NA |   |
| 494 | Sarglactone G | <i>S. glabra</i> <sup>53</sup> | Multidrug resistance reversal effect <sup>53</sup><br>Reversal fold 129.2<br>Synergetic cytotoxicity with doxorubicin on U2 OS cells <sup>53</sup><br>Combined index (50%) 0.65 ± 0.08 | NA |  |

|                                                                   |                  |                                                        |                                                                                                                                                                                       |    |                                                                                       |
|-------------------------------------------------------------------|------------------|--------------------------------------------------------|---------------------------------------------------------------------------------------------------------------------------------------------------------------------------------------|----|---------------------------------------------------------------------------------------|
| 495                                                               | Sarglactone H    | <i>S. glabra</i> <sup>53</sup>                         | Multidrug resistance reversal effect <sup>53</sup><br>Reversal fold 19.3<br>Synergetic cytotoxicity with doxorubicin on U2 OS cells <sup>53</sup><br>Combined index (50%) 0.65 ± 0.05 | NA | 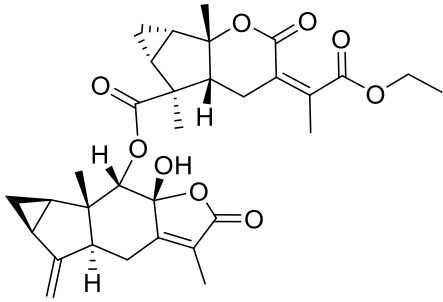   |
| <b>III-b. Lindenane hetero dimers (496–438)</b>                   |                  |                                                        |                                                                                                                                                                                       |    |                                                                                       |
| <b>III-b1. Lindenane-guaiane sesquiterpenoid dimers (496–498)</b> |                  |                                                        |                                                                                                                                                                                       |    |                                                                                       |
| 496                                                               | Chlorahupetone A | <i>C. henryi</i> var. <i>hupehensis</i> <sup>159</sup> | Antitumor effect <sup>159</sup><br>A549 IC <sub>50</sub> 12.91 μM<br>U87 IC <sub>50</sub> 9.82 μM<br>SMMC-7721 IC <sub>50</sub> 26.31 μM                                              | NA |    |
| 497                                                               | Chlorahupetone B | <i>C. henryi</i> var. <i>hupehensis</i> <sup>159</sup> | Antitumor effect <sup>159</sup><br>A549 IC <sub>50</sub> 18.69 μM<br>U87 IC <sub>50</sub> 26.36 μM<br>SMMC-7721 IC <sub>50</sub> >50 μM                                               | NA |   |
| 498                                                               | Chlorahupetone C | <i>C. henryi</i> var. <i>hupehensis</i> <sup>159</sup> | Antitumor effect <sup>159</sup><br>A549 IC <sub>50</sub> 38.76 μM<br>U87 IC <sub>50</sub> >50 μM<br>SMMC-7721 IC <sub>50</sub> >50 μM                                                 | NA |  |

| <b>III-b2. Lindenane-acrane sesquiterpenoid dimers (499–500)</b>   |                  |                                   |                                                             |    |                                                                                      |
|--------------------------------------------------------------------|------------------|-----------------------------------|-------------------------------------------------------------|----|--------------------------------------------------------------------------------------|
| <b>499</b>                                                         | Chlorfortunone A | <i>C. fortunei</i> <sup>172</sup> | Transforming growth factor inhibitory effect <sup>172</sup> | NA | 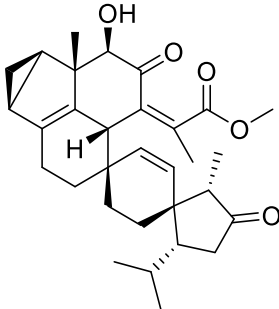  |
| <b>500</b>                                                         | Chlorfortunone B | <i>C. fortunei</i> <sup>172</sup> | NA                                                          | NA |   |
| <b>III-b3. Lindenane-eudesmane sesquiterpenoid dimer (501)</b>     |                  |                                   |                                                             |    |                                                                                      |
| <b>501</b>                                                         | Horienoid B      | <i>H. orientale</i> <sup>18</sup> | NA                                                          | NA |  |
| <b>III-b4. Lindenane-aromadendrane sesquiterpenoid dimer (502)</b> |                  |                                   |                                                             |    |                                                                                      |

|                                                            |                      |                                                       |                                                                      |    |                                                                                      |
|------------------------------------------------------------|----------------------|-------------------------------------------------------|----------------------------------------------------------------------|----|--------------------------------------------------------------------------------------|
| 502                                                        | Hedyorienoid A       | <i>H. orientale</i> <sup>173</sup>                    | NA                                                                   | NA | 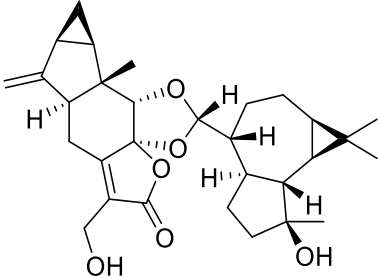  |
| <b>III-c. Dimeric eudesmane sesquiterpenoids (503–512)</b> |                      |                                                       |                                                                      |    |                                                                                      |
| 503                                                        | (+)-Chlorahupetene A | <i>C. henryi</i> Var. <i>hupehensi</i> <sup>174</sup> | Anti-inflammatory effect <sup>174</sup><br>IC <sub>50</sub> 12.91 μM | NA |   |
| 504                                                        | (-)-Chlorahupetene A | <i>C. henryi</i> Var. <i>hupehensi</i> <sup>174</sup> | Anti-inflammatory effect <sup>174</sup><br>IC <sub>50</sub> 9.62 μM  | NA |  |

|     |                      |                                                       |                                                                           |    |                                                                                      |
|-----|----------------------|-------------------------------------------------------|---------------------------------------------------------------------------|----|--------------------------------------------------------------------------------------|
| 505 | (+)-Chlorahupetene B | <i>C. henryi</i> Var. <i>hupehensi</i> <sup>174</sup> | Anti-inflammatory effect <sup>174</sup><br>IC <sub>50</sub> 12.31 $\mu$ M | NA | 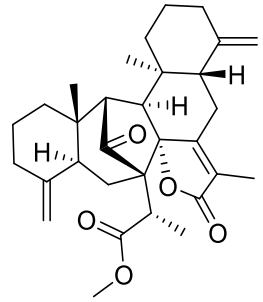  |
| 506 | (-)-Chlorahupetene B | <i>C. henryi</i> Var. <i>hupehensi</i> <sup>174</sup> | Anti-inflammatory effect <sup>174</sup><br>IC <sub>50</sub> 11.89 $\mu$ M | NA |   |
| 507 | (+)-Chlorahupetene C | <i>C. henryi</i> Var. <i>hupehensi</i> <sup>174</sup> | Anti-inflammatory effect <sup>174</sup><br>IC <sub>50</sub> 10.07 $\mu$ M | NA |   |
| 508 | (-)-Chlorahupetene C | <i>C. henryi</i> Var. <i>hupehensi</i> <sup>174</sup> | Anti-inflammatory effect <sup>174</sup><br>IC <sub>50</sub> 10.87 $\mu$ M | NA |  |



|                                                                  |                                                                                   |                                                       |                                                                          |    |                                                                                      |
|------------------------------------------------------------------|-----------------------------------------------------------------------------------|-------------------------------------------------------|--------------------------------------------------------------------------|----|--------------------------------------------------------------------------------------|
| 509                                                              | (+)-Chlorahupetene D                                                              | <i>C. henryi</i> Var. <i>hupehensi</i> <sup>174</sup> | NA                                                                       | NA | 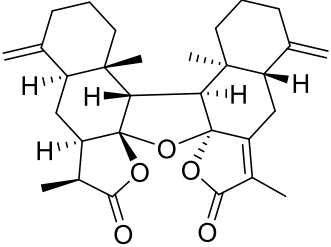  |
| 510                                                              | (-)-Chlorahupetene D                                                              | <i>C. henryi</i> Var. <i>hupehensi</i> <sup>174</sup> | NA                                                                       | NA |   |
| 511                                                              | Chlorahupetene E                                                                  | <i>C. henryi</i> var. <i>hupehensis</i> <sup>83</sup> | Anti-inflammatory effect <sup>83</sup>                                   | NA |   |
| 512                                                              | Sarglanoid C<br>The name is repeated for two different compounds <sup>60,66</sup> | <i>S. glabra</i> <sup>60</sup>                        | Anti-inflammatory effect <sup>60</sup><br>IC <sub>50</sub> 25.7 ± 0.2 μM | NA |  |
| <b>III-d. Eudesmane-eremophilane sesquiterpenoid dimer (513)</b> |                                                                                   |                                                       |                                                                          |    |                                                                                      |

|                                                             |                |                                    |                                                                                            |    |                                                                                      |
|-------------------------------------------------------------|----------------|------------------------------------|--------------------------------------------------------------------------------------------|----|--------------------------------------------------------------------------------------|
| 513                                                         | Sarglanoid A   | <i>S. glabra</i> <sup>60</sup>     | NA                                                                                         | NA | 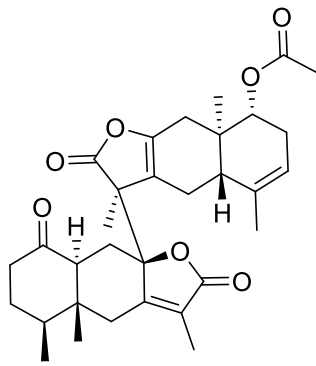  |
| <b>III-e. Dimeric eremophilane sesquiterpenoid (514)</b>    |                |                                    |                                                                                            |    |                                                                                      |
| 514                                                         | Sarglanoid B   | <i>S. glabra</i> <sup>60</sup>     | NA                                                                                         | NA |   |
| <b>III-f. Dimeric guaiane sesquiterpenoid (515)</b>         |                |                                    |                                                                                            |    |                                                                                      |
| 515                                                         | Hedyorienoid B | <i>H. orientale</i> <sup>173</sup> | NF- $\kappa$ B inhibitory effect <sup>18</sup><br>IC <sub>50</sub> 5.34 $\pm$ 2.21 $\mu$ M | NA |  |
| <b>III-g. Eudesmane-guaiane sesquiterpenoid dimer (516)</b> |                |                                    |                                                                                            |    |                                                                                      |

|                                                                    |                |                                    |                                                                                                                                                    |                                                                                                                                                                                             |                                                                                       |
|--------------------------------------------------------------------|----------------|------------------------------------|----------------------------------------------------------------------------------------------------------------------------------------------------|---------------------------------------------------------------------------------------------------------------------------------------------------------------------------------------------|---------------------------------------------------------------------------------------|
| 516                                                                | Horienoid A    | <i>H. orientale</i> <sup>18</sup>  | NA                                                                                                                                                 | NA                                                                                                                                                                                          | 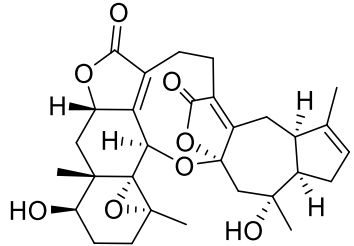   |
| <b>III-h. Eudesmane-elemanane sesquiterpenoid dimers (517–518)</b> |                |                                    |                                                                                                                                                    |                                                                                                                                                                                             |                                                                                       |
| 517                                                                | Serratustone A | <i>C. serratus</i> <sup>175</sup>  | NA                                                                                                                                                 | NA                                                                                                                                                                                          |    |
| 518                                                                | Serratustone B | <i>C. serratus</i> <sup>175</sup>  | NA                                                                                                                                                 | NA                                                                                                                                                                                          |    |
| <b>III-i. Trimeric sesquiterpenoids (519–531)</b>                  |                |                                    |                                                                                                                                                    |                                                                                                                                                                                             |                                                                                       |
| 519                                                                | Trishizukaol A | <i>C. japonicus</i> <sup>169</sup> | Anti-inflammatory effect <sup>176</sup><br>IC <sub>50</sub> 10.40 ± 0.12 μM<br>Antimalarial effect <sup>177</sup><br>IC <sub>50</sub> 1.25–2.50 μM | a. Synthesized from trichloranoid C (525), <sup>170</sup> hydrolysis, Scheme 11<br>b. Synthesized from R62 and shizukaol J (489), <sup>140</sup> biomimetic [4 + 2] dimerization, Scheme 12 |  |

|     |                 |                                   |                                                                                                                                                                                                                       |    |                                                                                      |
|-----|-----------------|-----------------------------------|-----------------------------------------------------------------------------------------------------------------------------------------------------------------------------------------------------------------------|----|--------------------------------------------------------------------------------------|
| 520 | Sarglactone A   | <i>S. glabra</i> <sup>53</sup>    | <p>a. Multidrug resistance reversal effect<sup>53</sup><br/>Reversal fold 55.8</p> <p>b. Synergetic cytotoxicity with doxorubicin on U2 OS cells<sup>53</sup><br/>Combined index (50%) <math>0.64 \pm 0.08</math></p> | NA | 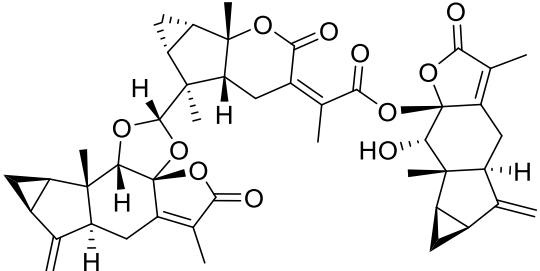  |
| 521 | Sarglactone B   | <i>S. glabra</i> <sup>53</sup>    | <p>Synergetic cytotoxicity with doxorubicin on U2 OS cells<sup>53</sup><br/>Combined index (50%) <math>0.92 \pm 0.06</math></p>                                                                                       | NA |   |
| 522 | Sarglactone C   | <i>S. glabra</i> <sup>53</sup>    | <p>Synergetic cytotoxicity with doxorubicin on U2 OS cells<sup>53</sup><br/>Combined index (50%) <math>0.67 \pm 0.07</math></p>                                                                                       | NA |   |
| 523 | Trichloranoid A | <i>C. spicatus</i> <sup>177</sup> | <p>Anti-inflammatory effect<sup>176</sup><br/><math>IC_{50} 2.90 \pm 2.41 \mu M</math></p> <p>Antimalarial effect<sup>177</sup><br/><math>EC_{50} 2.50-5.00 \mu M</math></p>                                          | NA |  |

|     |                 |                                   |                                                                             |                                                                                                                                                                                                                                                                                                                             |                                                                                      |
|-----|-----------------|-----------------------------------|-----------------------------------------------------------------------------|-----------------------------------------------------------------------------------------------------------------------------------------------------------------------------------------------------------------------------------------------------------------------------------------------------------------------------|--------------------------------------------------------------------------------------|
| 524 | Trichloranoid B | <i>C. spicatus</i> <sup>177</sup> | Anti-inflammatory effect <sup>176</sup><br>IC <sub>50</sub> 19.95 ± 0.45 μM | NA                                                                                                                                                                                                                                                                                                                          | 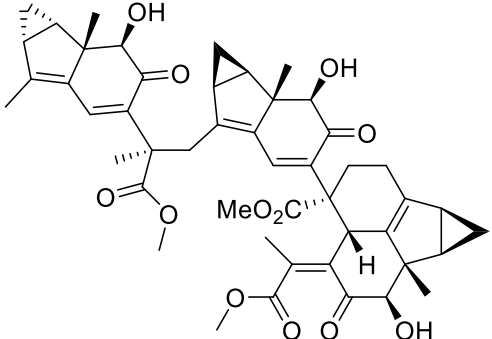  |
| 525 | Trichloranoid C | <i>C. spicatus</i> <sup>177</sup> | NA                                                                          | Synthesized from key intermediate <b>R53</b> that is accessible from propionyl chloride ( <b>R48</b> ) and methacrolein ( <b>R49</b> ), <sup>170</sup> Corey–Chaykovsky cyclopropanation, olefin metathesis, aldol condensation, Pd-catalyzed Stille coupling, and acid-promoted diene formation/[4 + 2] cascade, Scheme 11 |   |
| 526 | Trichloranoid D | <i>C. spicatus</i> <sup>177</sup> | Antimalarial effect <sup>177</sup><br>EC <sub>50</sub> 10.0–15.0 μM         | NA                                                                                                                                                                                                                                                                                                                          |  |

|     |                |                                   |                                                                             |    |                                                                                                                                                                                                                                                                                                                                                                                                                                                                                           |
|-----|----------------|-----------------------------------|-----------------------------------------------------------------------------|----|-------------------------------------------------------------------------------------------------------------------------------------------------------------------------------------------------------------------------------------------------------------------------------------------------------------------------------------------------------------------------------------------------------------------------------------------------------------------------------------------|
| 527 | Chlofortunin A | <i>C. fortunei</i> <sup>176</sup> | Anti-inflammatory effect <sup>176</sup><br>IC <sub>50</sub> 22.80 ± 0.72 μM | NA | 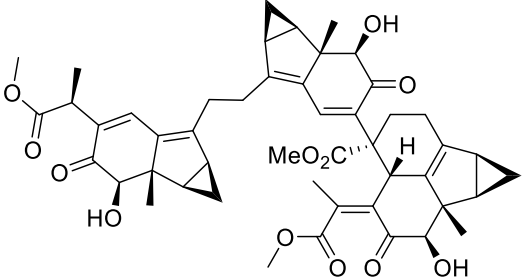 <p>The structure of Chlofortunin A is a complex polycyclic molecule. It features a central bicyclic core with a bridgehead hydrogen atom explicitly shown. Attached to this core are several side chains, including a propyl chain, a chain with a hydroxyl group and a methyl group, and a chain with a methoxycarbonyl group. The molecule also contains multiple carbonyl and hydroxyl groups.</p> |
| 528 | Chlofortunin B | <i>C. fortunei</i> <sup>176</sup> | Anti-inflammatory effect <sup>176</sup><br>IC <sub>50</sub> 10.13 ± 0.12 μM | NA |  <p>The structure of Chlofortunin B is similar to Chlofortunin A but includes an additional fused ring system on the left side, which contains an oxygen atom and a carbonyl group. The rest of the molecule, including the central bicyclic core and various side chains, is identical to Chlofortunin A.</p>                                                                                         |
| 529 | Chlofortunin C | <i>C. fortunei</i> <sup>176</sup> | Anti-inflammatory effect <sup>176</sup><br>IC <sub>50</sub> 9.83 ± 0.01 μM  | NA |  <p>The structure of Chlofortunin C is similar to Chlofortunin B but features a different side chain on the left side, which includes a hydroxyl group and a methyl group. The central bicyclic core and other side chains are consistent with the other two compounds.</p>                                                                                                                           |

|                                                   |                 |                                        |                                                                            |    |                                                                                       |
|---------------------------------------------------|-----------------|----------------------------------------|----------------------------------------------------------------------------|----|---------------------------------------------------------------------------------------|
| 530                                               | Chlofortunin D  | <i>C. fortunei</i> <sup>176</sup>      | Anti-inflammatory effect <sup>176</sup><br>IC <sub>50</sub> 9.59 ± 0.03 μM | NA | 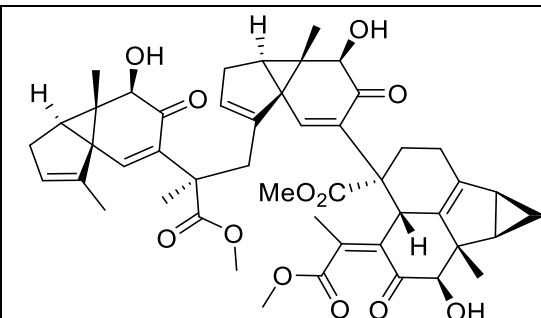   |
| 531                                               | Spirolindemer B | <i>C. henryi</i> <sup>162</sup>        | NA                                                                         | NA |    |
| <b>IV. Diterpenoids (532–620)</b>                 |                 |                                        |                                                                            |    |                                                                                       |
| <b>IV-a. Abietane-type diterpenoids (532–558)</b> |                 |                                        |                                                                            |    |                                                                                       |
| 532                                               | Sessilifol D    | <i>C. sessilifolius</i> <sup>178</sup> | NA                                                                         | NA |   |
| 533                                               | Decandrin B     | <i>C. henryi</i> <sup>179</sup>        | NA                                                                         | NA |  |

|     |                                  |                                        |                                                                            |    |                                                                                       |
|-----|----------------------------------|----------------------------------------|----------------------------------------------------------------------------|----|---------------------------------------------------------------------------------------|
| 534 | 13- <i>O</i> -Methylsessilifol D | <i>C. henryi</i> <sup>179</sup>        | NA                                                                         | NA | 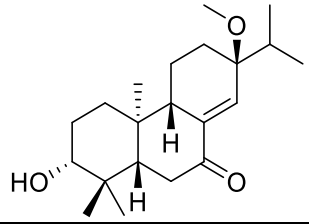   |
| 535 | Sessilifol F                     | <i>C. sessilifolius</i> <sup>178</sup> | Anti-neuroinflammatory effect <sup>178</sup> IC <sub>50</sub> 8.3 μM       | NA |    |
| 536 | Chloranhenryin B                 | <i>C. henryi</i> <sup>179</sup>        | NA                                                                         | NA |    |
| 537 | Sessilifol H                     | <i>C. sessilifolius</i> <sup>178</sup> | Anti-neuroinflammatory effect <sup>178</sup> IC <sub>50</sub> 37.7 μM      | NA |   |
| 538 | Sessilifol I                     | <i>C. sessilifolius</i> <sup>178</sup> | Anti-neuroinflammatory effect <sup>178</sup> IC <sub>50</sub> 7.4 ± 0.8 μM | NA |  |



|     |                                           |                                        |                                                                       |    |                                                                                       |
|-----|-------------------------------------------|----------------------------------------|-----------------------------------------------------------------------|----|---------------------------------------------------------------------------------------|
| 539 | Sessilifol G                              | <i>C. sessilifolius</i> <sup>178</sup> | NA                                                                    | NA | 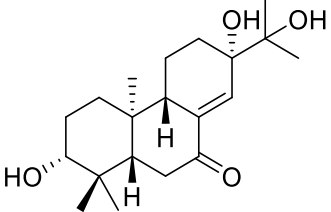   |
| 540 | 15-Hydroxysessilifol F                    | <i>C. henryi</i> <sup>179</sup>        | NA                                                                    | NA |    |
| 541 | 19-Hydroxy- <i>ent</i> -abieta-7,13-diene | <i>C. oldhamii</i> <sup>180</sup>      | NA                                                                    | NA |    |
| 542 | Chlorabietin G                            | <i>C. oldhamii</i> <sup>181</sup>      | Anti-neuroinflammatory effect <sup>181</sup> IC <sub>50</sub> 23.8 μM | NA |   |
| 543 | 3α-Hydroxy- <i>ent</i> -abieta-7,13-diene | <i>C. oldhamii</i> <sup>182</sup>      | NA                                                                    | NA |  |

|     |                  |                                        |                                                                             |    |                                                                                       |
|-----|------------------|----------------------------------------|-----------------------------------------------------------------------------|----|---------------------------------------------------------------------------------------|
| 544 | Chloranhenryin C | <i>C. henryi</i> <sup>179</sup>        | NA                                                                          | NA | 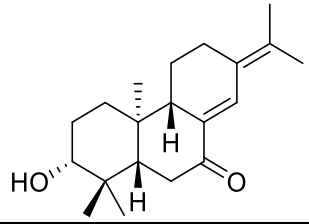   |
| 545 | Chlorabietin H   | <i>C. oldhamii</i> <sup>181</sup>      | NA                                                                          | NA |    |
| 546 | Chlorabietin I   | <i>C. oldhamii</i> <sup>181</sup>      | NA                                                                          | NA |    |
| 547 | Sessilifol J     | <i>C. sessilifolius</i> <sup>178</sup> | Anti-neuroinflammatory effect <sup>178</sup> IC <sub>50</sub> 17.8 ± 1.8 μM | NA |   |
| 548 | Sessilifol M     | <i>C. sessilifolius</i> <sup>178</sup> | Anti-inflammatory effect <sup>178</sup> IC <sub>50</sub> 43.9 ± 3.3 μM      | NA |  |

|     |                                                        |                                        |    |    |                                                                                       |
|-----|--------------------------------------------------------|----------------------------------------|----|----|---------------------------------------------------------------------------------------|
| 549 | Chlorabietin J                                         | <i>C. oldhamii</i> <sup>181</sup>      | NA | NA | 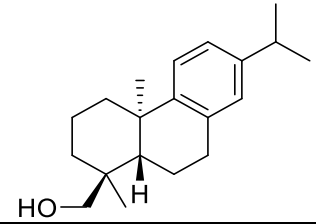   |
| 550 | Chlorabietin K                                         | <i>C. oldhamii</i> <sup>181</sup>      | NA | NA |    |
| 551 | 15-O-Methylsessilifol J                                | <i>C. henryi</i> <sup>179</sup>        | NA | NA |    |
| 552 | 3 $\beta$ ,7 $\alpha$ -Dihydroxi-abieta-8,11,13-triene | <i>C. henryi</i> <sup>179</sup>        | NA | NA |   |
| 553 | Sessilifol K                                           | <i>C. sessilifolius</i> <sup>178</sup> | NA | NA |  |

|                                                             |                                                                                      |                                        |    |    |  |
|-------------------------------------------------------------|--------------------------------------------------------------------------------------|----------------------------------------|----|----|--|
| 554                                                         | Chlorabietin L                                                                       | <i>C. oldhamii</i> <sup>181</sup>      | NA | NA |  |
| 555                                                         | 3 $\beta$ -Hydroxy-abieta-8,11,13-trien-7-one                                        | <i>C. henryi</i> <sup>179</sup>        | NA | NA |  |
| 556                                                         | 3 $\alpha$ -Hydroxy-ent-abieta-8,11,13-trien-7-one                                   | <i>C. oldhamii</i> <sup>182</sup>      | NA | NA |  |
| 557                                                         | (3 <i>R</i> ,5 <i>S</i> ,10 <i>R</i> )-3,15-Dihydroxy-ent-abieta-8,11,13-trien-7-one | <i>C. sessilifolius</i> <sup>183</sup> | NA | NA |  |
| 558                                                         | Sessilifol L                                                                         | <i>C. sessilifolius</i> <sup>178</sup> | NA | NA |  |
| <b>IV-b. 13,14-Secoabietane-type diterpenoids (559–564)</b> |                                                                                      |                                        |    |    |  |

|     |                  |                                        |    |    |  |
|-----|------------------|----------------------------------------|----|----|--|
| 559 | Chloranhenryin E | <i>C. henryi</i> <sup>179</sup>        | NA | NA |  |
| 560 | Chloranhenryin F | <i>C. henryi</i> <sup>179</sup>        | NA | NA |  |
| 561 | Sessilifol N     | <i>C. sessilifolius</i> <sup>178</sup> | NA | NA |  |
| 562 | Chlorabietin A   | <i>C. oldhamii</i> <sup>181</sup>      | NA | NA |  |

|                                                         |                  |                                        |                                                                            |    |  |
|---------------------------------------------------------|------------------|----------------------------------------|----------------------------------------------------------------------------|----|--|
| 563                                                     | Chlorabietin B   | <i>C. oldhamii</i> <sup>181</sup>      | Anti-neuroinflammatory effect <sup>181</sup> IC <sub>50</sub> 22.2 $\mu$ M | NA |  |
| 564                                                     | Chlorabietin C   | <i>C. oldhamii</i> <sup>181</sup>      | Anti-neuroinflammatory effect <sup>181</sup> IC <sub>50</sub> 16.4 $\mu$ M | NA |  |
| <b>IV-c. 14-Norabietane-type diterpenoids (565–566)</b> |                  |                                        |                                                                            |    |  |
| 565                                                     | Sessilifol O     | <i>C. sessilifolius</i> <sup>178</sup> | NA                                                                         | NA |  |
| 566                                                     | Chloranhenryin D | <i>C. henryi</i> <sup>179</sup>        | NA                                                                         | NA |  |
| <b>IV-d. 7,8-Secoabietane-type diterpenoids (567)</b>   |                  |                                        |                                                                            |    |  |

|                                                                 |                                                                                     |                                        |    |    |                                                                                      |
|-----------------------------------------------------------------|-------------------------------------------------------------------------------------|----------------------------------------|----|----|--------------------------------------------------------------------------------------|
| 567                                                             | Sessilifol C                                                                        | <i>C. sessilifolius</i> <sup>178</sup> | NA | NA | 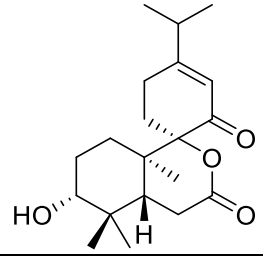  |
| <b>IV-e. 10(9→8)-Abeoabietane-type diterpenoids (568–569)</b>   |                                                                                     |                                        |    |    |                                                                                      |
| 568                                                             | Chlorabietin D                                                                      | <i>C. oldhamii</i> <sup>181</sup>      | NA | NA |   |
| 569                                                             | Chlorabietin E                                                                      | <i>C. oldhamii</i> <sup>181</sup>      | NA | NA |   |
| <b>IV-f. 14(13→12)-Abeoabietane-type diterpenoids (570–571)</b> |                                                                                     |                                        |    |    |                                                                                      |
| 570                                                             | Sessilifol A<br>The name is repeated for two different compounds <sup>178,184</sup> | <i>C. sessilifolius</i> <sup>178</sup> | NA | NA |  |

|                                                  |                                                                                     |                                        |    |    |                                                                                      |
|--------------------------------------------------|-------------------------------------------------------------------------------------|----------------------------------------|----|----|--------------------------------------------------------------------------------------|
| 571                                              | Sessilifol B<br>The name is repeated for two different compounds <sup>178,184</sup> | <i>C. sessilifolius</i> <sup>178</sup> | NA | NA | 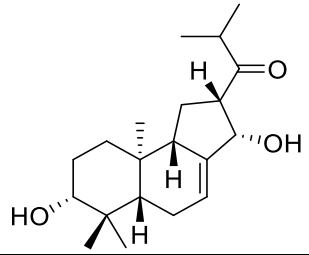  |
| <b>IV-g. Labdane-type diterpenoids (572–595)</b> |                                                                                     |                                        |    |    |                                                                                      |
| 572                                              | 12,15-Epoxy-5 $\alpha$ H,9 $\beta$ H-labda-8(17),13-dien-19-oic acid                | <i>C. henryi</i> <sup>78</sup>         | NA | NA |   |
| 573                                              | Serralabdane B                                                                      | <i>C. serratus</i> <sup>185</sup>      | NA | NA |   |
| 574                                              | Elatiorlabdane B                                                                    | <i>C. elatior</i> <sup>186</sup>       | NA | NA |  |



|     |                                                                         |                                      |                                                                                                                                                                                                                        |    |                                                                                      |
|-----|-------------------------------------------------------------------------|--------------------------------------|------------------------------------------------------------------------------------------------------------------------------------------------------------------------------------------------------------------------|----|--------------------------------------------------------------------------------------|
| 575 | Serralabdane A                                                          | <i>C. serratus</i> <sup>185</sup>    | NA                                                                                                                                                                                                                     | NA | 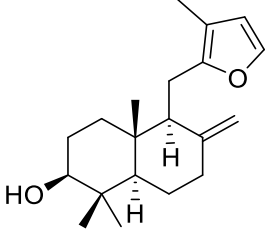  |
| 576 | Multisin A                                                              | <i>C. multistachys</i> <sup>54</sup> | NA                                                                                                                                                                                                                     | NA |   |
| 577 | Henrilabdane A                                                          | <i>C. henryi</i> <sup>128</sup>      | a. Hepatoprotective effect <sup>128</sup><br>IC <sub>50</sub> 0.66 μM<br>b. Antitumor effect <sup>128</sup><br>HCT-8 IC <sub>50</sub> 0.54 μM<br>Bel-7402 IC <sub>50</sub> 1.70 μM<br>BGC-823 IC <sub>50</sub> 5.76 μM | NA |   |
| 578 | (12 <i>S</i> )-12,15-Dihydroxylabda-8(17),13 <i>E</i> -dien-19-oic acid | <i>C. henryi</i> <sup>65</sup>       | NA                                                                                                                                                                                                                     | NA |  |

|     |                                                                                  |                                    |    |    |                                                                                      |
|-----|----------------------------------------------------------------------------------|------------------------------------|----|----|--------------------------------------------------------------------------------------|
| 579 | Elatiorlabdane C                                                                 | <i>C. elatior</i> <sup>186</sup>   | NA | NA | 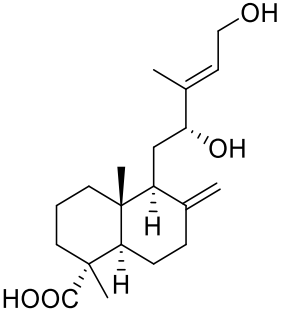  |
| 580 | Serralabdane D                                                                   | <i>C. serratus</i> <sup>185</sup>  | NA | NA |   |
| 581 | (12 <i>R</i> ,13 <i>E</i> )-15-Acetoxy-12-hydroxylabda-8(20),13-dien-19-oic acid | <i>C. anhuiensis</i> <sup>81</sup> | NA | NA |  |

|     |                                                                    |                                      |                                                                    |    |                                                                                                                                                                                                                                                                                                                                                            |
|-----|--------------------------------------------------------------------|--------------------------------------|--------------------------------------------------------------------|----|------------------------------------------------------------------------------------------------------------------------------------------------------------------------------------------------------------------------------------------------------------------------------------------------------------------------------------------------------------|
| 582 | (12 <i>R</i> )-Labda-8(17),13 <i>E</i> -dien-12,15,19-triol        | <i>C. henryi</i> <sup>65</sup>       | NA                                                                 | NA | 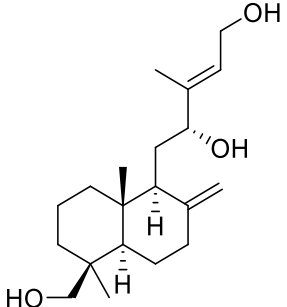 <p>The structure shows a labdane skeleton with a hydroxyl group at C-12 (wedge), a methyl group at C-13 (dash), and a side chain at C-14 containing a hydroxyl group at C-15 (dash) and a terminal hydroxymethyl group at C-19 (wedge).</p>                            |
| 583 | 12 <i>R</i> ,15-Dihydroxylabda-8(17),13 <i>E</i> -dien-19-oic acid | <i>C. multistachys</i> <sup>54</sup> | NA                                                                 | NA |  <p>The structure is identical to the one in row 582, showing a labdane skeleton with hydroxyl groups at C-12 (wedge) and C-15 (dash), and a side chain at C-14 with a hydroxyl group at C-15 (dash) and a terminal hydroxymethyl group at C-19 (wedge).</p>            |
| 584 | Henrilabdane C                                                     | <i>C. henryi</i> <sup>128</sup>      | Hepatoprotective effect <sup>128</sup> IC <sub>50</sub><br>0.18 μM | NA |  <p>The structure is identical to the ones in rows 582 and 583, showing a labdane skeleton with hydroxyl groups at C-12 (wedge) and C-15 (dash), and a side chain at C-14 with a hydroxyl group at C-15 (dash) and a terminal hydroxymethyl group at C-19 (wedge).</p> |

|     |                                                                       |                                      |                                                                    |    |  |
|-----|-----------------------------------------------------------------------|--------------------------------------|--------------------------------------------------------------------|----|--|
| 585 | Henrilabdane B                                                        | <i>C. henryi</i> <sup>128</sup>      | Hepatoprotective effect <sup>128</sup> IC <sub>50</sub><br>0.09 μM | NA |  |
| 586 | (13 <i>S</i> )-13-Hydroxy-19-methoxy-5αH-8(17), 14-labdadien          | <i>C. henryi</i> <sup>128</sup>      | NA                                                                 | NA |  |
| 587 | (12 <i>R</i> ,13 <i>S</i> )-12,13-Dihydroxy-8(17),14-dien-19-oic acid | <i>C. henryi</i> <sup>65</sup>       | NA                                                                 | NA |  |
| 588 | Multisin B                                                            | <i>C. multistachys</i> <sup>54</sup> | NA                                                                 | NA |  |

|     |                                                                     |                                      |    |    |  |
|-----|---------------------------------------------------------------------|--------------------------------------|----|----|--|
| 589 | Multisin C                                                          | <i>C. multistachys</i> <sup>54</sup> | NA | NA |  |
| 590 | 13-Epitorulosol                                                     | <i>C. multistachys</i> <sup>54</sup> | NA | NA |  |
| 591 | 13-Epicupressic acid                                                | <i>C. multistachys</i> <sup>54</sup> | NA | NA |  |
| 592 | (12 <i>R</i> ,13 <i>R</i> )-Dihydroxyabda-8(17),14-dien-19-oic acid | <i>C. multistachys</i> <sup>54</sup> | NA | NA |  |

|                                                        |                                                       |                                   |    |    |                                                                                      |
|--------------------------------------------------------|-------------------------------------------------------|-----------------------------------|----|----|--------------------------------------------------------------------------------------|
| 593                                                    | Serralabdane C                                        | <i>C. serratus</i> <sup>185</sup> | NA | NA | 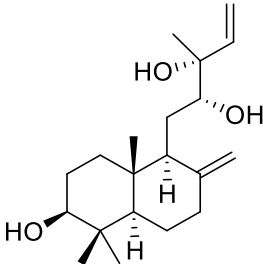  |
| 594                                                    | 7 $\beta$ ,12 $\alpha$ -Dihydroxy-13-epi-manoyl oxide | <i>C. henryi</i> <sup>65</sup>    | NA | NA |   |
| 595                                                    | 7 $\beta$ ,12 $\alpha$ -Dihydroxymanoyl oxide         | <i>C. henryi</i> <sup>65</sup>    | NA | NA |   |
| <b>IV-h. 15-Norlabdane-type diterpenoids (596–597)</b> |                                                       |                                   |    |    |                                                                                      |
| 596                                                    | 15-nor-14-Oxolabda-8(17),12E-dien-19-ol               | <i>C. henryi</i> <sup>65</sup>    | NA | NA |  |

|                                                             |                                                                                |                                      |                                                                                             |    |                                                                                       |
|-------------------------------------------------------------|--------------------------------------------------------------------------------|--------------------------------------|---------------------------------------------------------------------------------------------|----|---------------------------------------------------------------------------------------|
| 597                                                         | 15-nor-14-Oxolabda-8(17),12E-dien-19-oic acid                                  | <i>C. henryi</i> <sup>65</sup>       | NA                                                                                          | NA | 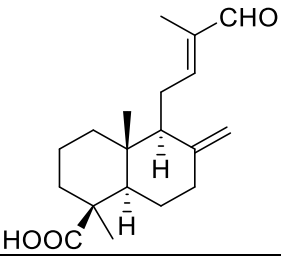   |
| <b>IV-i. 14,15-Dinorlabdane-type diterpenoids (598–599)</b> |                                                                                |                                      |                                                                                             |    |                                                                                       |
| 598                                                         | 14-Methoxy-15,16-dinor-5 $\alpha$ H,9 $\alpha$ H-labda-13(E),8(17)-dien-12-one | <i>C. henryi</i> <sup>78</sup>       | Antitumor effect <sup>78</sup><br>Hela IC <sub>50</sub> 5.6 $\mu$ M<br>K562 and 5.9 $\mu$ M | NA |    |
| 599                                                         | 14,15-Bisnor-13-oxolabda-8(17),11E-dien-19-oic acid                            | <i>C. multistachys</i> <sup>54</sup> | NA                                                                                          | NA |    |
| <b>IV-j. Pimarane-type diterpenoids (600–603)</b>           |                                                                                |                                      |                                                                                             |    |                                                                                       |
| 600                                                         | Chloranhenryin A                                                               | <i>C. henryi</i> <sup>179</sup>      | NA                                                                                          | NA |  |

|                                                  |                                                                |                                       |    |    |  |
|--------------------------------------------------|----------------------------------------------------------------|---------------------------------------|----|----|--|
| 601                                              | 13-Epioryzalexin A                                             | <i>C. henryi</i> <sup>179</sup>       | NA | NA |  |
| 602                                              | <i>ent</i> -Pimar-15-ene-3 $\alpha$ ,8 $\alpha$ -diol          | <i>C. henryi</i> <sup>179</sup>       | NA | NA |  |
| 603                                              | <i>ent</i> -Pimara-8(14),15-diene-3 $\alpha$ ,7 $\beta$ -diol  | <i>C. henryi</i> <sup>179</sup>       | NA | NA |  |
| <b>IV-k. Kaurane-type diterpenoids (604–612)</b> |                                                                |                                       |    |    |  |
| 604                                              | <i>ent</i> -3 $\beta$ -Acetoxyl-kaur-15-en-16 $\beta$ ,17-diol | <i>C. multistachys</i> <sup>187</sup> | NA | NA |  |
| 605                                              | <i>ent</i> -17-Hydroxyl-kaur-15-en-3-one                       | <i>C. multistachys</i> <sup>187</sup> | NA | NA |  |
| 606                                              | <i>ent</i> -17-Hydroxyl-16 $\beta$ -methoxyl-kauran-3-one      | <i>C. multistachys</i> <sup>187</sup> | NA | NA |  |



|                                               |                                                                   |                                       |    |    |  |
|-----------------------------------------------|-------------------------------------------------------------------|---------------------------------------|----|----|--|
| 607                                           | <i>ent</i> -17-Acetoxy-16 $\beta$ -methoxyl-kauran-3-one          | <i>C. multistachys</i> <sup>187</sup> | NA | NA |  |
| 608                                           | Abbeokutone                                                       | <i>C. multistachys</i> <sup>187</sup> | NA | NA |  |
| 609                                           | <i>ent</i> -17 $\alpha$ -Acetyl-16 $\beta$ -hydroxyl-kauran-3-one | <i>C. multistachys</i> <sup>187</sup> | NA | NA |  |
| 610                                           | <i>ent</i> -Kauran-3 $\beta$ ,16 $\beta$ ,17-triol                | <i>C. multistachys</i> <sup>187</sup> | NA | NA |  |
| 611                                           | <i>ent</i> -3 $\beta$ -Acetoxy-kauran-15-en-16 $\beta$ ,17-diol   | <i>C. multistachys</i> <sup>187</sup> | NA | NA |  |
| 612                                           | <i>ent</i> -Kauran-16 $\beta$ ,17-diol                            | <i>C. multistachys</i> <sup>187</sup> | NA | NA |  |
| <b>IV-I. Torarane-type diterpenoids (613)</b> |                                                                   |                                       |    |    |  |

|                                                        |                                                                                                     |                                        |                                                                            |    |                                                                                       |
|--------------------------------------------------------|-----------------------------------------------------------------------------------------------------|----------------------------------------|----------------------------------------------------------------------------|----|---------------------------------------------------------------------------------------|
| 613                                                    | 3 $\alpha$ -Hydroxy- <i>ent</i> -torara-8-en-7,13-dione                                             | <i>C. sessilifolius</i> <sup>183</sup> | NA                                                                         | NA | 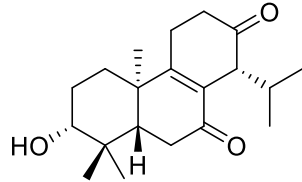   |
| <b>IV-m. 9,11-Secochinane-type diterpenoids (614)</b>  |                                                                                                     |                                        |                                                                            |    |                                                                                       |
| 614                                                    | Chlorabietin F                                                                                      | <i>C. oldhamii</i> <sup>181</sup>      | Anti-neuroinflammatory effect <sup>181</sup> IC <sub>50</sub> 33.8 $\mu$ M | NA |    |
| <b>IV-n. Podocarpane-type diterpenoids (615–617)</b>   |                                                                                                     |                                        |                                                                            |    |                                                                                       |
| 615                                                    | (3 <i>R</i> ,5 <i>S</i> ,9 <i>R</i> ,10 <i>S</i> )-3-Hydroxy- <i>ent</i> -podocarpa-8(14)-en-13-one | <i>C. sessilifolius</i> <sup>183</sup> | NA                                                                         | NA |    |
| 616                                                    | Sessilifol P                                                                                        | <i>C. sessilifolius</i> <sup>178</sup> | NA                                                                         | NA |   |
| 617                                                    | Sessilifol Q                                                                                        | <i>C. sessilifolius</i> <sup>178</sup> | NA                                                                         | NA |  |
| <b>IV-o. Abietane-phloroglucinol adducts (618–620)</b> |                                                                                                     |                                        |                                                                            |    |                                                                                       |

|                                                                |                |                                    |                                                                    |    |                                                                                       |
|----------------------------------------------------------------|----------------|------------------------------------|--------------------------------------------------------------------|----|---------------------------------------------------------------------------------------|
| 618                                                            | Chlorabietol A | <i>C. oldhamii</i> <sup>180</sup>  | PTP1B inhibitory effect <sup>180</sup><br>IC <sub>50</sub> 12.6 μM | NA | 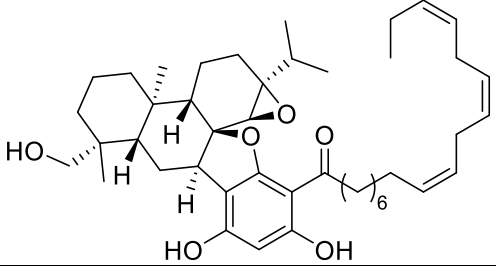   |
| 619                                                            | Chlorabietol B | <i>C. oldhamii</i> <sup>180</sup>  | PTP1B inhibitory effect <sup>180</sup><br>IC <sub>50</sub> 5.3 μM  | NA |    |
| 620                                                            | Chlorabietol C | <i>C. oldhamii</i> <sup>180</sup>  | PTP1B inhibitory effect <sup>180</sup><br>IC <sub>50</sub> 4.9 μM  | NA |    |
| <b>V. Sesquiterpenoid-monoterpenoid heterodimers (621–643)</b> |                |                                    |                                                                    |    |                                                                                       |
| 621                                                            | Ddyosmunoid A  | <i>H. orientale</i> <sup>188</sup> | NA                                                                 | NA |  |

|     |                       |                                        |    |                                                                                                                                                                                                                                                                                         |                                                                                      |
|-----|-----------------------|----------------------------------------|----|-----------------------------------------------------------------------------------------------------------------------------------------------------------------------------------------------------------------------------------------------------------------------------------------|--------------------------------------------------------------------------------------|
| 622 | Sarcaglabrin A        | <i>S. glabra</i> <sup>142</sup>        | NA | NA                                                                                                                                                                                                                                                                                      | 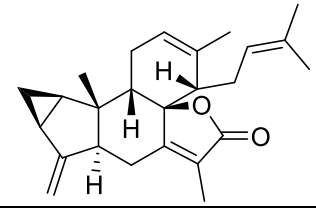  |
| 623 | 7'-Oxyisarcaglabrin A | <i>S. glabra</i> <sup>189</sup>        | NA | NA                                                                                                                                                                                                                                                                                      |   |
| 624 | Bolivianine           | <i>H. angustifolium</i> <sup>190</sup> | NA | <p>First-generation synthetic route from Hagemann's ester (<i>rac</i>-<b>R1</b>), and second/third-generation synthetic routes from (+)-verbenone (<b>R20</b>),<sup>41,42,191</sup> Hodgson's conditions/diazo-derived carbenoid and one pot reaction of DA/IMHDA cascade, Scheme 7</p> |   |
| 625 | Isobolivianine        | <i>H. angustifolium</i> <sup>190</sup> | NA | <p>Treatment of bolivianine with <i>p</i>-TsOH in THF at 35 °C for 24 h yielded isobolivianine (<b>625</b>),<sup>42</sup> Scheme 7</p>                                                                                                                                                  |  |

|     |                                     |                                    |                                                                     |    |                                                                                      |
|-----|-------------------------------------|------------------------------------|---------------------------------------------------------------------|----|--------------------------------------------------------------------------------------|
| 626 | Dyosmunoid B                        | <i>H. orientale</i> <sup>188</sup> | Antimalarial effect <sup>188</sup><br>EC <sub>50</sub> 0.42 $\mu$ M | NA | 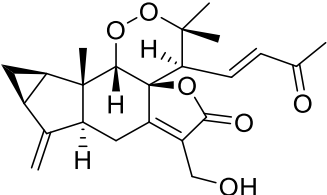  |
| 627 | Sarcaglarone A                      | <i>S. glabra</i> <sup>189</sup>    | NA                                                                  | NA |   |
| 628 | 6 $\alpha$ -Hydroxysarglaperoxide A | <i>S. glabra</i> <sup>189</sup>    | NA                                                                  | NA |   |
| 629 | Sarcaglarol A                       | <i>S. glabra</i> <sup>192</sup>    | Lipogenesis inhibition effect <sup>192</sup>                        | NA |  |

|     |                  |                                 |                                              |    |                                                                                       |
|-----|------------------|---------------------------------|----------------------------------------------|----|---------------------------------------------------------------------------------------|
| 630 | Sarcaglarol B    | <i>S. glabra</i> <sup>192</sup> | NA                                           | NA | 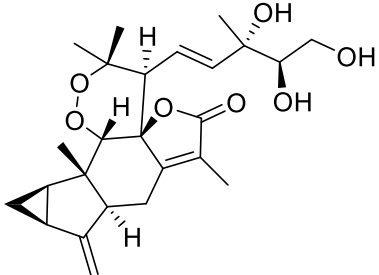   |
| 631 | Sarcaglarol C    | <i>S. glabra</i> <sup>192</sup> | Lipogenesis inhibition effect <sup>192</sup> | NA |    |
| 632 | Sarcaglarol D    | <i>S. glabra</i> <sup>192</sup> | Lipogenesis inhibition effect <sup>192</sup> | NA |    |
| 633 | Sarglaperoxide A | <i>S. glabra</i> <sup>193</sup> | NA                                           | NA |  |

|     |                  |                                 |                                                  |    |  |
|-----|------------------|---------------------------------|--------------------------------------------------|----|--|
| 634 | Sarglaperoxide B | <i>S. glabra</i> <sup>193</sup> | NA                                               | NA |  |
| 635 | Sarglaoxolane A  | <i>S. glabra</i> <sup>194</sup> | Moderate anti-inflammatory effect <sup>194</sup> | NA |  |
| 636 | Sarglaoxolane B  | <i>S. glabra</i> <sup>194</sup> | NA                                               | NA |  |
| 637 | Sarglaoxolane C  | <i>S. glabra</i> <sup>194</sup> | NA                                               | NA |  |

|     |               |                                      |                                  |                                                                                                                                                                        |                                                                                       |
|-----|---------------|--------------------------------------|----------------------------------|------------------------------------------------------------------------------------------------------------------------------------------------------------------------|---------------------------------------------------------------------------------------|
| 638 | Hitorin A     | <i>C. japonicus</i> <sup>195</sup>   | NA                               | NA                                                                                                                                                                     | 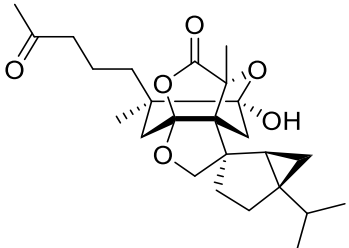   |
| 639 | Hitorin B     | <i>C. japonicus</i> <sup>195</sup>   | NA                               | NA                                                                                                                                                                     |    |
| 640 | Hedyosulide   | <i>H. brasiliense</i> <sup>196</sup> | NA                               | NA                                                                                                                                                                     |    |
| 641 | Orientanoid A | <i>H. orientale</i> <sup>97</sup>    | Antitumor immunity <sup>97</sup> | Synthesized from hedyosumin A ( <b>188</b> ) that is accessible from santonin ( <b>R65</b> ) and <b>R72</b> , <sup>97</sup> biomimetic [4 + 2] dimerization, Scheme 14 |   |
| 642 | Orientanoid B | <i>H. orientale</i> <sup>97</sup>    | Antitumor immunity <sup>97</sup> | Synthesized from hedyosumin A ( <b>188</b> ) that is accessible from santonin ( <b>R65</b> ) and <b>R72</b> , <sup>97</sup> biomimetic [4 + 2] dimerization,           |  |



|                                     |              |                                   |                                                              |                                                                                                                                             |                                                                                      |
|-------------------------------------|--------------|-----------------------------------|--------------------------------------------------------------|---------------------------------------------------------------------------------------------------------------------------------------------|--------------------------------------------------------------------------------------|
|                                     |              |                                   |                                                              | Scheme 14                                                                                                                                   |                                                                                      |
| 643                                 | Orientalin C | <i>H. orientale</i> <sup>97</sup> | Antitumor immunity <sup>97</sup>                             | Synthesized from orientalin A (641), <sup>97</sup> one-pot reaction of singlet oxygen ene addition and IBX-catalyzed dehydration, Scheme 14 | 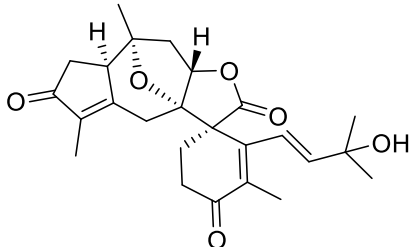  |
| <b>VI. Meroterpenoids (644–682)</b> |              |                                   |                                                              |                                                                                                                                             |                                                                                      |
| 644                                 | Glabratin A  | <i>S. glabra</i> <sup>197</sup>   | Autophagy modulating activity in HEK293 cells <sup>197</sup> | NA                                                                                                                                          |   |
| 645                                 | Glabratin B  | <i>S. glabra</i> <sup>197</sup>   | NA                                                           | NA                                                                                                                                          |  |

|     |             |                                 |                                                              |    |                                                                                                                                                                                                                                                                                                                                                                                                   |
|-----|-------------|---------------------------------|--------------------------------------------------------------|----|---------------------------------------------------------------------------------------------------------------------------------------------------------------------------------------------------------------------------------------------------------------------------------------------------------------------------------------------------------------------------------------------------|
| 646 | glabratin C | <i>S. glabra</i> <sup>197</sup> | NA                                                           | NA | 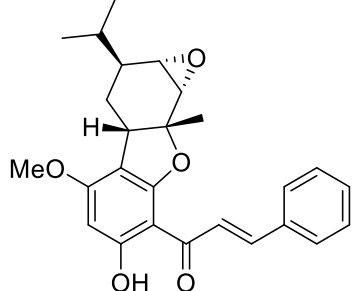 <p>The structure of glabratin C features a central benzene ring with a methoxy group (MeO) at the 6-position and a hydroxyl group (OH) at the 7-position. It is substituted with a 2-isopropyl-2-methyl-1,3-dioxolane ring at the 1-position and a 3-phenylacryloyl group at the 2-position.</p>              |
| 647 | Glabratin D | <i>S. glabra</i> <sup>197</sup> | Autophagy modulating activity in HEK293 cells <sup>197</sup> | NA |  <p>The structure of Glabratin D is similar to glabratin C, but the 2-isopropyl-2-methyl-1,3-dioxolane ring is attached to the benzene ring at the 3-position instead of the 1-position.</p>                                                                                                                   |
| 648 | Glabratin E | <i>S. glabra</i> <sup>197</sup> | Autophagy modulating activity in HEK293 cells <sup>197</sup> | NA |  <p>The structure of Glabratin E features a central benzene ring with a methoxy group (MeO) at the 6-position and a hydroxyl group (OH) at the 7-position. It is substituted with a 2-isopropyl-2-methyl-1,3-dioxolane ring at the 1-position and a 3-(4-methoxyphenyl)propionyl group at the 2-position.</p> |
| 649 | Glabratin F | <i>S. glabra</i> <sup>197</sup> | Autophagy modulating activity in HEK293 cells <sup>197</sup> | NA |  <p>The structure of Glabratin F is similar to Glabratin E, but the 2-isopropyl-2-methyl-1,3-dioxolane ring is attached to the benzene ring at the 3-position instead of the 1-position.</p>                                                                                                                 |

|     |             |                                 |                                                              |    |                                                                                       |
|-----|-------------|---------------------------------|--------------------------------------------------------------|----|---------------------------------------------------------------------------------------|
| 650 | Glabratin G | <i>S. glabra</i> <sup>197</sup> | NA                                                           | NA | 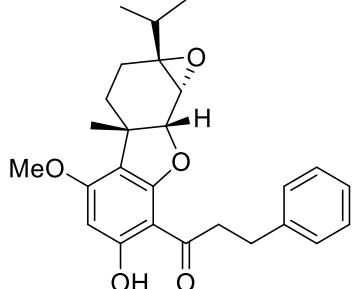   |
| 651 | Glabratin H | <i>S. glabra</i> <sup>197</sup> | NA                                                           | NA |    |
| 652 | Glabratin I | <i>S. glabra</i> <sup>197</sup> | Autophagy modulating activity in HEK293 cells <sup>197</sup> | NA |   |
| 653 | Glabratin J | <i>S. glabra</i> <sup>197</sup> | Autophagy modulating activity in HEK293 cells <sup>197</sup> | NA |  |

|     |             |                                 |                                                              |    |                                                                                       |
|-----|-------------|---------------------------------|--------------------------------------------------------------|----|---------------------------------------------------------------------------------------|
| 654 | Glabratin K | <i>S. glabra</i> <sup>197</sup> | Autophagy modulating activity in HEK293 cells <sup>197</sup> | NA | 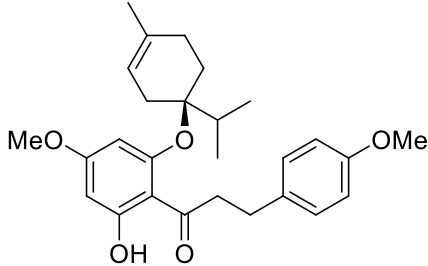   |
| 655 | Glabratin L | <i>S. glabra</i> <sup>197</sup> | Autophagy modulating activity in HEK293 cells <sup>197</sup> | NA |    |
| 656 | Glabratin M | <i>S. glabra</i> <sup>197</sup> | Autophagy modulating activity in HEK293 cells <sup>197</sup> | NA |    |
| 657 | Glabratin N | <i>S. glabra</i> <sup>197</sup> | Autophagy modulating activity in HEK293 cells <sup>197</sup> | NA |  |

|     |             |                                 |                                                              |    |  |
|-----|-------------|---------------------------------|--------------------------------------------------------------|----|--|
| 658 | Linderol A  | <i>S. glabra</i> <sup>197</sup> | NA                                                           | NA |  |
| 659 | Adunctin B  | <i>S. glabra</i> <sup>197</sup> | NA                                                           | NA |  |
| 660 | Adunctin E  | <i>S. glabra</i> <sup>197</sup> | Autophagy modulating activity in HEK293 cells <sup>197</sup> | NA |  |
| 661 | Gabralide A | <i>S. glabra</i> <sup>198</sup> | NA                                                           | NA |  |

|     |              |                                 |    |    |  |
|-----|--------------|---------------------------------|----|----|--|
| 662 | Gabralide B  | <i>S. glabra</i> <sup>198</sup> | NA | NA |  |
| 663 | Glabralide C | <i>S. glabra</i> <sup>198</sup> | NA | NA |  |
| 664 | Gabralide D  | <i>S. glabra</i> <sup>199</sup> | NA | NA |  |
| 665 | Gabralide E  | <i>S. glabra</i> <sup>199</sup> | NA | NA |  |

|     |               |                                   |                                                                       |    |                                                                                       |
|-----|---------------|-----------------------------------|-----------------------------------------------------------------------|----|---------------------------------------------------------------------------------------|
| 666 | Gabralide F   | <i>S. glabra</i> <sup>199</sup>   | NA                                                                    | NA | 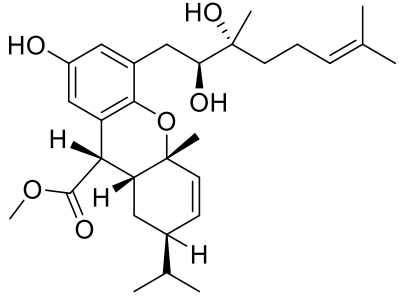   |
| 667 | Gabralide G   | <i>S. glabra</i> <sup>199</sup>   | Anti-neuroinflammatory effect <sup>199</sup> IC <sub>50</sub> 3.92 μM | NA |    |
| 668 | Gabralide H   | <i>S. glabra</i> <sup>199</sup>   | Anti-neuroinflammatory effect <sup>199</sup> IC <sub>50</sub> 4.29 μM | NA |    |
| 669 | Spicatulide A | <i>C. spicatus</i> <sup>200</sup> | NA                                                                    | NA |  |

|     |               |                                   |                                              |    |                                                                                      |
|-----|---------------|-----------------------------------|----------------------------------------------|----|--------------------------------------------------------------------------------------|
| 670 | Spicatulide B | <i>C. spicatus</i> <sup>200</sup> | NA                                           | NA | 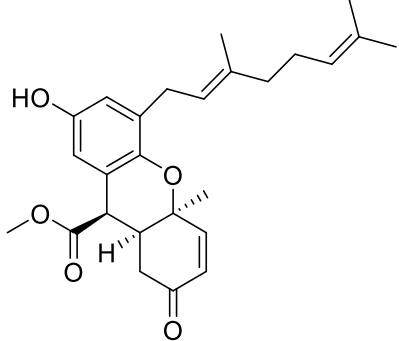  |
| 671 | Spicatulide C | <i>C. spicatus</i> <sup>200</sup> | Lipogenesis inhibition effect <sup>200</sup> | NA |   |
| 672 | Spicatulide D | <i>C. spicatus</i> <sup>200</sup> | NA                                           | NA |  |



|     |                                                                                  |                                   |                                              |    |                                                                                      |
|-----|----------------------------------------------------------------------------------|-----------------------------------|----------------------------------------------|----|--------------------------------------------------------------------------------------|
| 673 | Spicatulide E                                                                    | <i>C. spicatus</i> <sup>200</sup> | Lipogenesis inhibition effect <sup>200</sup> | NA | 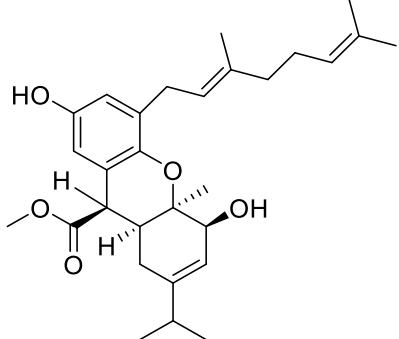  |
| 674 | Spicatulide F                                                                    | <i>C. spicatus</i> <sup>200</sup> | Lipogenesis inhibition effect <sup>200</sup> | NA |   |
| 675 | Spicatulide G                                                                    | <i>C. spicatus</i> <sup>200</sup> | NA                                           | NA |   |
| 676 | Methyl 2-(1' $\beta$ -geranyl-5' $\beta$ -hydroxy-2'-oxocyclohex-3'-enyl)acetate | <i>C. spicatus</i> <sup>200</sup> | NA                                           | NA |  |

|     |                   |                                                             |                                              |                                                                              |  |
|-----|-------------------|-------------------------------------------------------------|----------------------------------------------|------------------------------------------------------------------------------|--|
| 677 | Lettowipyraquinol | <i>C. spicatus</i> <sup>200</sup>                           | Lipogenesis inhibition effect <sup>200</sup> | NA                                                                           |  |
| 678 | Sarglamide A      | <i>S. glabra</i> subsp. <i>brachystachys</i> <sup>201</sup> | NA                                           | NA                                                                           |  |
| 679 | Sarglamide B      | <i>S. glabra</i> subsp. <i>brachystachys</i> <sup>201</sup> | NA                                           | NA                                                                           |  |
| 680 | Sarglamide C      | <i>S. glabra</i> subsp. <i>brachystachys</i> <sup>201</sup> | Anti-neuroinflammatory effect <sup>201</sup> | NA                                                                           |  |
| 681 | Sarglamide D      | <i>S. glabra</i> subsp. <i>brachystachys</i> <sup>201</sup> | Anti-neuroinflammatory effect <sup>201</sup> | Synthesized through a biomimetic approach from 680, <sup>201</sup> Scheme 13 |  |
| 682 | Sarglamide E      | <i>S. glabra</i> subsp. <i>brachystachys</i> <sup>201</sup> | Anti-neuroinflammatory effect <sup>201</sup> | Synthesized through a biomimetic approach from 680, <sup>201</sup> Scheme 13 |  |

#Structures were incorrectly reported as new compounds. NA means no data available.

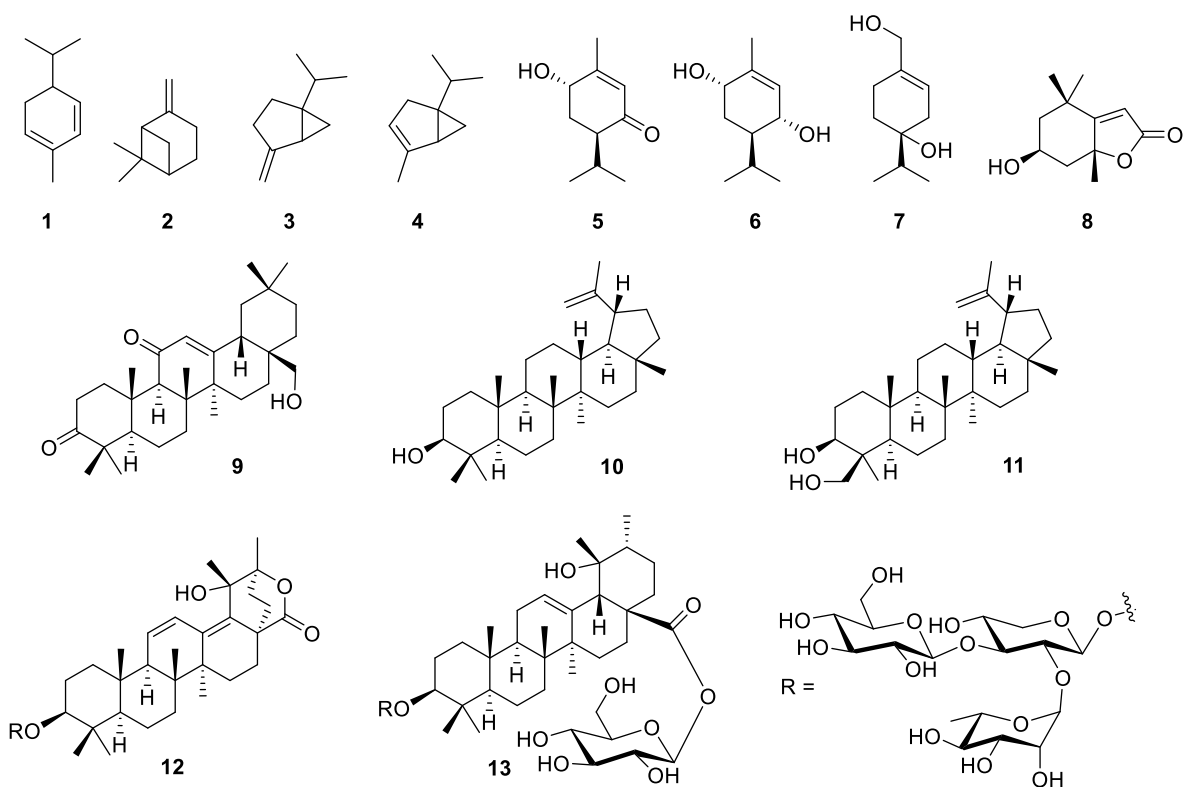

**Fig. S1** Monoterpenoids (1–8) and triterpenoids (9–13) identified from Chloranthaceae.

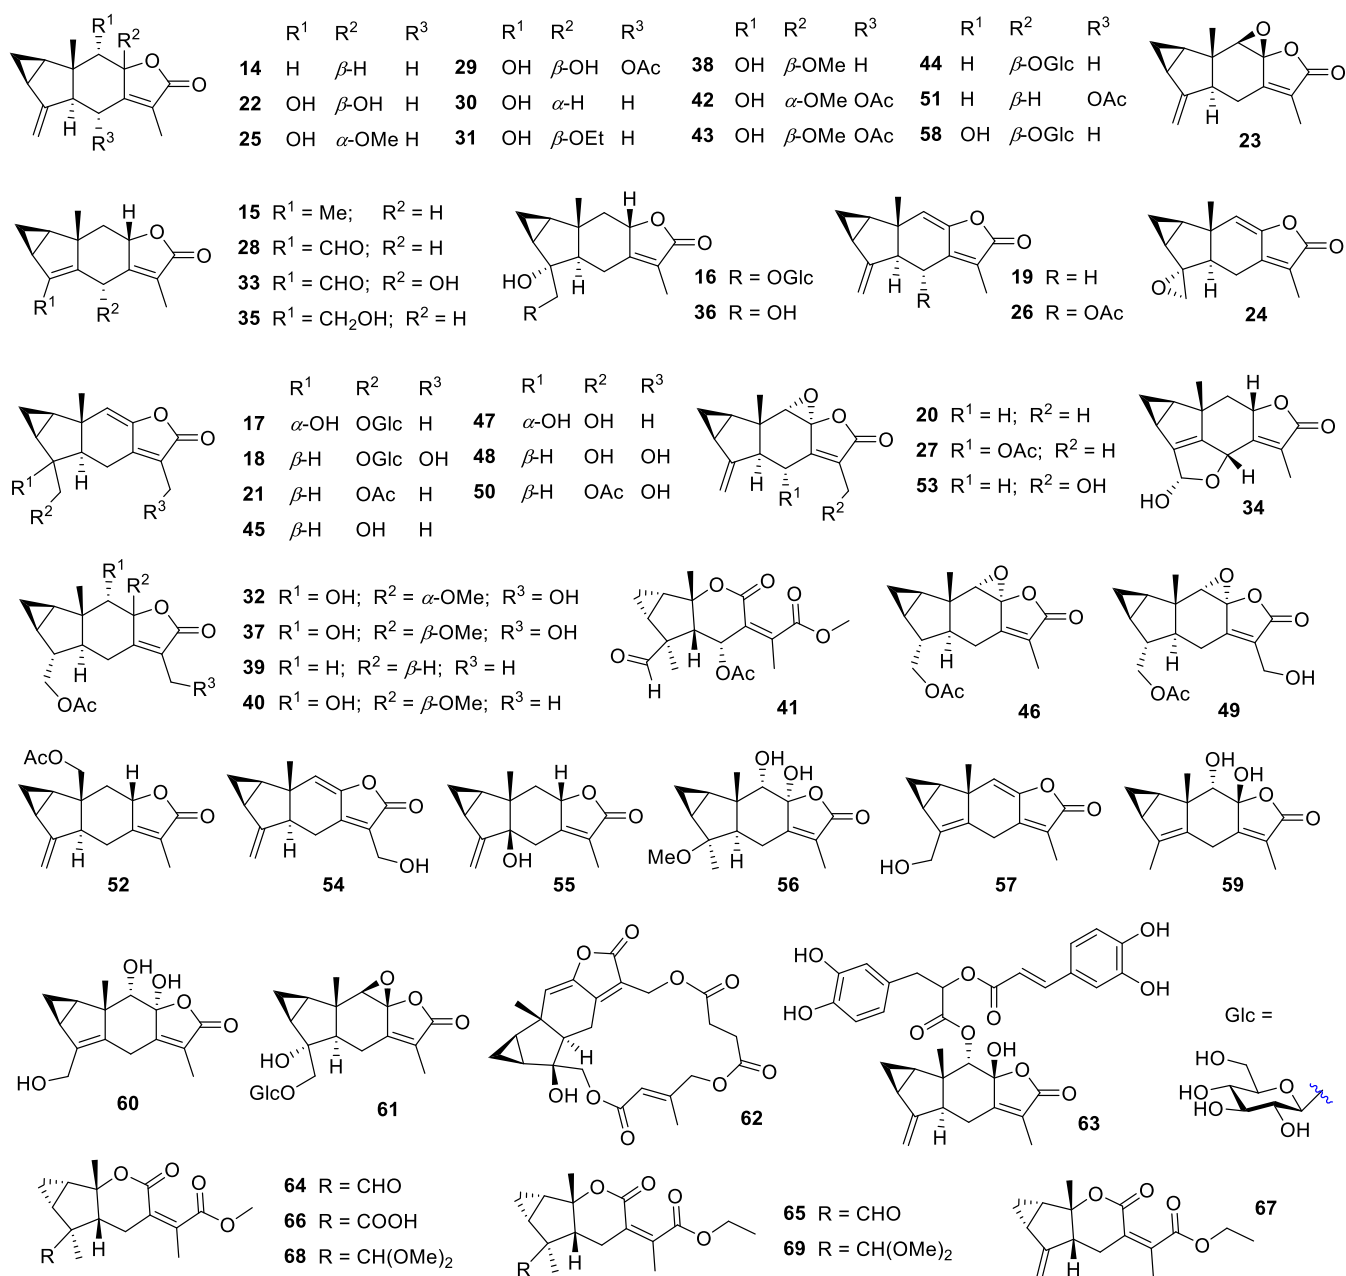

**Fig. S2** Lindenane sesquiterpenoids (**14–69**) identified from Chloranthaceae.

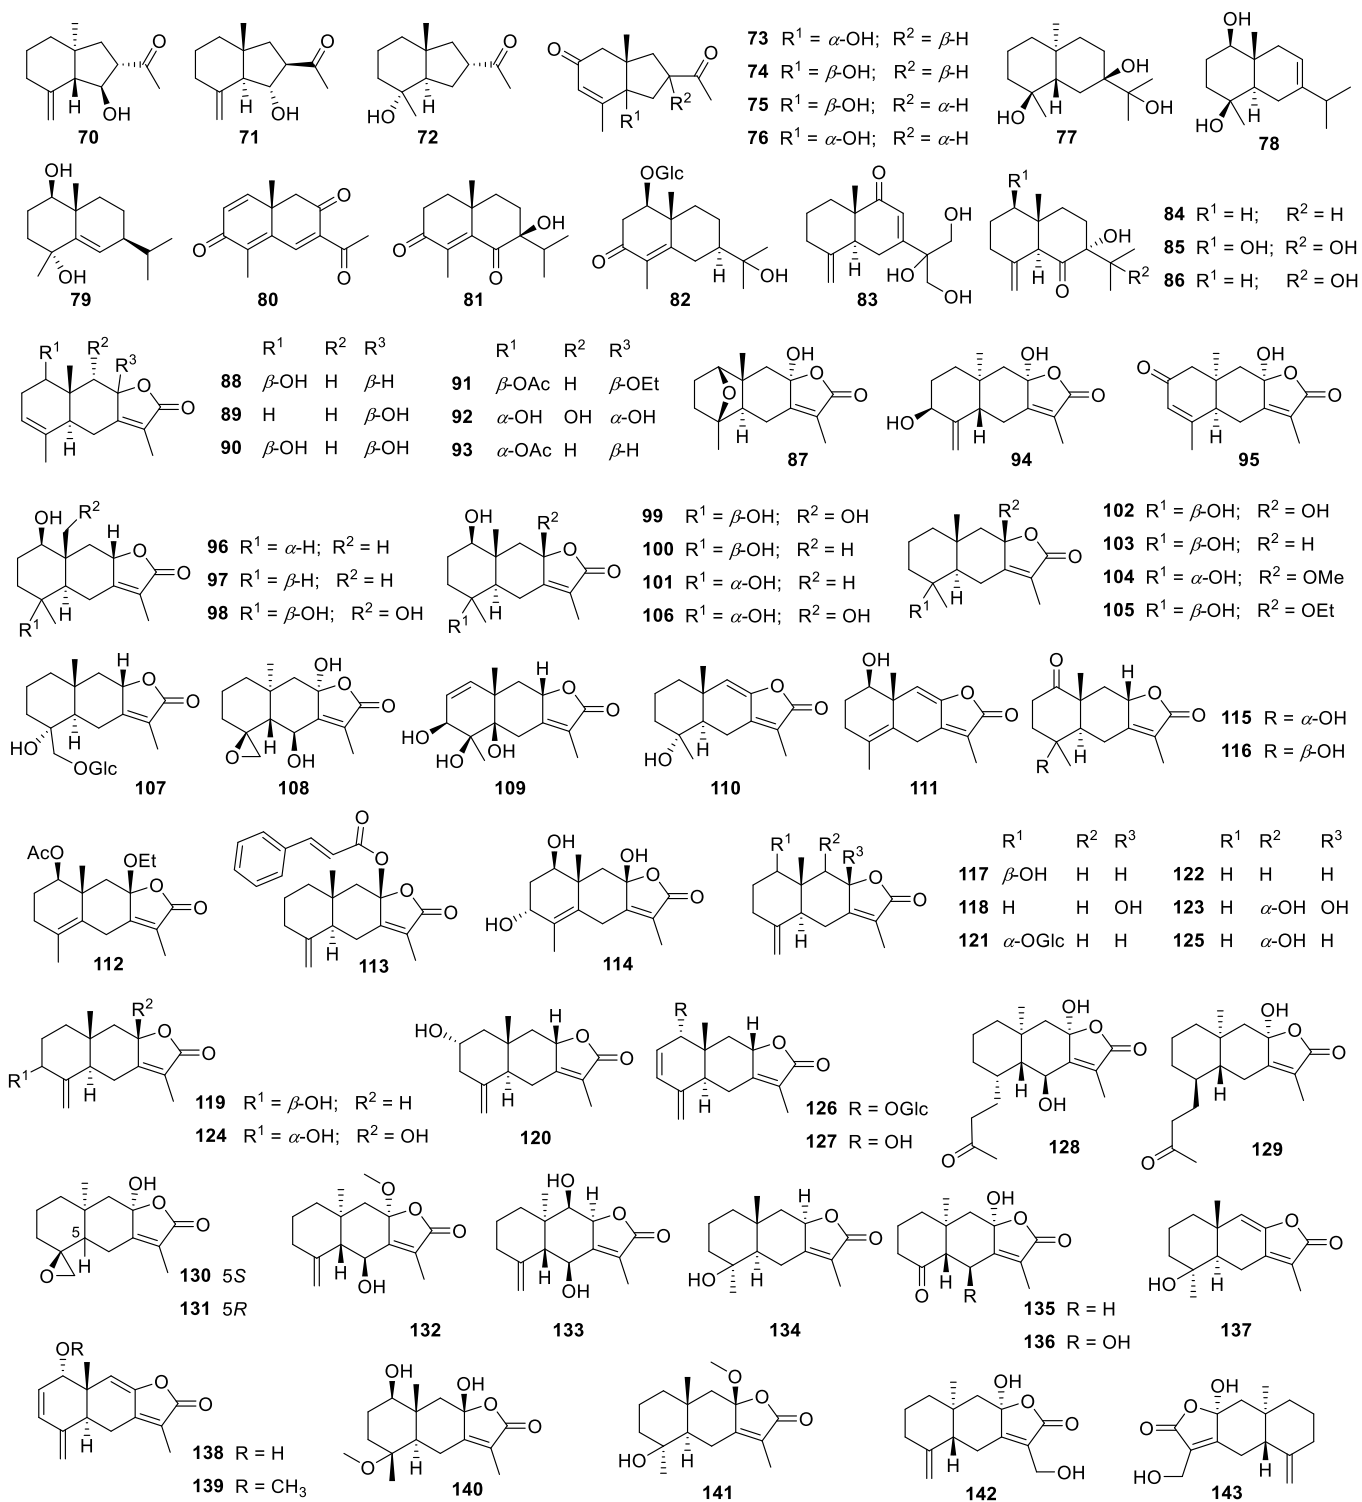

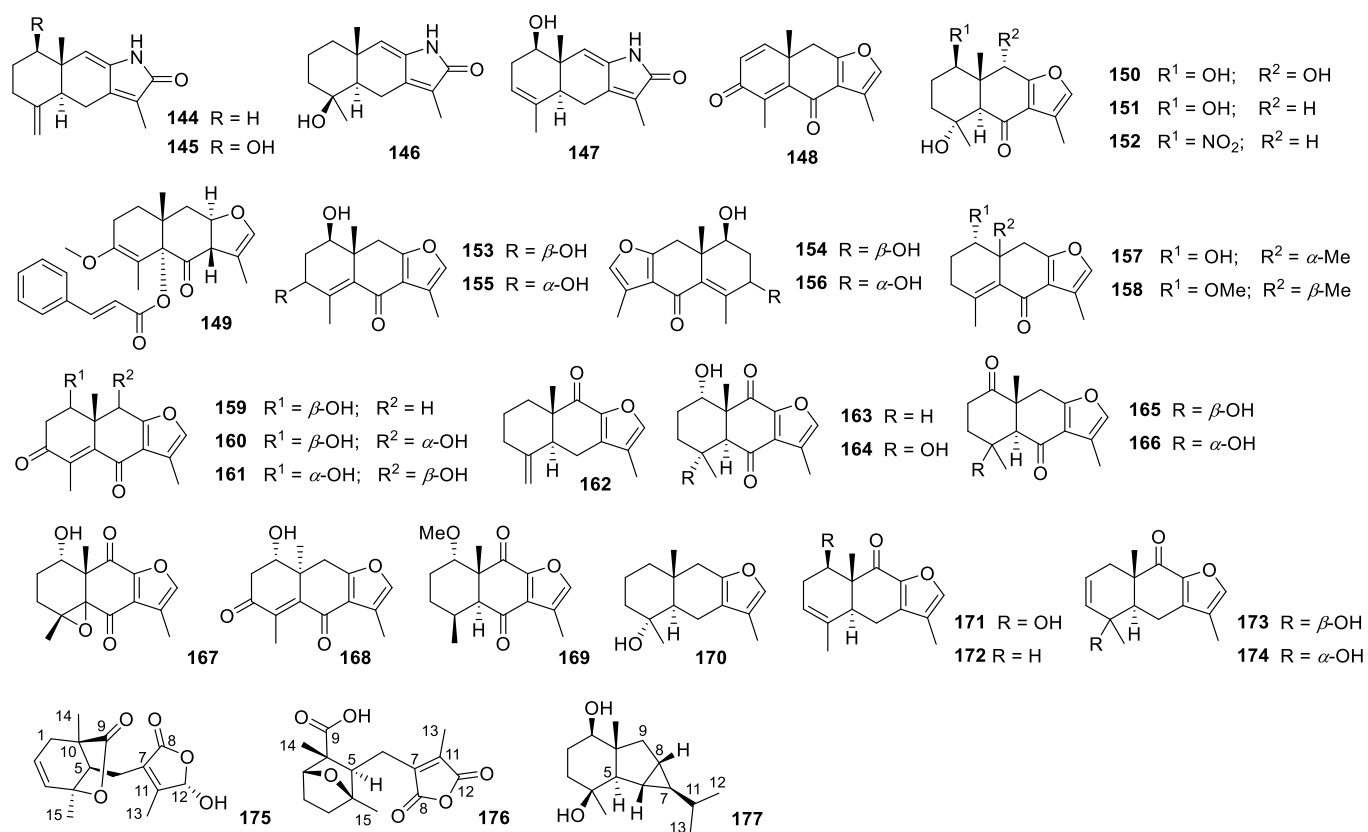

**Fig. S3** Eudesmane sesquiterpenoids (70–177) identified from Chloranthaceae.

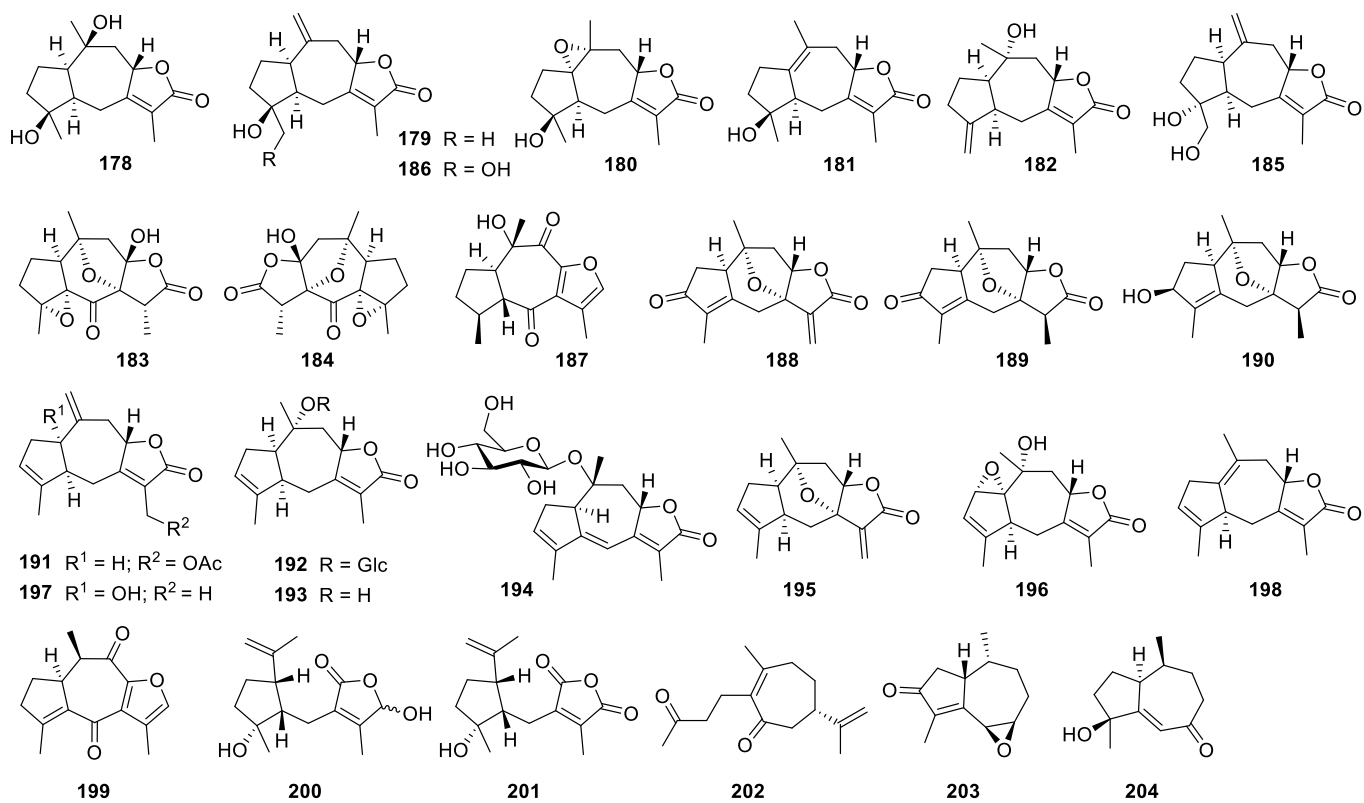

**Fig. S4** Guaianane sesquiterpenoids (**178–204**) identified from Chloranthaceae.

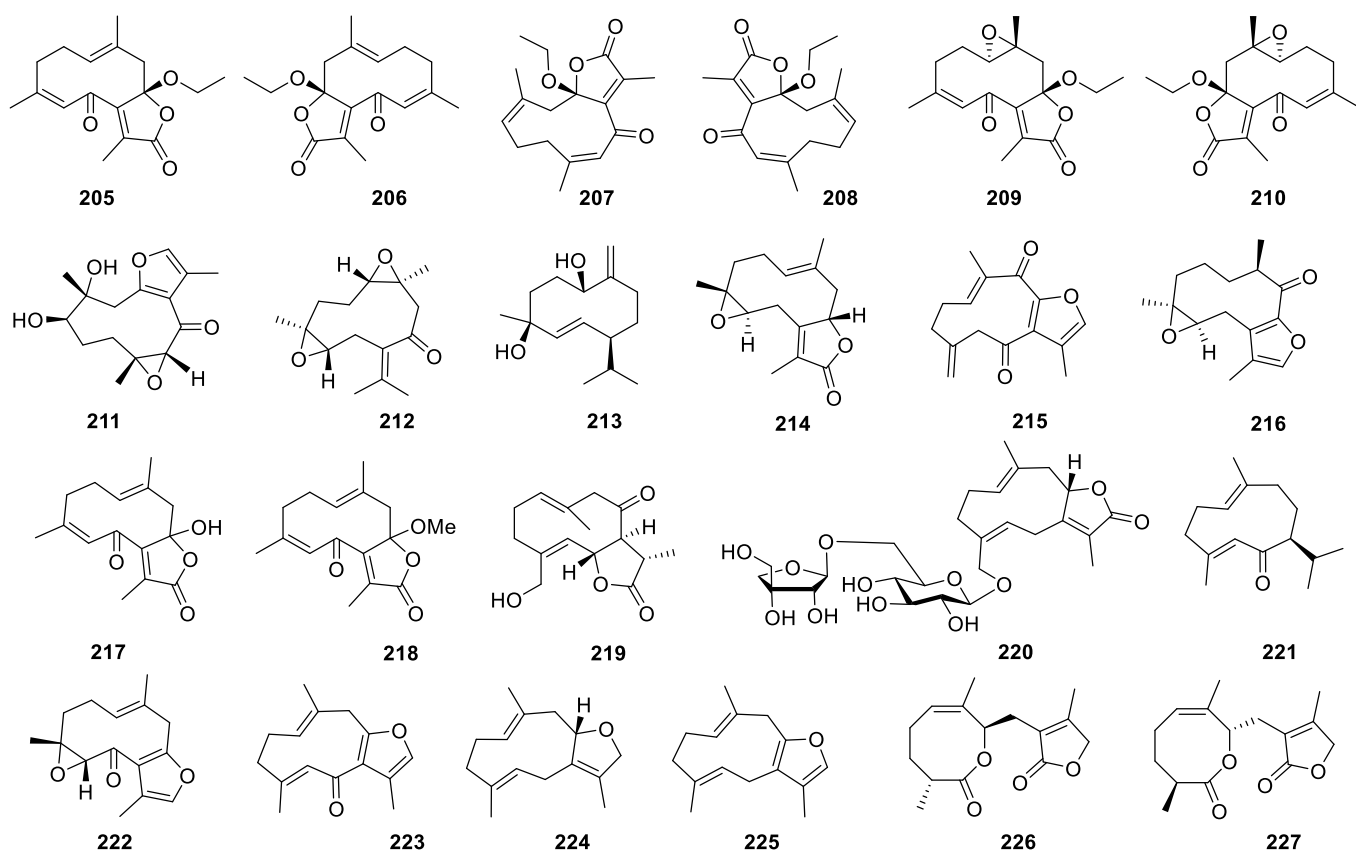

**Fig. S5** Germacranolide sesquiterpenoids (205–227) identified from Chloranthaceae.



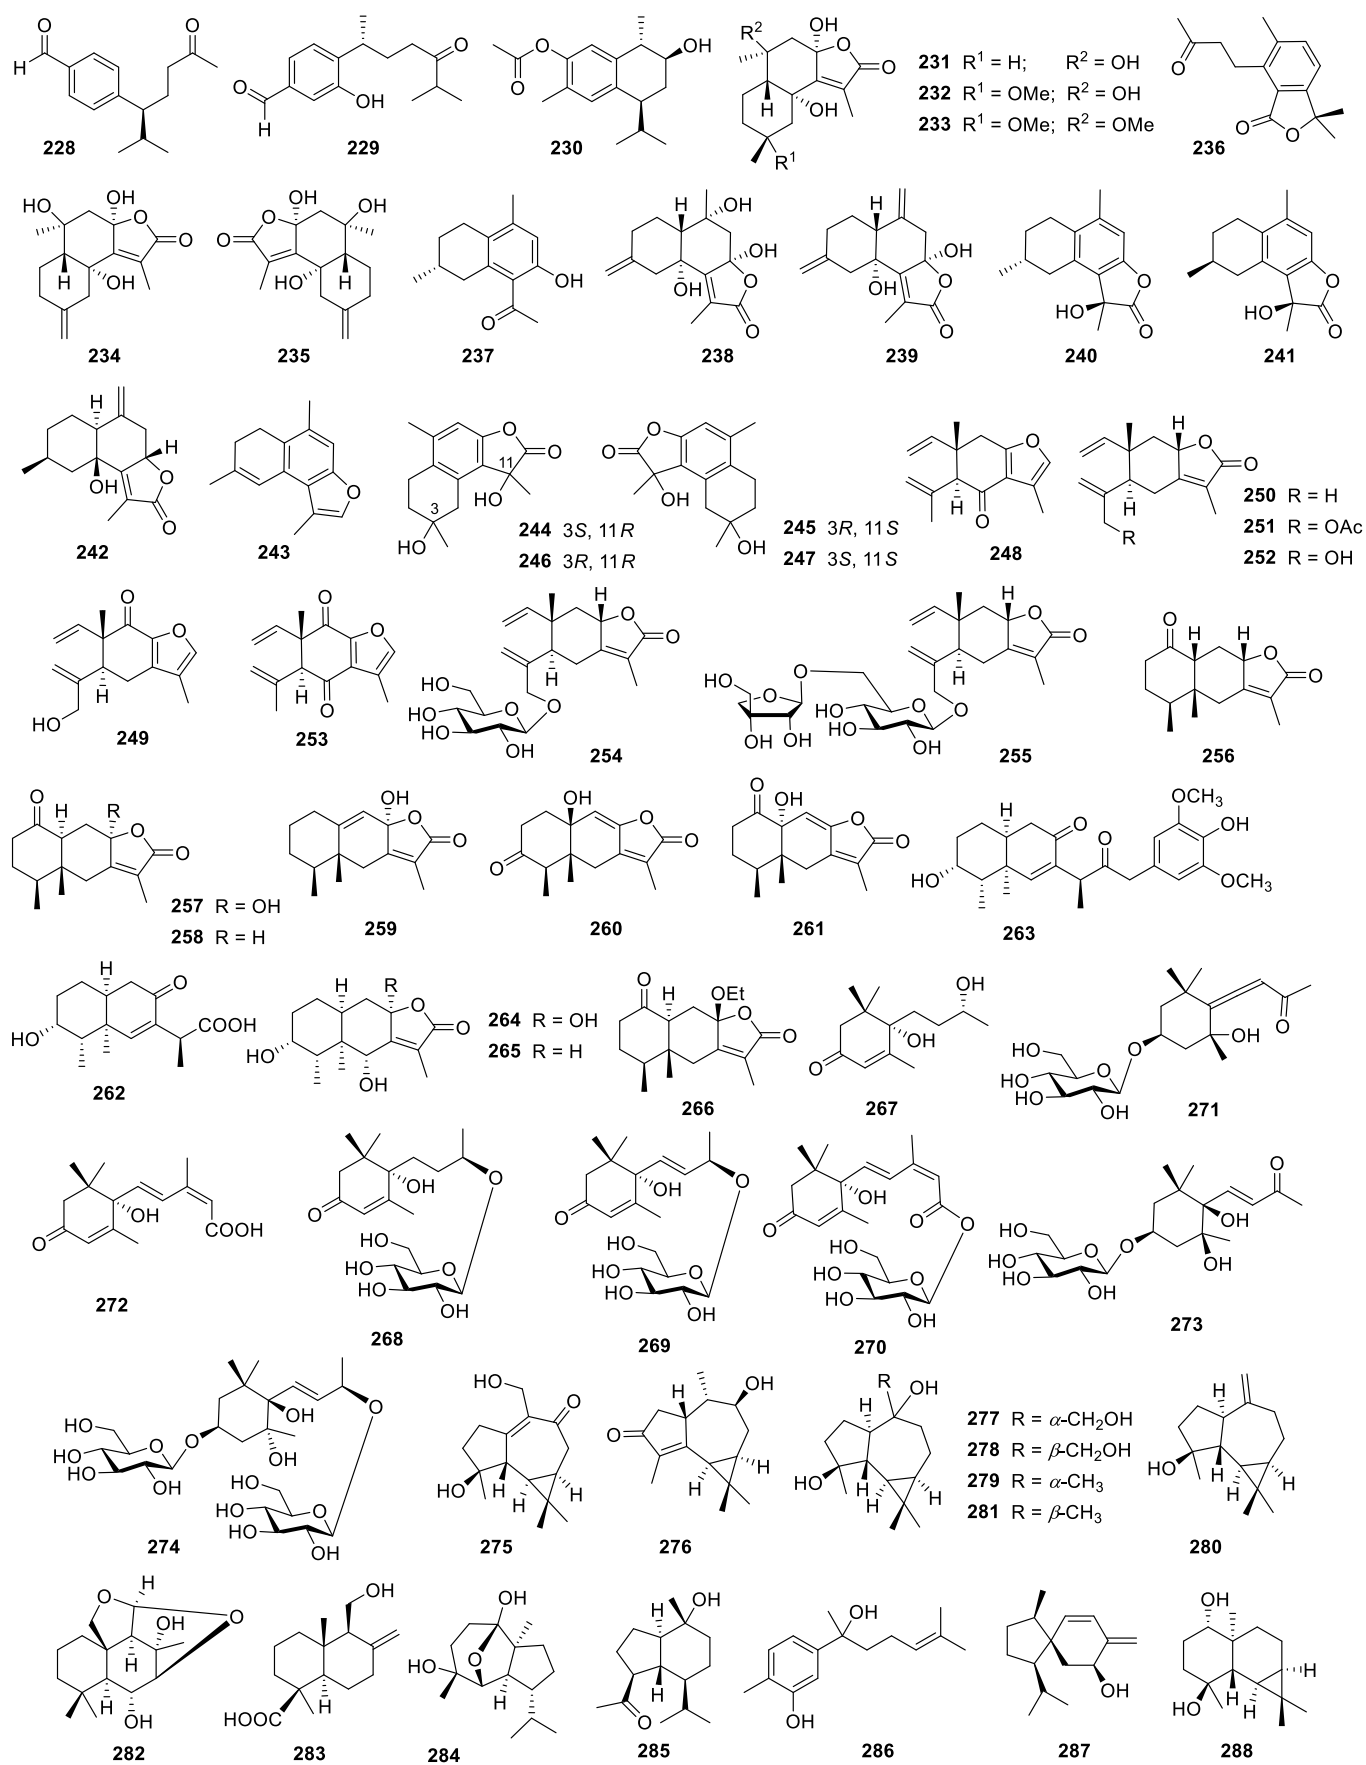

**Fig. S6** Other type sesquiterpenoids (**228–288**) identified from Chloranthaceae.

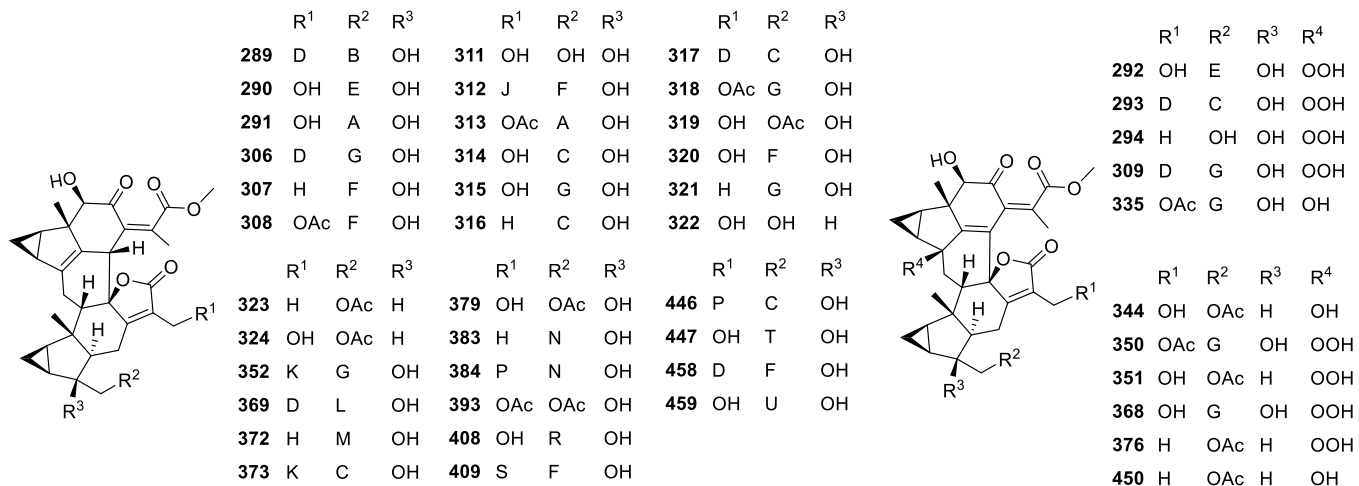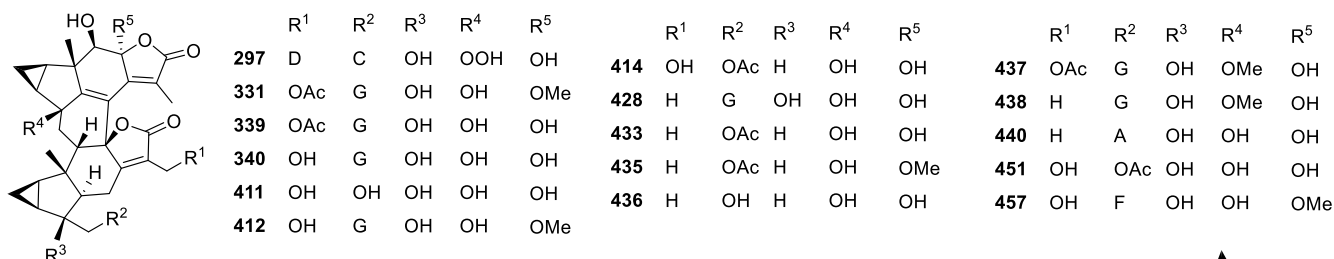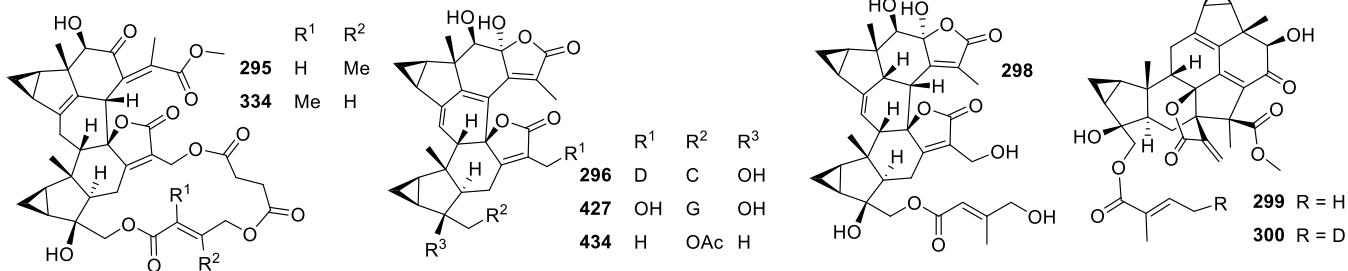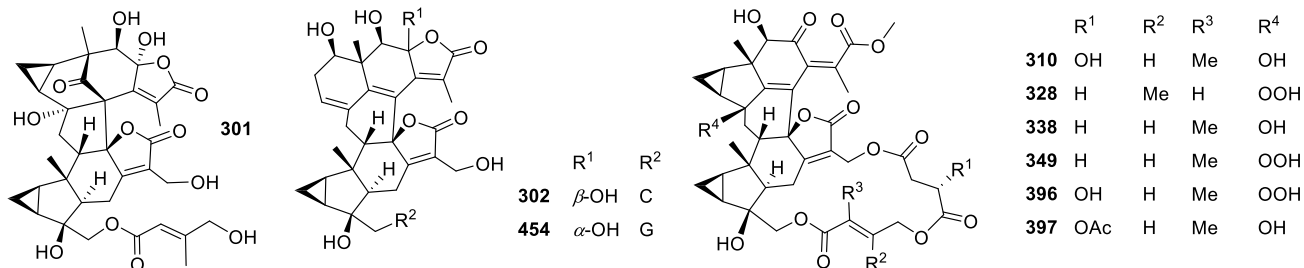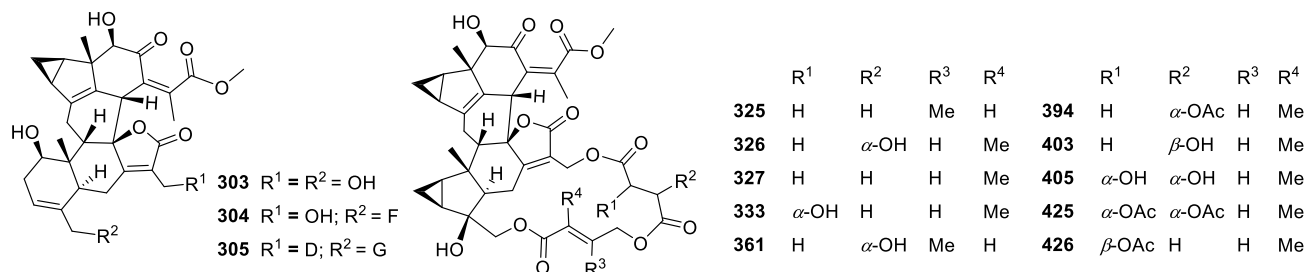

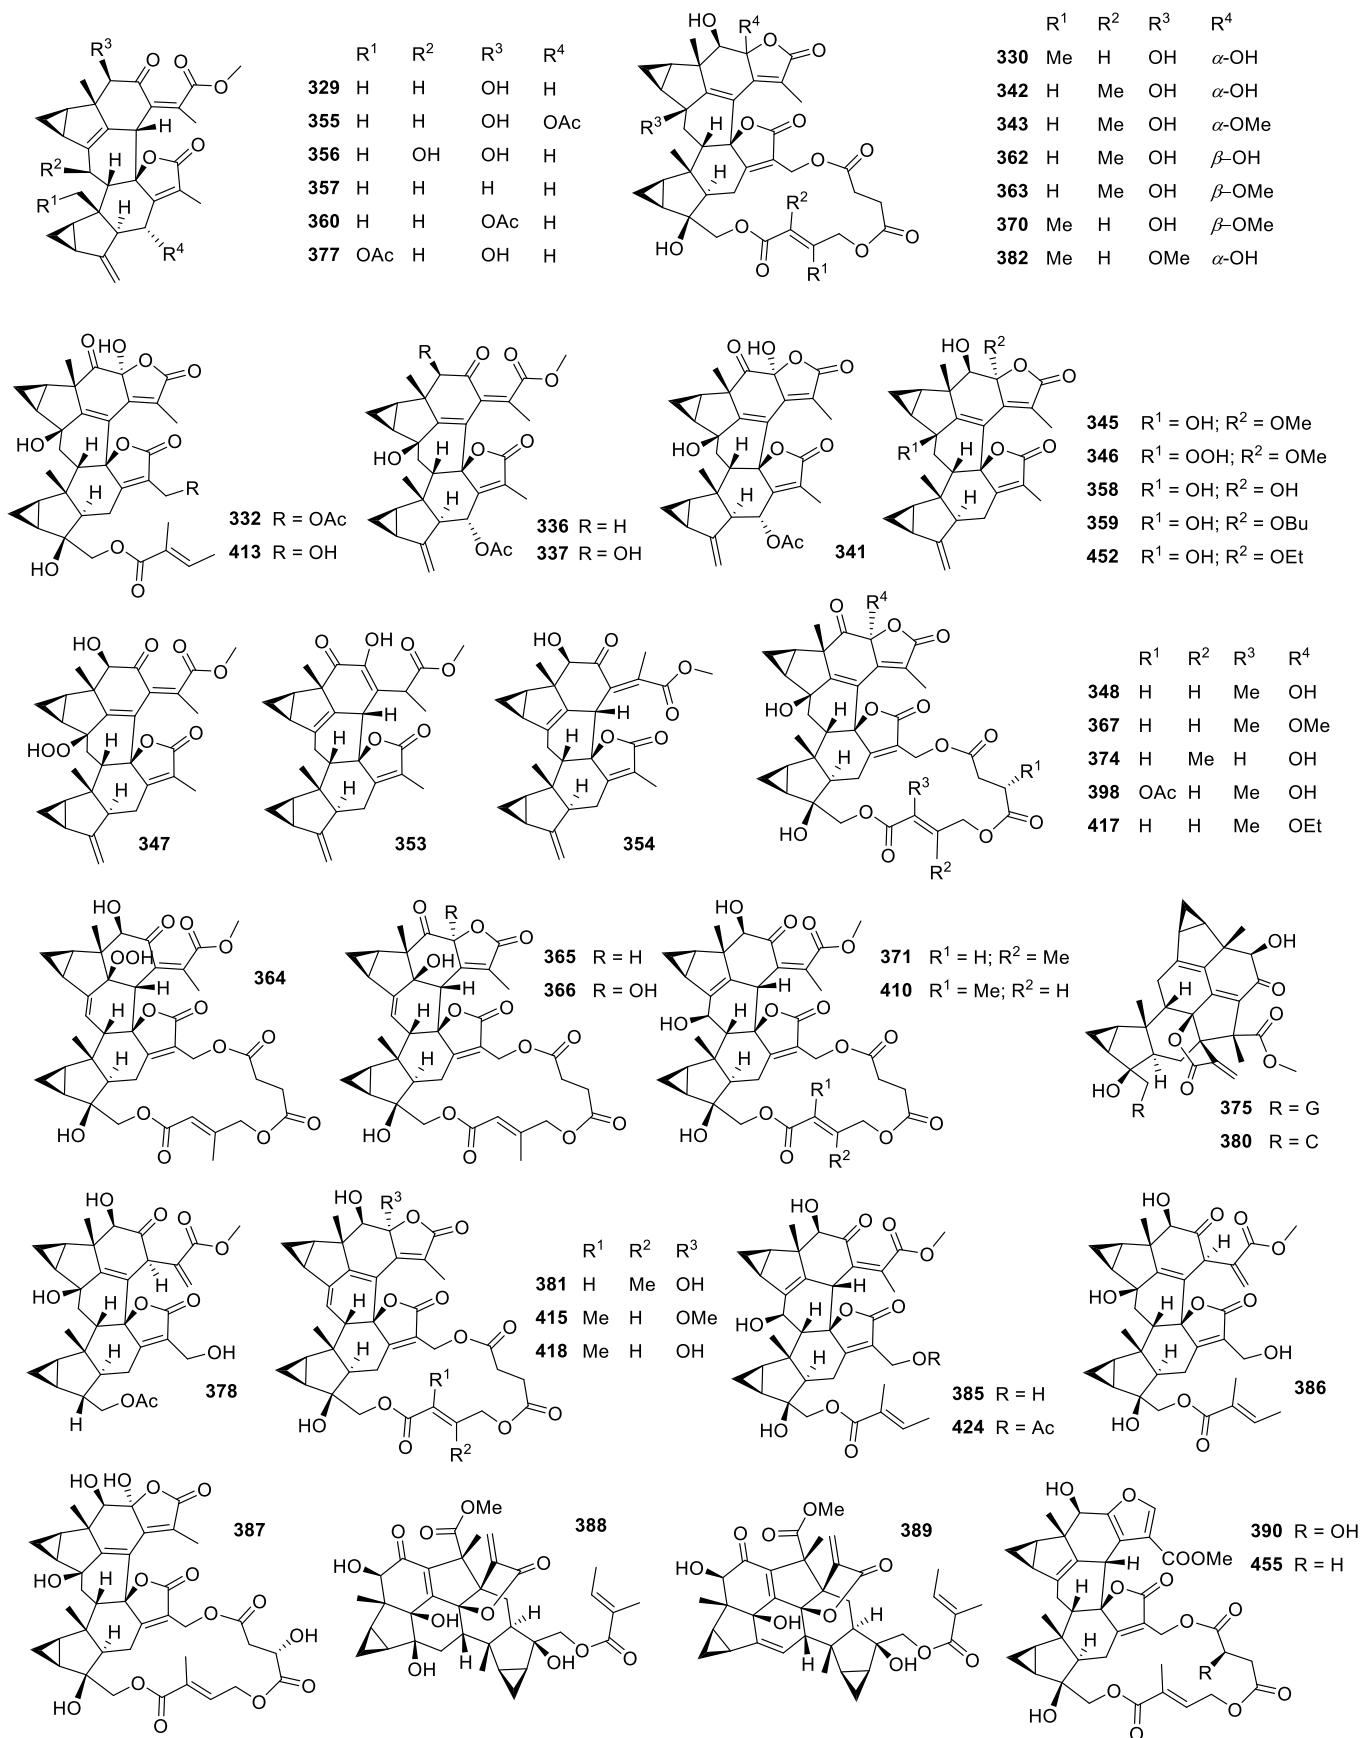

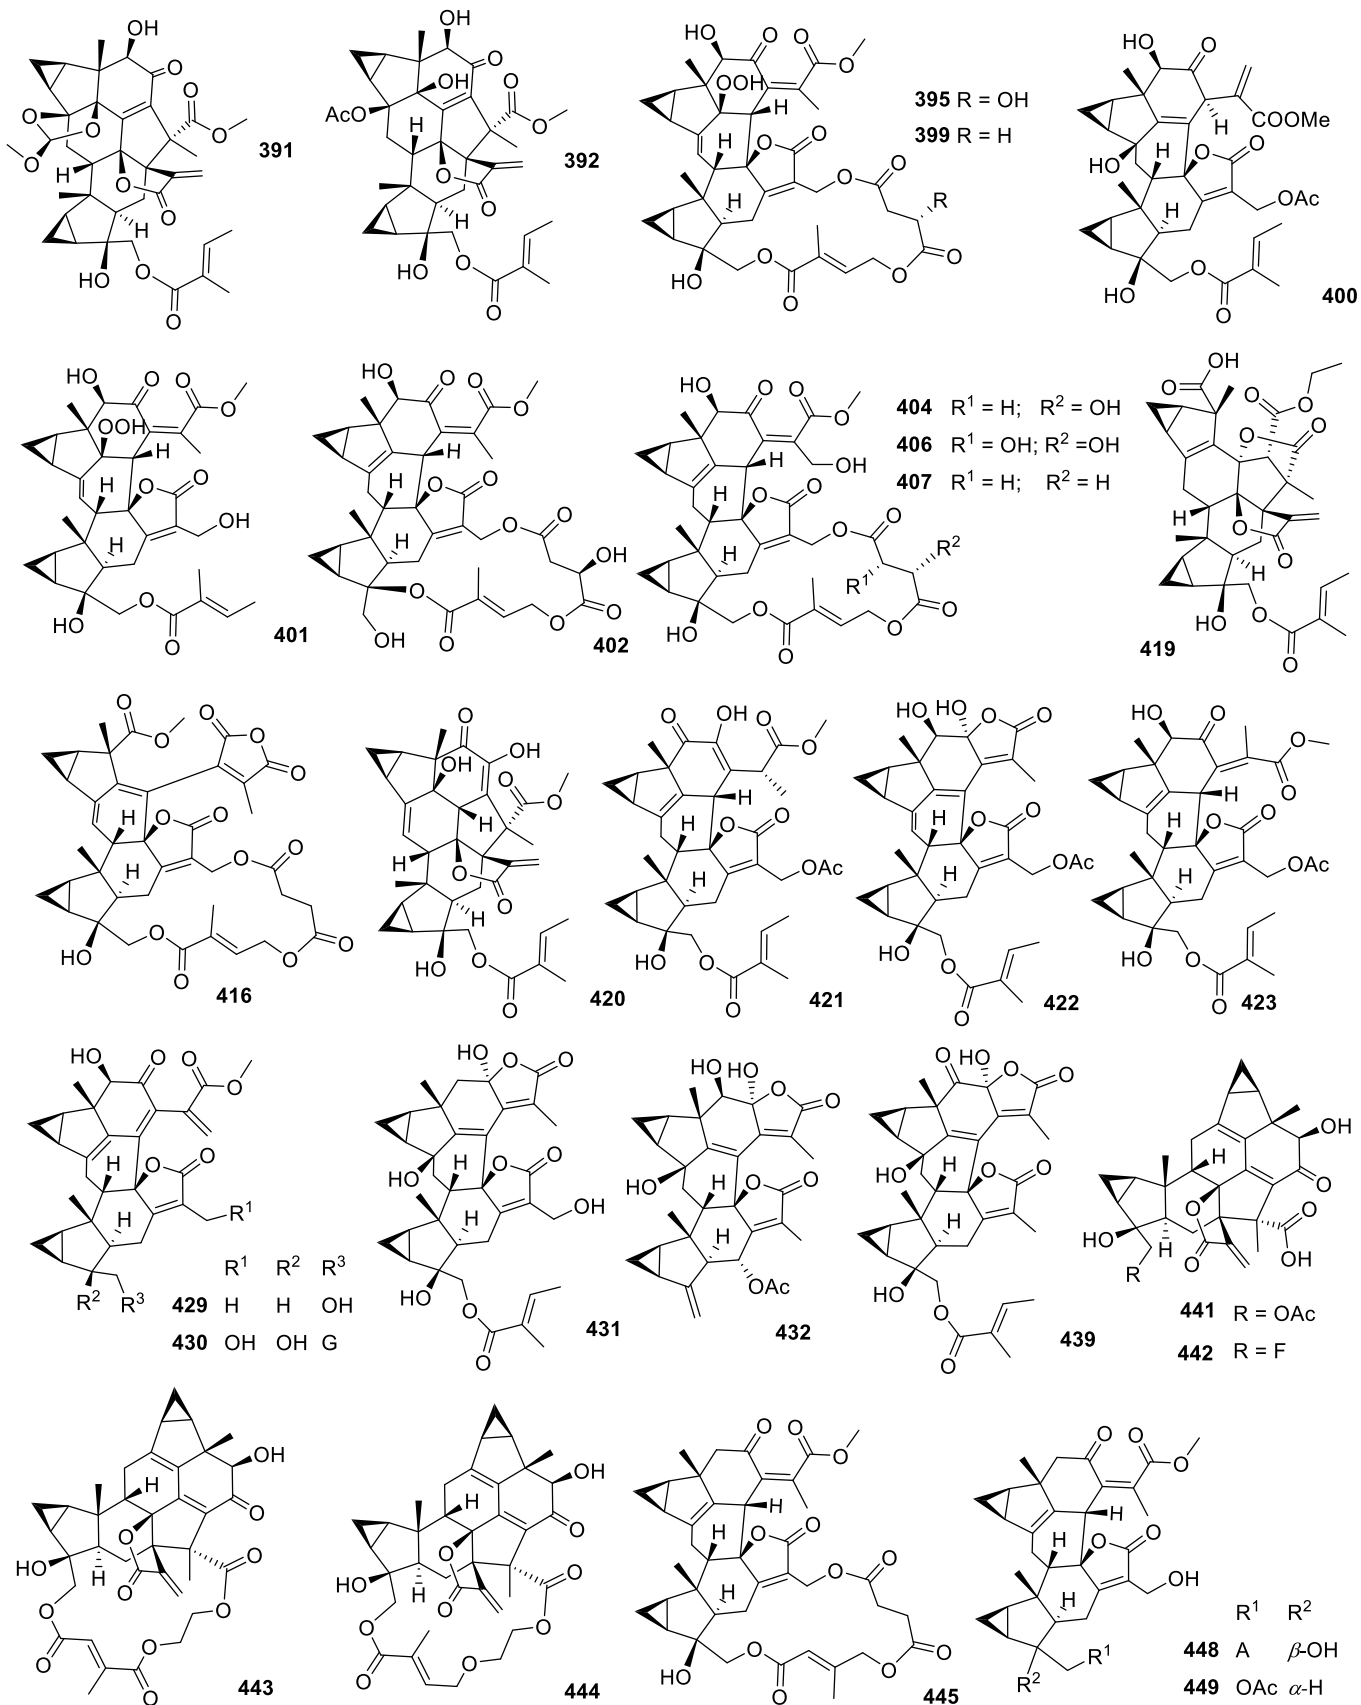

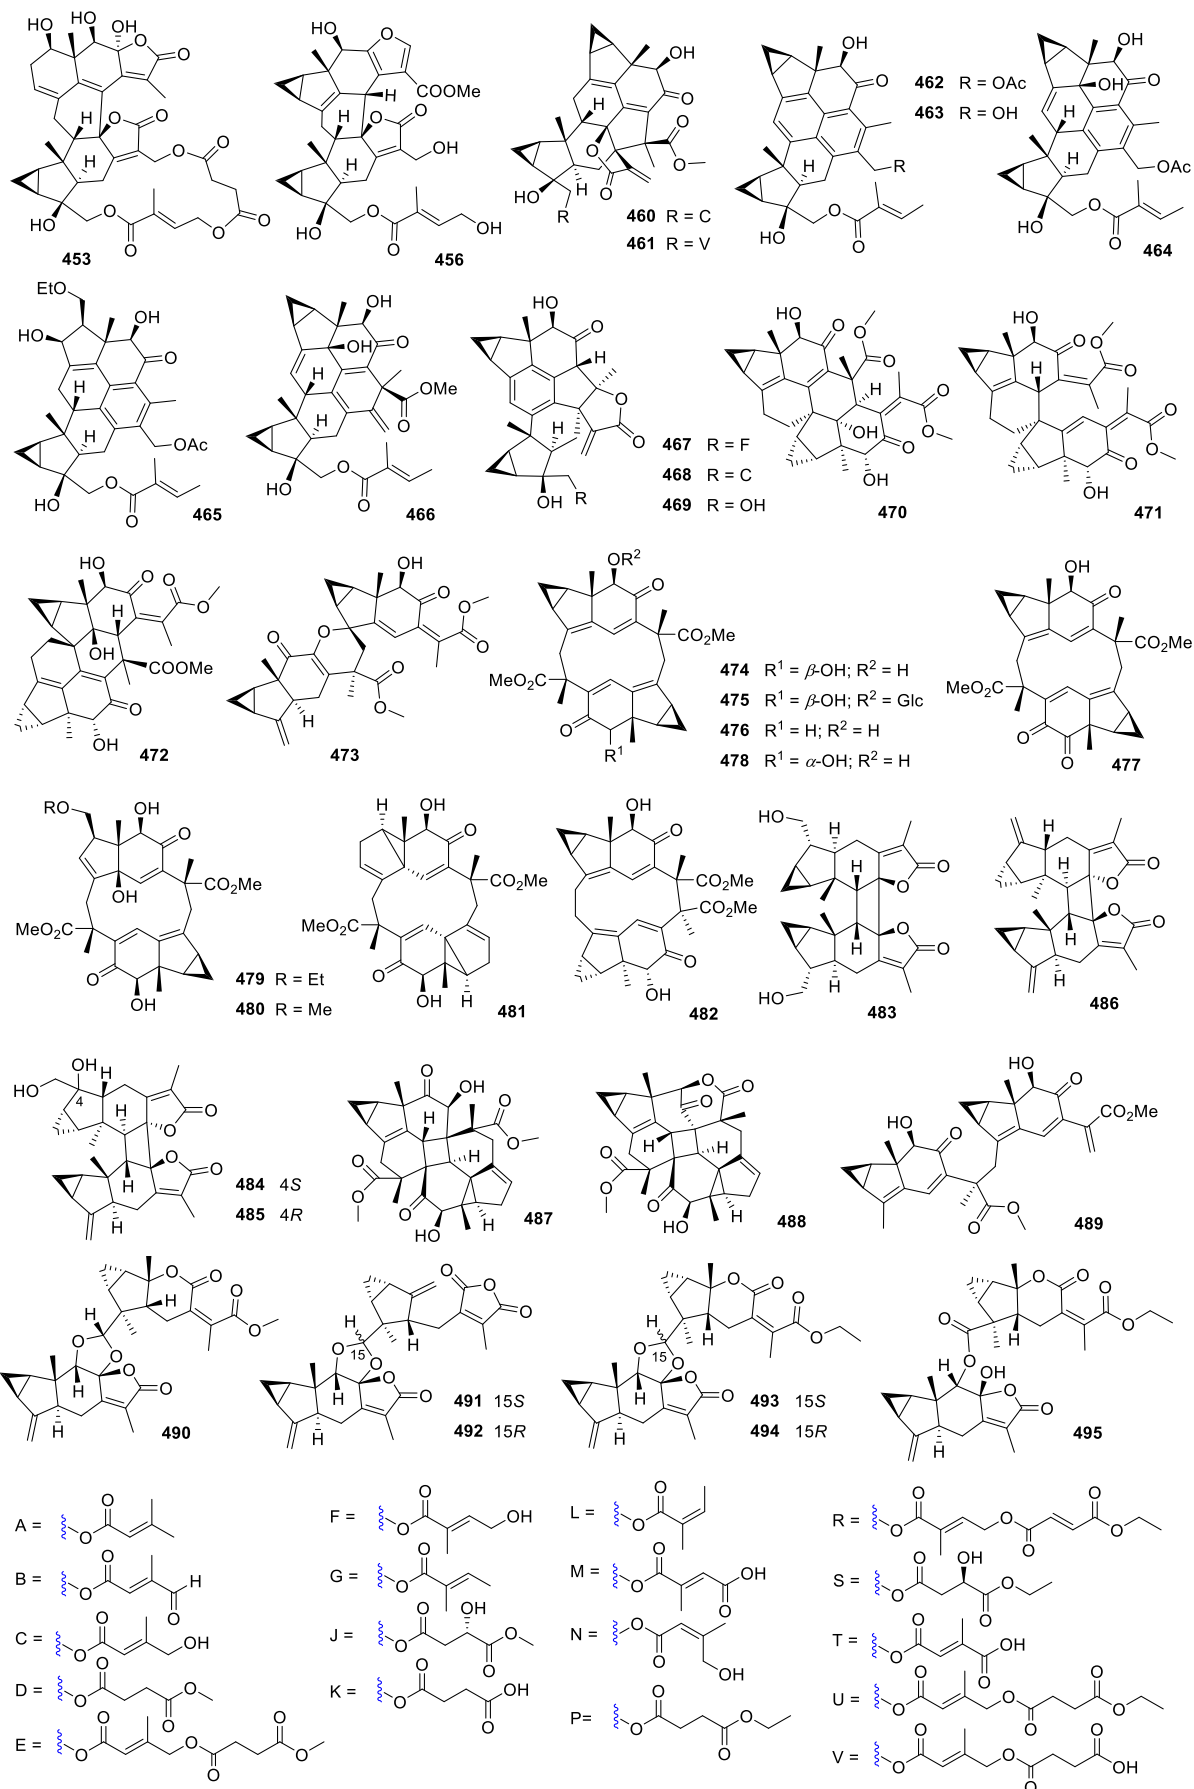

**Fig. S7** Dimeric lindane Sesquiterpenoids (289–495) identified from Chloranthaceae.

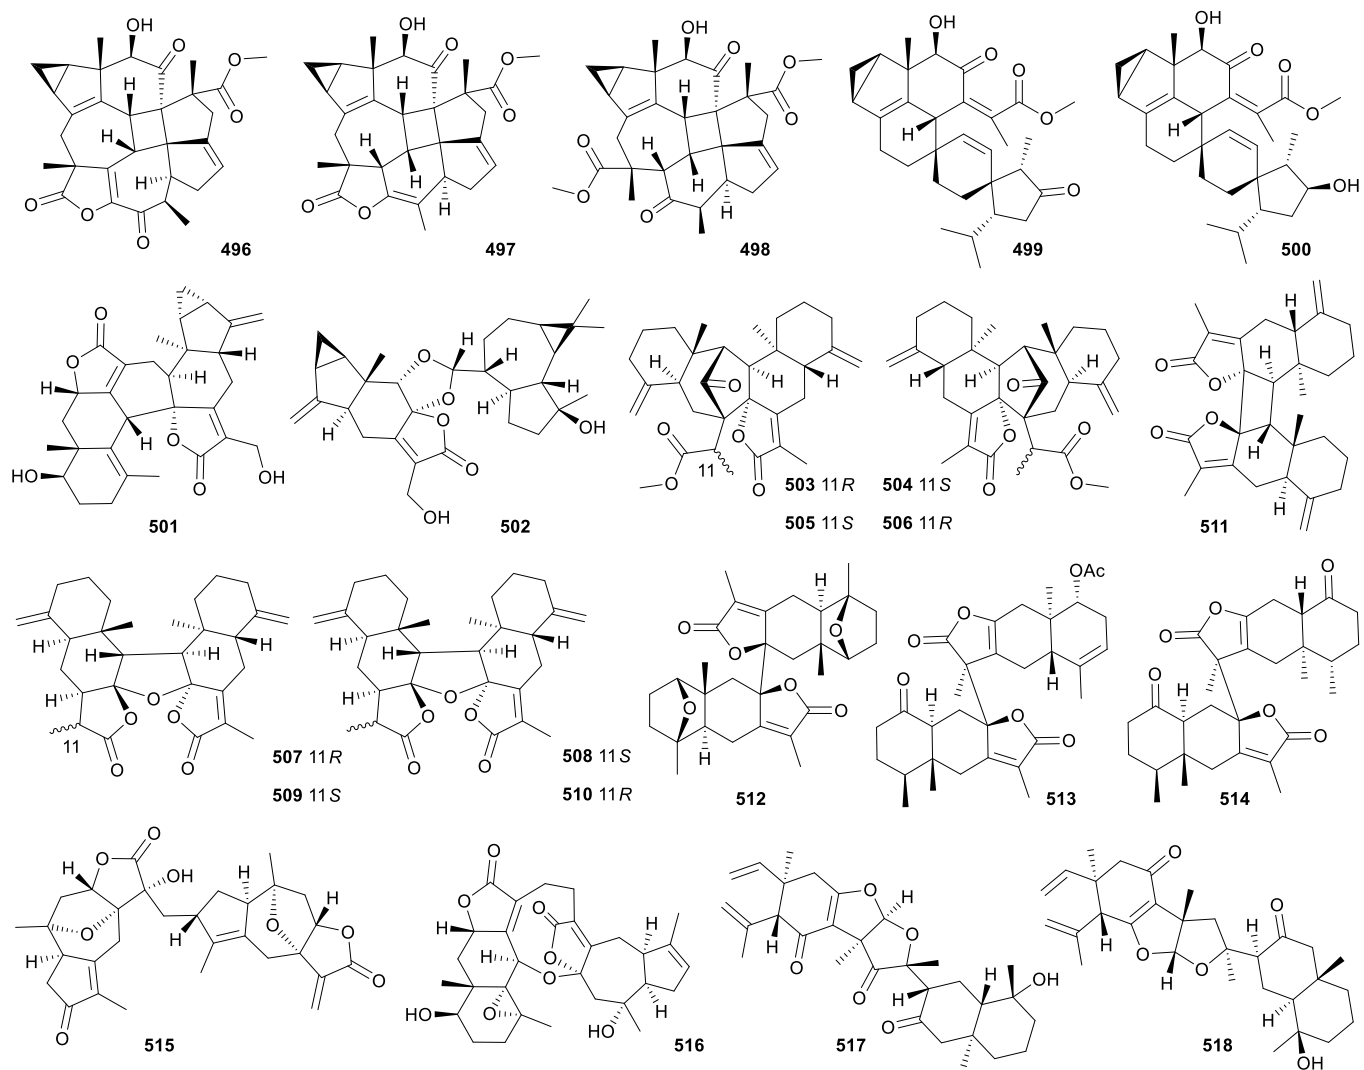

**Fig. S8** Lindenane hetero dimers (496–502) and other sesquiterpenoid dimers (503–518) identified from Chloranthaceae.

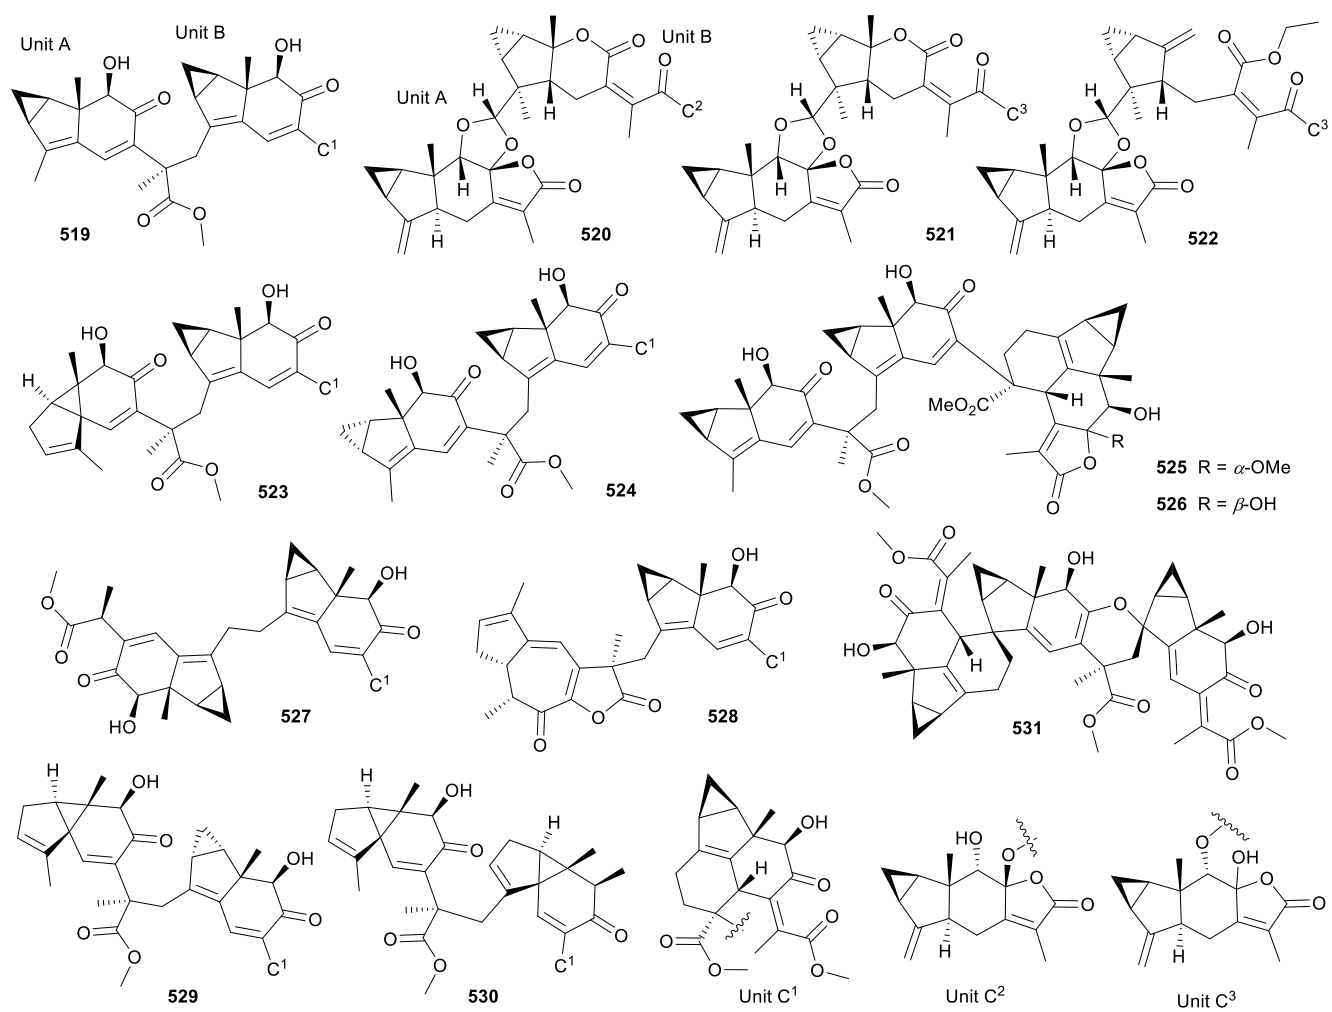

**Fig. S9** Trimeric sesquiterpenoids (519–531) identified from Chloranthaceae

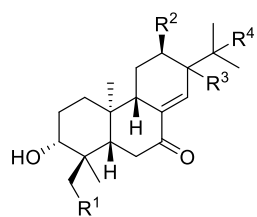

|     | R <sup>1</sup> | R <sup>2</sup> | R <sup>3</sup> | R <sup>4</sup> |
|-----|----------------|----------------|----------------|----------------|
| 532 | H              | H              | $\beta$ -OH    | H              |
| 533 | H              | H              | $\alpha$ -OH   | H              |
| 534 | H              | H              | $\beta$ -OMe   | H              |
| 535 | H              | H              | $\alpha$ -OMe  | H              |
| 536 | H              | OH             | $\beta$ -OMe   | H              |

|     | R <sup>1</sup> | R <sup>2</sup> | R <sup>3</sup> | R <sup>4</sup> |
|-----|----------------|----------------|----------------|----------------|
| 537 | H              | OH             | $\alpha$ -OH   | H              |
| 538 | OH             | H              | $\alpha$ -OH   | H              |
| 539 | H              | H              | $\alpha$ -OH   | OH             |
| 540 | H              | H              | $\alpha$ -OMe  | OH             |

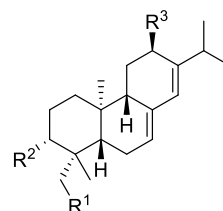

|     | R <sup>1</sup> | R <sup>2</sup> | R <sup>3</sup> |
|-----|----------------|----------------|----------------|
| 541 | OH             | H              | H              |
| 542 | OH             | H              | OMe            |
| 543 | H              | OH             | H              |

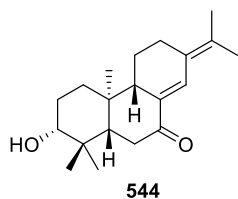

544

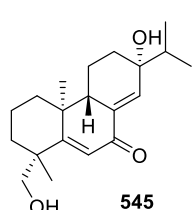

545

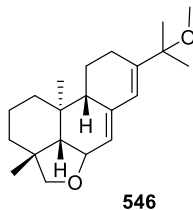

546

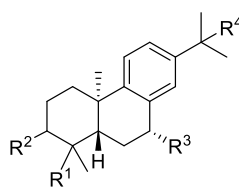

|     | R <sup>1</sup>               | R <sup>2</sup> | R <sup>3</sup> | R <sup>4</sup> |
|-----|------------------------------|----------------|----------------|----------------|
| 547 | Me                           | $\alpha$ -OH   | H              | OH             |
| 548 | Me                           | $\alpha$ -OH   | OH             | H              |
| 549 | $\beta$ -CH <sub>2</sub> OH  | H              | H              | H              |
| 550 | $\alpha$ -CH <sub>2</sub> OH | H              | H              | H              |
| 551 | Me                           | $\alpha$ -OH   | H              | OMe            |
| 552 | Me                           | $\beta$ -OH    | OH             | H              |

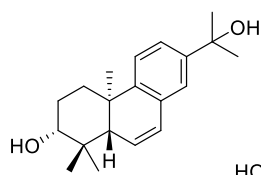

553

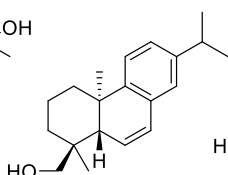

554

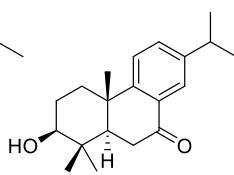

555

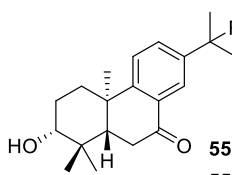556 R = H  
557 R = OH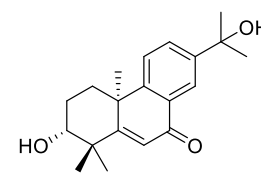

558

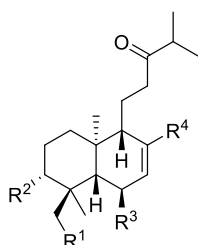

|     | R <sup>1</sup> | R <sup>2</sup> | R <sup>3</sup> | R <sup>4</sup> |
|-----|----------------|----------------|----------------|----------------|
| 559 | H              | OH             | H              | CHO            |
| 560 | H              | OH             | H              | COOH           |
| 561 | H              | OH             | OH             | CHO            |
| 562 | OH             | H              | H              | COOH           |
| 563 | OH             | H              | H              | CHO            |
| 564 | OH             | H              | OH             | CHO            |

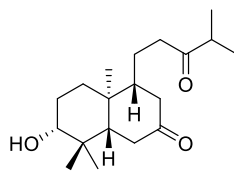

565

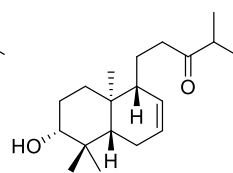

566

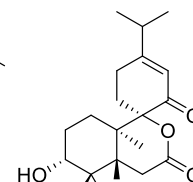

567

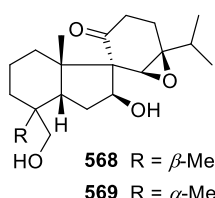568 R =  $\beta$ -Me  
569 R =  $\alpha$ -Me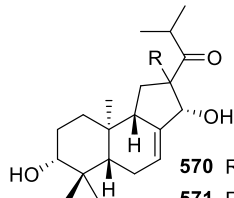570 R =  $\alpha$ -H  
571 R =  $\beta$ -H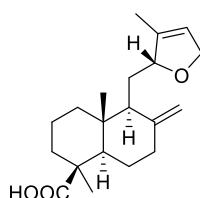

572

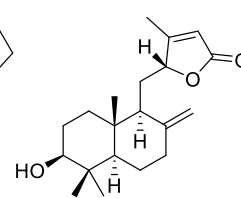

573

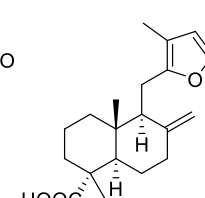

574

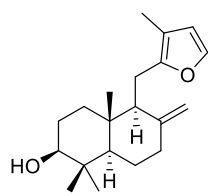

575

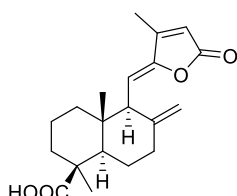

576

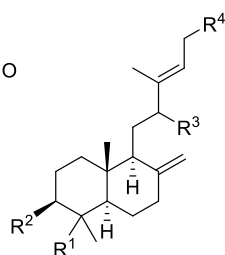

|     | R <sup>1</sup>              | R <sup>2</sup> | R <sup>3</sup> | R <sup>4</sup> |
|-----|-----------------------------|----------------|----------------|----------------|
| 577 | $\beta$ -COOH               | H              | $\alpha$ -OH   | OH             |
| 578 | $\beta$ -COOH               | H              | $\beta$ -OH    | OH             |
| 579 | $\alpha$ -COOH              | H              | $\alpha$ -OH   | OH             |
| 580 | H                           | OH             | $\beta$ -OH    | OEt            |
| 581 | $\beta$ -COOH               | H              | $\alpha$ -OH   | OAc            |
| 582 | $\beta$ -CH <sub>2</sub> OH | H              | $\alpha$ -OH   | OH             |

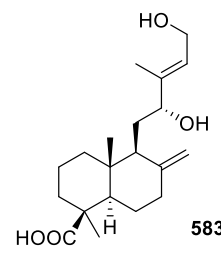

583

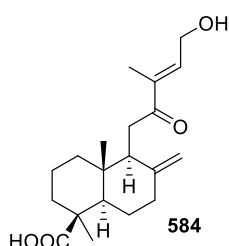

584

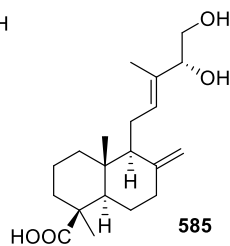

585

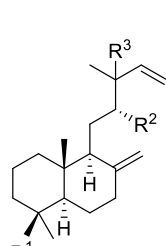

|     | R <sup>1</sup>      | R <sup>2</sup> | R <sup>3</sup> |
|-----|---------------------|----------------|----------------|
| 586 | CH <sub>2</sub> OMe | H              | $\alpha$ -OH   |
| 587 | COOH                | OH             | $\beta$ -OH    |
| 588 | COOH                | OH             | $\alpha$ -OMe  |
| 589 | COOH                | OH             | $\beta$ -OMe   |
| 590 | CH <sub>2</sub> OH  | H              | $\alpha$ -OH   |
| 591 | COOH                | H              | $\alpha$ -OH   |
| 592 | COOH                | OH             | $\alpha$ -OH   |

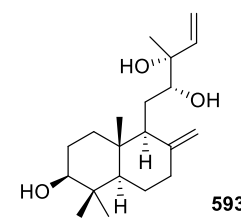

593



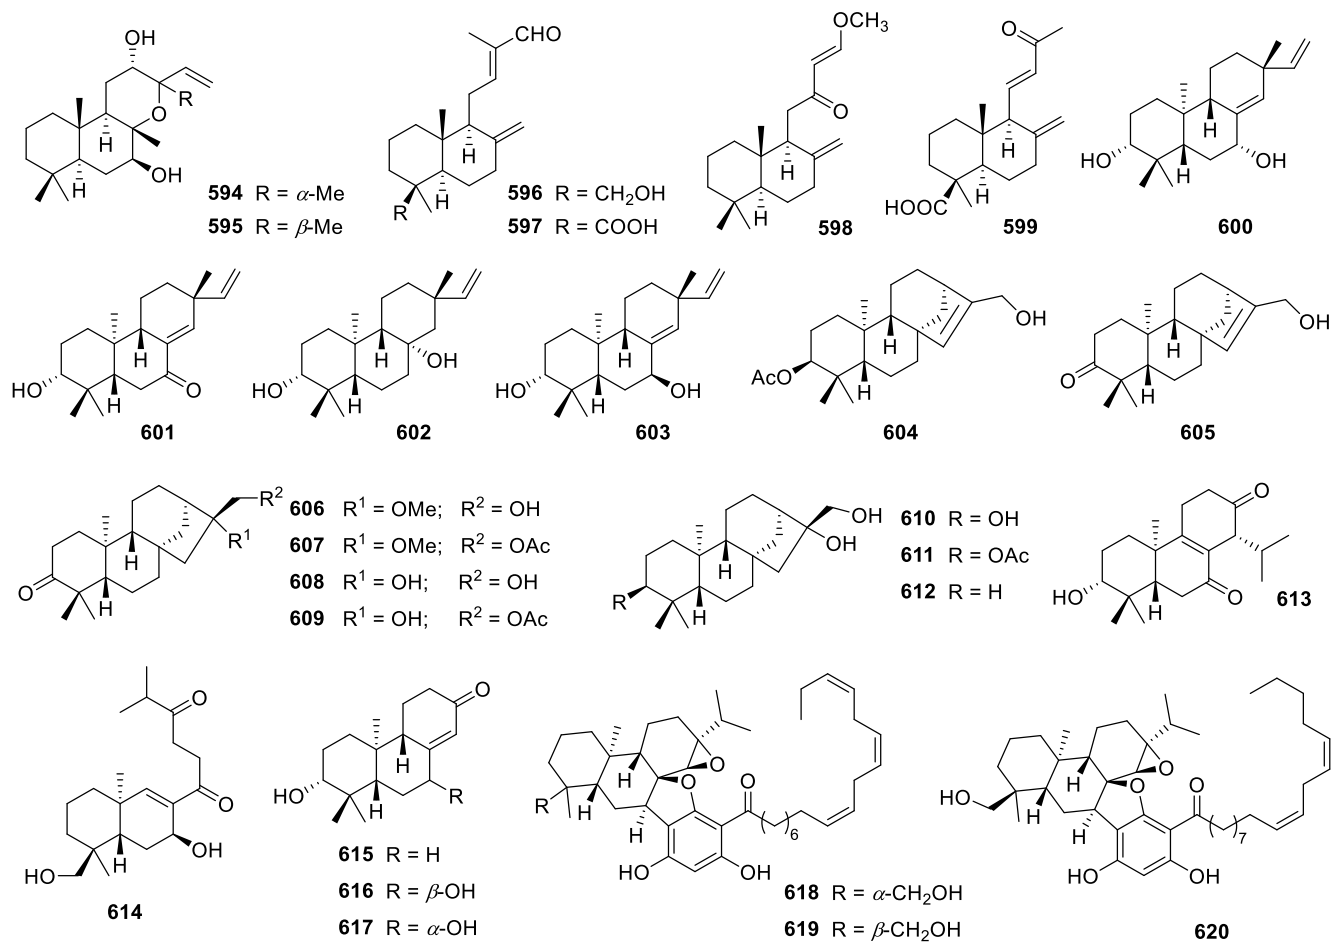

**Fig. S10** Diterpenoids (532–620) identified from Chloranthaceae.

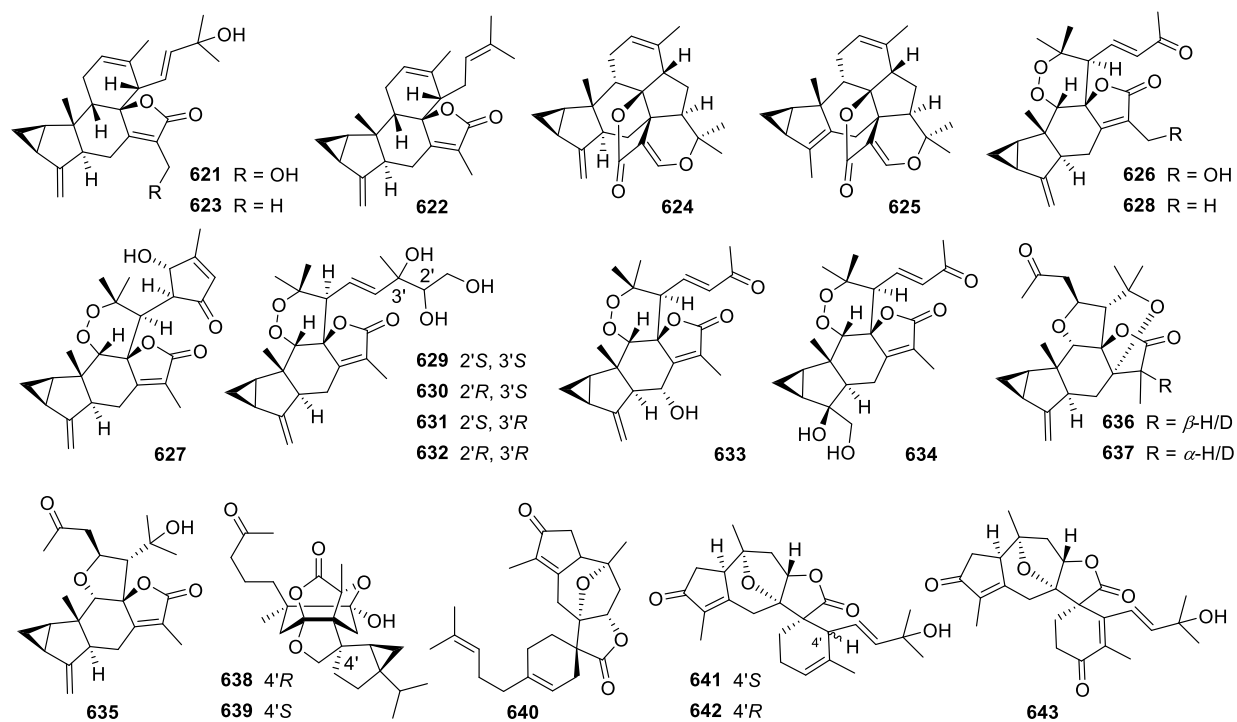

**Fig. S11** Sesquiterpenoid-monoterpenoid heterodimers (**621–643**) identified from Chloranthaceae.

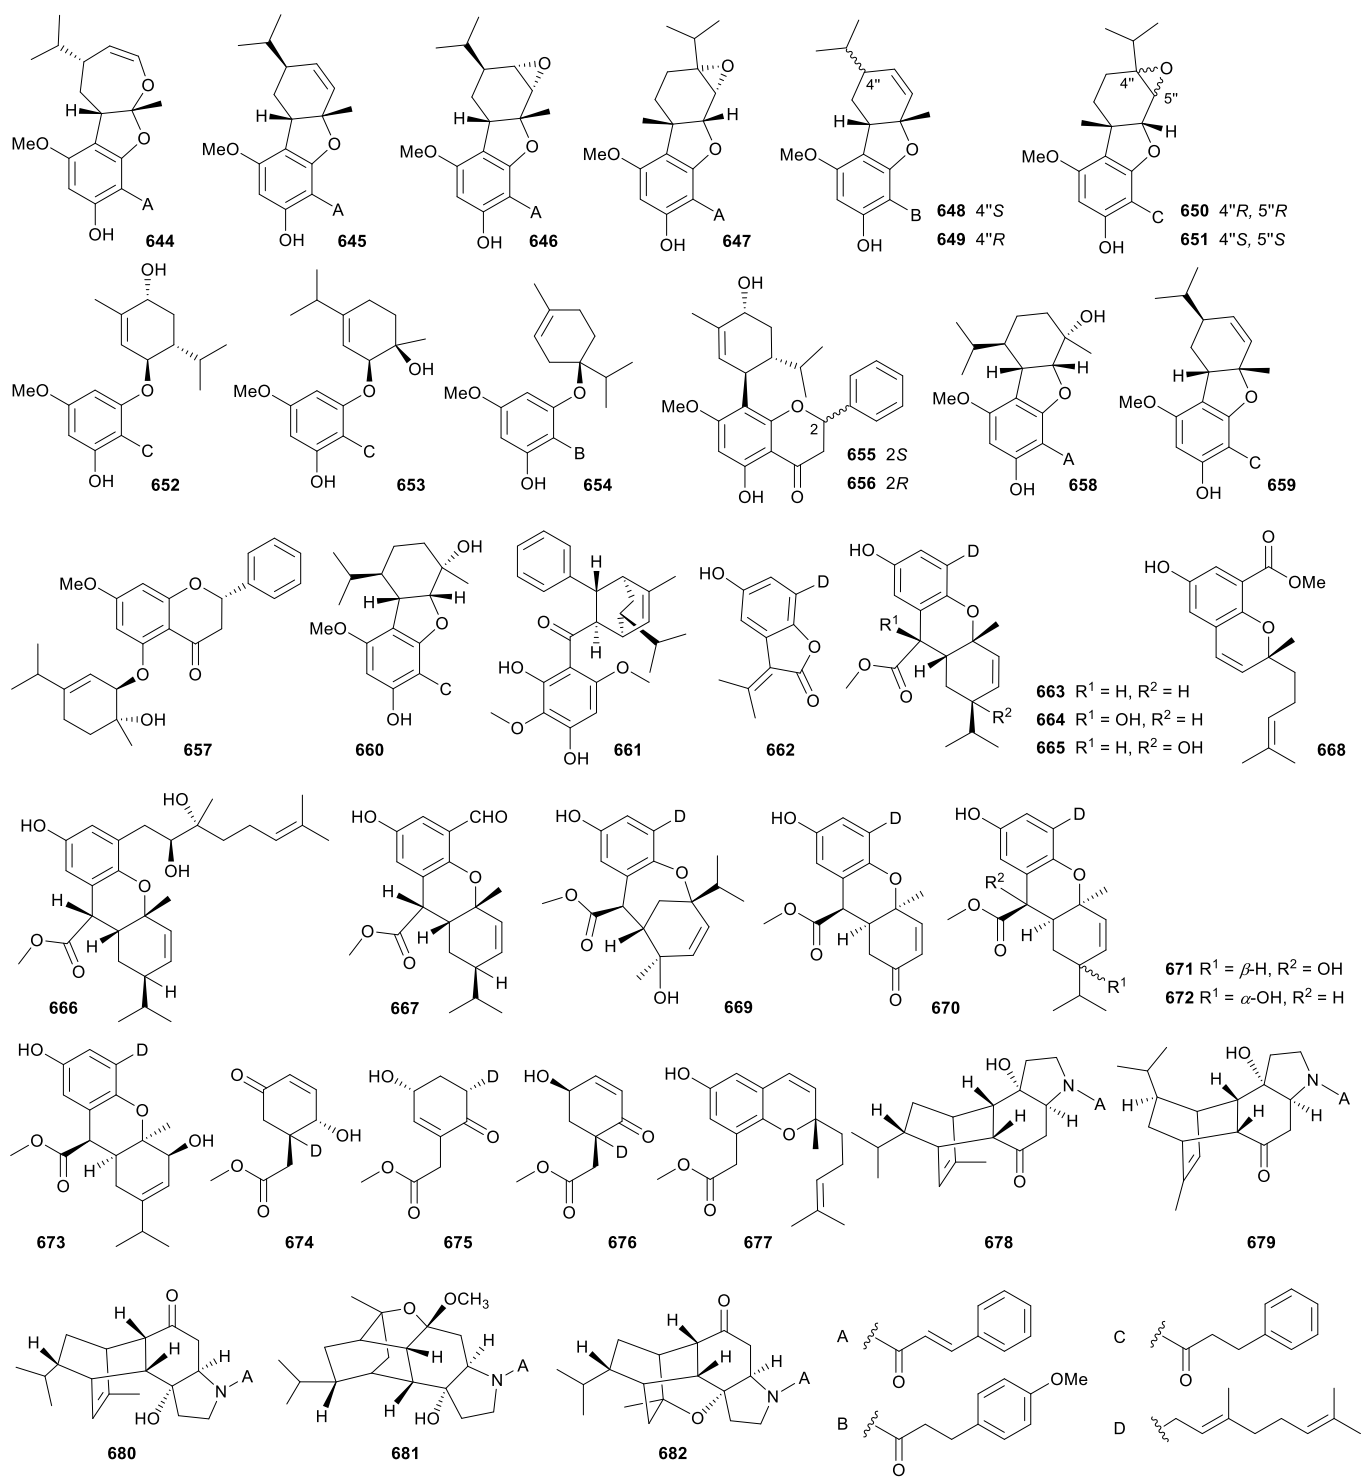

**Fig. S12** Meroterpenoids (644–682) identified from Chloranthaceae.

## References

- 1 M. Radice, A. Tasambay, A. Perez, K. Dieguez-Santana, G. Sacchetti, P. Buso, R. Buzzi, S. Vertuani, S. Manfredini and A. Baldisserotto, *J. Ethnopharmacol.*, 2019, **244**, 111932.
- 2 Y. L. Zeng, J. Y. Liu, Q. Zhang, X. H. Qin, Z. L. Li, G. J. Sun and S. R. Jin, *Front. Pharmacol.*, 2021, **12**, 652926.
- 3 Q. Yang, A. Jia, X. Liu, S. Han and S. Fan, *Planta Med.*, 2022, **88**, 455-465.
- 4 Q.-Q. Lu, X.-W. Shi, S.-J. Zheng, J.-H. Zhou, X.-A. Cui and J.-M. Gao, *Nat. Prod. Res.*, 2016, **30**, 2476-2482.
- 5 M. Zhang, J.-S. Wang, P.-R. Wang, M. Oyama, J. Luo, T. Ito, M. Inuma and L.-Y. Kong, *Fitoterapia*, 2012, **83**, 1604-1609.
- 6 B. Wu, S. He, X. D. Wu, D. K. Wu and Y. J. Pan, *Helv. Chim. Acta*, 2007, **90**, 1586-1592.
- 7 Y. M. Luo, A. H. Liu, B. W. Yu, L. J. Kang and L. Q. Huang, *Chin. Pharm. J.*, 2005, **40**, 1296-1298.
- 8 Y.-M. Luo, A.-H. Liu, D.-M. Zhang and L.-Q. Huang, *J. Asian Nat. Prod. Res.*, 2005, **7**, 829-834.
- 9 J. Kawabata, S. Tahara, J. Mizutani, A. Furusaki, N. Hashiba and T. Matsumoto, *Agric. Biol. Chem.*, 1979, **43**, 885-887.
- 10 B. Wu, S. He and Y. Pan, *Tetrahedron Lett.*, 2007, **48**, 453-456.
- 11 S. Qian and G. Zhao, *Chem. Commun.*, 2012, **48**, 3530-3532.
- 12 J. Kawabata, S. Tahara and J. Mizutani, *Agric. Biol. Chem.*, 1981, **45**, 1447-1453.
- 13 H. X. Kuang, Y. G. Xia, B. Y. Yang, Q. H. Wang and S. W. Lu, *Chem. Biodivers.*, 2008, **5**, 1736-1742.
- 14 X.-R. Hu, J.-S. Yang and X.-D. Xu, *Chem. Pharm. Bull.*, 2009, **57**, 418-420.
- 15 M. Uchida, Y. Koike, G. Kusano, Y. Kondo, N. Shigeo, C. Kabuto and T. Takemoto, *Chem. Pharm. Bull.*, 1980, **28**, 92-102.
- 16 Y. Li, D.-M. Zhang, J.-B. Li, S.-S. Yu, Y. Li and Y.-M. Luo, *J. Nat. Prod.*, 2006, **69**, 616-620.
- 17 H. Okamura, N. Nakashima, T. Iwagawa, N. Nakayama and M. Nakatani, *Chem. Lett.*, 1994, **1994**, 1541-1542.
- 18 Y.-Y. Fan, L.-S. Gan, S.-X. Chen, Q. Gong, H.-Y. Zhang and J.-M. Yue, *J. Org. Chem.*, 2021, **86**, 11277-11283.
- 19 G. Yue, L. Yang, C. Yuan, X. Jiang and B. Liu, *Org. Lett.*, 2011, **13**, 5406-5408.
- 20 G. Z. Yue, L. Yang, C. C. Yuan, B. Du and B. Liu, *Tetrahedron*, 2012, **68**, 9624-9637.
- 21 B. Du, Z. S. Huang, X. Wang, T. Chen, G. Shen, S. M. Fu and B. Liu, *Nat. Commun.*, 2019, **10**, 1892.
- 22 J. L. Wu, Y. S. Lu, B. C. Tang and X. S. Peng, *Nat. Commun.*, 2018, **9**, 4040.
- 23 X. Q. Li, J. Shen, Y. Y. Jiang, T. Shen, L. You, X. B. Sun, X. D. Xu, W. C. Hu, H. F. Wu and G. C. Wang, *Int. J. Mol. Sci.*, 2016, **17**, 1938.
- 24 O. Hiroaki, I. Tetsuo and N. Munehiro, *Bull. Chem. Soc. Jpn.*, 1995, **68**, 3465-3467.
- 25 Y. Takeda, H. Yamashita, T. Matsumoto and H. Terao, *Phytochemistry*, 1993, **33**, 713-715.
- 26 W.-Y. Tsui and G. D. Brown, *Phytochemistry*, 1996, **43**, 819-821.
- 27 J. E. Heo, J. L. Jin, Y. Y. Lee and H. S. Yun-Choi, *Nat. Prod. Sci.*, 2005, **11**, 41-44.
- 28 H. Yan, X. H. Li, X. F. Zheng, C. L. Sun and H. Y. Liu, *Helv. Chim. Acta*, 2013, **96**, 1386-1391.
- 29 J.-J. Zhao, Y.-Q. Guo, D.-P. Yang, X. Xue, Q. Liu, L.-P. Zhu, S. Yin and Z.-M. Zhao, *J. Nat. Prod.*, 2016, **79**, 2257-2263.
- 30 X.-H. Li, H. Yan, W. Ni, X.-J. Qin, Q. Zhao, Z.-Q. Ji and H.-Y. Liu, *Phytochemistry Lett.*, 2016, **15**, 199-203.
- 31 Q.-H. Wang, H.-X. Kuang, B.-Y. Yang, Y.-G. Xia, J.-S. Wang and L.-Y. Kong, *J. Nat. Prod.*, 2011, **74**, 16-20.
- 32 R. Lin, R. H. Sun, T. Xiao, S. Y. Pei, Q. Zhang, Y. X. Cheng, X. W. Guo, Z. Y. Yang, X. T. Gu and F. B. Zhang, *Arab. J. Chem.*, 2022, **15**, 104100.
- 33 S. Tahara, Y. Fukushi, J. Kawabata and J. Mizutani, *Agric. Biol. Chem.*, 1981, **45**, 1511-1512.
- 34 J. Kawabata and J. Mizutani, *Agric. Biol. Chem.*, 1989, **53**, 203-207.
- 35 X. C. Wang, L. L. Wang, X. W. Ouyang, S. P. Ma, J. H. Liu and L. H. Hu, *Helv. Chim. Acta*, 2009, **92**, 313-320.
- 36 J. Xu, H.-L. Zhu, J. Zhang, T. Du, E.-Y. Guo, W.-Y. Liu, J.-G. Luo, F. Ye, F. Feng and W. Qu, *J. Nat. Prod.*, 2018, **81**, 1391-1398.
- 37 Z. C. Zhan, Z. N. Wu, Q. Tang, C. J. Li, W. Z. Wang, J. H. Zhang, X. F. Zhuo, Y. B. Zhang, G. C. Wang and Y. L. Li, *Chin. J. Chem.*, 2021, **39**, 1168-1174.
- 38 L. Acebey, V. Jullian, D. Sereno, S. Chevalley, Y. Estevez, C. Moulis, S. Beck, A. Valentin, A. Gimenez and M. Sauvain, *Planta Med.*, 2010, **76**, 365-368.

- 39 A. P. Trentin, A. R. Santos, A. Guedes, M. G. Pizzolatti, R. A. Yunes and J. B. Calixto, *Planta Med.*, 1999, **65**, 517–521.
- 40 L. M. Guamán-Ortiz, N. Bailon-Moscoso, V. Morocho, D. Vega-Ojeda, F. Gordillo and A. I. Suárez, *Nat. Prod. Res.*, 2021, **35**, 3151–3155.
- 41 C. C. Yuan, B. Du, L. Yang and B. Liu, *J. Am. Chem. Soc.*, 2013, **135**, 9291–9294.
- 42 B. Du, C. C. Yuan, T. Z. Yu, L. Yang, Y. Yang, B. Liu and S. Qin, *Chem. Eur. J.*, 2014, **20**, 2613–2622.
- 43 X.-F. He, S. Yin, Y.-C. Ji, Z.-S. Su, M.-Y. Geng and J.-M. Yue, *J. Nat. Prod.*, 2010, **73**, 45–50.
- 44 S. Qian and G. Zhao, *Tetrahedron*, 2013, **69**, 11169–11173.
- 45 S. Ramesh and G. Mehta, *Tetrahedron Lett.*, 2015, **56**, 3941–3944.
- 46 J. M. Eagan, M. Hori, J. Wu, K. S. Kanyiva and S. A. Snyder, *Angew. Chem., Int. Ed.*, 2015, **54**, 7842–7846.
- 47 G. Ni, H. Zhang, H.-C. Liu, S.-P. Yang, M.-Y. Geng and J.-M. Yue, *Tetrahedron*, 2013, **69**, 564–569.
- 48 L.-P. Zhu, Y. Li, J.-Z. Yang, L. Zuo and D.-M. Zhang, *J. Asian Nat. Prod. Res.*, 2008, **10**, 541–545.
- 49 D. T. Oanh, P. T. Ky, N. T. B. Hang, P. H. Yen, T. H. Hanh, N. X. Cuong, D. Vu Luong, C. Van Minh and P. Van Kiem, *Nat. Prod. Commun.*, 2010, **5**, 1934578X1000501102.
- 50 M. Zhang, J.-S. Wang, M. Oyama, J. Luo, C. Guo, T. Ito, M. Inuma and L.-Y. Kong, *J. Asian Nat. Prod. Res.*, 2012, **14**, 708–712.
- 51 C.-S. Jiang, Y.-Q. Guo, S. Yin, H. Zhang and G.-H. Tang, *J. Asian Nat. Prod. Res.*, 2019, **21**, 377–383.
- 52 T. T. Huong, N. Van Thong, T. T. Minh, L. H. Tram, N. T. Anh, H. D. Cuong, P. Van Cuong and D. V. Ca, *Lett. Org. Chem.*, 2014, **11**, 639–642.
- 53 J. Chi, S. S. Wei, H. L. Gao, D. Q. Xu, L. N. Zhang, L. Yang, W. J. Xu, J. Luo and L. Y. Kong, *J. Org. Chem.*, 2019, **84**, 9117–9126.
- 54 X.-J. Wang, S.-Z. Yu, J.-L. Xin, L.-L. Pan, J. Xiong and J.-F. Hu, *Fitoterapia*, 2022, **156**, 105068.
- 55 X.-Y. Xie, Y.-X. Yang, X. Gao, Q. Liu, Z.-H. Liu, X.-F. Niu and X. Liu, *J. Asian Nat. Prod. Res.*, 2022, **24**, 731–737.
- 56 Y. M. Luo, Y. D. Luo, F. Y. Chen, J. J. Fu and H. Liu, *Adv. Mat. Res.*, 2014, **1033**, 287–290.
- 57 C. J. Liu, G. H. Li, R. Huang, Y. Z. Li and W. B. Ding, *Biochem. Syst. Ecol.*, 2015, **58**, 30–33.
- 58 S. P. Yang, C. R. Zhang, H. D. Chen, S. G. Liao and J. M. Yue, *Chin. J. Chem.*, 2007, **25**, 1892–1895.
- 59 S. P. Yang, H. D. Chen and J. M. Yue, *Chin. J. Chem.*, 2012, **30**, 1243–1248.
- 60 Y.-T. Li, S.-F. Li, C. Lei, J.-Q. You, J.-C. Huang and A.-J. Hou, *Bioorg. Chem.*, 2022, **124**, 105821.
- 61 B. Wu, L. Gan and H. Qu, *J. Nat. Prod.*, 2010, **73**, 1069–1074.
- 62 B. Wu, S. He, X. D. Wu and Y. J. Pan, *Chem. Biodivers.*, 2008, **5**, 1298–1303.
- 63 T. Yuan, C.-R. Zhang, S.-P. Yang, S. Yin, W.-B. Wu, L. Dong and J.-M. Yue, *J. Nat. Prod.*, 2008, **71**, 2021–2025.
- 64 F. Teng, H. M. Zhong, C. X. Chen and H. Y. Liu, *Helv. Chim. Acta*, 2009, **92**, 1298–1303.
- 65 X. W. Gan, L. Ma, Q. G. Chen, Q. Q. Chen, Q. Yu and L. H. Hu, *Planta Med.*, 2009, **75**, 1344–1348.
- 66 Y. Y. Wang, Q. R. Li, J. Chi, J. X. Li, L. Y. Kong and J. Luo, *Chin. J. Nat. Med.*, 2022, **20**, 215–220.
- 67 J. J. Fu, J. J. Yu, J. Chen, H. J. Xu, Y. M. Luo and H. Lu, *Phytomedicine*, 2018, **49**, 23–31.
- 68 P.-L. Fang, H.-Y. Liu and H.-M. Zhong, *Chin. J. Nat. Med.*, 2012, **10**, 24–27.
- 69 C. Wang, Y. Li, C. J. Li, S. S. Yu and D. M. Zhang, *Chin. Chem. Lett.*, 2012, **23**, 823–826.
- 70 S. K. Amoah, E. Kouloura, L. M. Dutra, A. Barison, L. M. Wildner, M. L. Bazzo, M. Halabalaki, L. A. Skaltsounis and M. W. Biavatti, *Phytochemistry Lett.*, 2015, **13**, 267–274.
- 71 H.-Y. Liu, X.-H. Ran, N.-B. Gong, W. Ni, X.-J. Qin, Y.-Y. Hou, Y. Lü and C.-X. Chen, *Phytochemistry*, 2013, **88**, 112–118.
- 72 M. Zhang, M. Inuma, J.-S. Wang, M. Oyama, T. Ito and L.-Y. Kong, *J. Nat. Prod.*, 2012, **75**, 694–698.
- 73 Z.-Y. Xiao, X.-C. Wang, G.-P. Zhang, Z.-L. Huang and L.-H. Hu, *Helv. Chim. Acta*, 2010, **93**, 803–810.
- 74 J. Kawabata, Y. Fukushi, S. Tahara and J. Mizutani, *Agric. Biol. Chem.*, 1984, **48**, 713–717.
- 75 B. Wu, H. B. Qu and Y. Y. Cheng, *Helv. Chim. Acta*, 2008, **91**, 725–733.
- 76 Z.-G. Zhuo, Z.-Y. Cheng, J. Ye, H.-L. Li, X.-K. Xu, N. Xie, W.-D. Zhang and Y.-H. Shen, *Phytochemistry Lett.*, 2017, **20**, 133–138.

- 77 W. Hui-Kang, H. Kan and M. Quan-Ming, *Chin. Tradit. Herb. Drugs.*, 1991, **22**, 195–197.
- 78 B. Wu, S. He, X.-D. Wu and Y.-J. Pan, *Planta Med.*, 2006, **72**, 1334–1338.
- 79 W. Wang, B. Chen, R. L. Zou, X. Y. Tu, S. L. Tan, H. Lu, Z. J. Liu and J. J. Fu, *Int. J. Oncol.*, 2014, **45**, 1891–1900.
- 80 S. Yaermainaiti, P. Wang, J. Luo, R.-J. Li and L.-Y. Kong, *Fitoterapia*, 2016, **111**, 7–11.
- 81 Y. J. Xu, C. P. Tang, M. J. Tan, C. Q. Ke, T. Wu and Y. Ye, *Chem. Biodivers.*, 2010, **7**, 151–157.
- 82 Z.-S. Su, S. Yin, Z.-W. Zhou, Y. Wu, J. Ding and J.-M. Yue, *J. Nat. Prod.*, 2008, **71**, 1410–1413.
- 83 D. Y. Zhang, Y. R. Hu, H. Yang, Y. N. Wang, S. Liu, Y. H. Zou, J. J. Zhou, P. Y. Zhuang, X. X. Wang and H. Liu, *Chin. J. Chem.*, 2023, **41**, 1209–1225.
- 84 X.-C. Wang, W.-Q. Wu, S.-P. Ma, J.-H. Liu and L.-H. Hu, *Chin. J. Nat. Med.*, 2008, **6**, 404–407.
- 85 W. M. Huang, Y. T. Bian, F. Y. Chen, T. J. Ning, Z. Y. Zhu, Z. C. Chen and Y. M. Luo, *Phytochemistry*, 2022, **193**, 113001.
- 86 X. Z. Yang, C. Wang, J. Yang, D. R. Wan, Q. X. Lin, G. Z. Yang, Z. N. Mei and Y. J. Feng, *Tetrahedron Lett.*, 2014, **55**, 5632–5634.
- 87 Q. S. Liu, R. Deng, Q. F. Yan, L. Cheng, Y. M. Luo, K. Q. Li, X. Y. Yin and X. Y. Qin, *ACS Appl. Mater. Interfaces*, 2017, **9**, 5725–5732.
- 88 H. Lu, J. Chen, Y. M. Luo, H. J. Xu, L. Xiong and J. J. Fu, *Int. J. Oncol.*, 2018, **53**, 2695–2704.
- 89 W.-M. Huang, F.-Y. Chen, Y.-T. Bian, T.-J. Ning, Z.-C. Chen, P.-C. Shuang and Y.-M. Luo, *Nat. Prod. Res.*, 2022, **36**, 5255–5262.
- 90 J. B. Xu, J. Yu, W. Q. Zhang, C. G. Zhu, H. W. Guo, S. H. Feng, P. Yi, H. Luo and C. Yan, *J. Asian Nat. Prod. Res.*, 2023, **25**, 330–341.
- 91 N. H. Yim, E. I. Hwang, B. S. Yun, K. D. Park, J. S. Moon, S. H. Lee, N. Do Sung and S. U. Kim, *Biol. Pharm. Bull.*, 2008, **31**, 1041–1044.
- 92 X. Wang, W.-B. Sun, J.-P. Zou, G.-Q. Lin and B.-F. Sun, *Org. Biomol. Chem.*, 2016, **14**, 10581–10584.
- 93 G. Blay, V. BARGUES, L. Cardona, B. García and J. R. Pedro, *J. Org. Chem.*, 2000, **65**, 6703–6707.
- 94 F.-Y. Chen, W.-W. Yu, F.-X. Lin, J.-W. Huang, W.-M. Huang, P.-C. Shuang, Y.-T. Bian and Y.-M. Luo, *Fitoterapia*, 2021, **151**, 104871.
- 95 K.-Y. Wang, Y. Li, S.-L. Zhang, J.-H. Chen and Z. Yang, *Tetrahedron Lett.*, 2022, **102**, 153946.
- 96 W.-B. Sun, X. Wang, B.-F. Sun, J.-P. Zou and G.-Q. Lin, *Org. Lett.*, 2016, **18**, 1219–1221.
- 97 C. Y. Zheng, J. X. Zhao, C. H. Yuan, X. Peng, M. Y. Geng, J. Ai, Y. Y. Fan and J. M. Yue, *Chem. Sci.*, 2023, **14**, 13410–13418.
- 98 G.-W. Rao, Z.-J. Zhan, C.-P. Li and W.-G. Shan, *J. Chem. Res.*, 2010, **34**, 697–698.
- 99 S. Bercion, J.-P. Baltaze and P. Bourgeois, *Fitoterapia*, 2005, **76**, 620–624.
- 100 S. K. Amoah, F. L. de Oliveira, A. C. H. da Cruz, N. M. de Souza, F. R. Campos, A. Barison and M. W. Biavatti, *Phytochemistry*, 2013, **87**, 126–132.
- 101 A. E. Gonçalves, C. Bürger, S. K. S. Amoah, R. Tolardo, M. W. Biavatti and M. M. de Souza, *Eur. J. Pharmacol.*, 2012, **674**, 307–314.
- 102 S. Zhang, Z.-S. Su, S.-P. Yang and J.-M. Yue, *J. Asian Nat. Prod. Res.*, 2010, **12**, 522–528.
- 103 L. J. Wang, J. Xiong, S. T. Liu, X. H. Liu and J. F. Hu, *Chem. Biodivers.*, 2014, **11**, 919–928.
- 104 F.-Y. Chen, H.-T. Li, C.-J. Li, J. Chen, J.-W. Huang, C. Li and Y.-M. Luo, *Fitoterapia*, 2020, **141**, 104472.
- 105 J. Kawabata, Y. Fukushi, S. Tahara and J. Mizutani, *Agric. Biol. Chem.*, 1985, **49**, 1479–1485.
- 106 K. Foo, I. Usui, D. C. G. Goetz, E. W. Werner, D. Holte and P. S. Baran, *Angew. Chem., Int. Ed.*, 2012, **51**, 11491–11495.
- 107 T. Takemoto, M. Uchida and G. Kusano, *Chem. Pharm. Bull.*, 1976, **24**, 531–533.
- 108 M. Miyashita, T. Kumazawa and A. Yoshikoshi, *J. Org. Chem.*, 1984, **49**, 3728–3732.
- 109 Z. H. Chen, Y. P. Sun, Y. Y. Wang, L. Y. Kong and J. Luo, *Nat. Prod. Res.*, 2023, **37**, 3505–3511.
- 110 H. F. Wu, X. R. Hu, X. P. Zhang, S. L. Chen, J. S. Yang and X. D. Xu, *J. Med. Plants Res*, 2012, **6**, 4501–4504.
- 111 J. Xiong, S.-T. Liu, Y. Tang, W.-X. Wang, V.-B. Bui, Y. Zhao, H. Fan, G.-X. Yang and J.-F. Hu, *Phytochemistry Lett.*, 2013, **6**, 586–589.

- 112 D. N. Tran and N. Cramer, *Chem. Eur. J.*, 2014, **20**, 10654–10660.
- 113 H. J. M. Gijzen, J. B. P. A. Wijnberg, G. A. Stork, A. de Groot, M. A. de Waard and J. G. M. van Nistelrooy, *Tetrahedron*, 1992, **48**, 2465–2476.
- 114 B. Zhou, Y. Wu, S. Dalal, E. F. Merino, Q.-F. Liu, C.-H. Xu, T. Yuan, J. Ding, D. G. I. Kingston, M. B. Cassera and J.-M. Yue, *J. Nat. Prod.*, 2017, **80**, 96–107.
- 115 B. Zhou, Q.-F. Liu, S. Dalal, M. B. Cassera and J.-M. Yue, *Org. Lett.*, 2017, **19**, 734–737.
- 116 B. Zhou, F. M. Zimbres, J. H. Butler, C. H. Xu, R. S. Haney, Y. Wu, M. B. Cassera and J. M. Yue, *Sci. China Chem.*, 2022, **65**, 82–86.
- 117 G. X. Huang, Z. S. Huang, X. J. Ma, Z. H. Feng, F. S. Yuan, S. Qin, S. M. Fu and B. Liu, *Org. Chem. Front.*, 2023, **10**, 3591–3597.
- 118 P. Wang, J. Luo, Y.-M. Zhang and L.-Y. Kong, *Tetrahedron*, 2015, **71**, 5362–5370.
- 119 X.-C. Wang, Y.-N. Zhang, L.-L. Wang, S.-P. Ma, J.-H. Liu and L.-H. Hu, *J. Nat. Prod.*, 2008, **71**, 674–677.
- 120 J. Kawabata, E. Fukushi and J. Mizutani, *Phytochemistry*, 1995, **39**, 121–125.
- 121 J. Kawabata and J. Mizutani, *Phytochemistry*, 1992, **31**, 1293–1296.
- 122 K. Tae Hoon, L. Yun Mi, L. Won Jung, H. Eui Il, P. Ki Duk, C. Gyang Ja, M. Jae Sun and P. Ho-Yong, *J. Microbiol. Biotechnol.*, 2017, **27**, 1272–1275.
- 123 Z.-G. Zhuo, G.-Z. Wu, X. Fang, X.-H. Tian, H.-Y. Dong, X.-K. Xu, H.-L. Li, N. Xie, W.-D. Zhang and Y.-H. Shen, *Fitoterapia*, 2017, **119**, 90–99.
- 124 Z. C. Zhan, Y. P. Xia, Q. Tang, H. H. Zhu, J. Y. Du, J. X. Cai, Y. J. Chen, Z. N. Wu, Y. L. Li, N. H. Chen, G. C. Wang and Y. B. Zhang, *Phytochemistry* 2023, **215**, 113859.
- 125 P.-L. Fang, Y.-L. Cao, H. Yan, L.-L. Pan, S.-C. Liu, N.-B. Gong, Y. Lü, C.-X. Chen, H.-M. Zhong, Y. Guo and H.-Y. Liu, *J. Nat. Prod.*, 2011, **74**, 1408–1413.
- 126 L. Yu and H. R. Zhu. Application of shizukaol M in preparing sensitizer of antitumor drug. CN106913566, 2017.
- 127 S.-P. Yang, Z.-B. Gao, Y. Wu, G.-Y. Hu and J.-M. Yue, *Tetrahedron*, 2008, **64**, 2027–2034.
- 128 C.-J. Li, D.-M. Zhang, Y.-M. Luo, S.-S. Yu, Y. Li and Y. Lu, *Phytochemistry*, 2008, **69**, 2867–2874.
- 129 Y. M. Lee, J. S. Moon, B.-S. Yun, K. D. Park, G. J. Choi, J.-C. Kim, S. H. Lee and S. U. Kim, *J. Agric. Food Chem.*, 2009, **57**, 5750–5755.
- 130 C. C. Yuan, B. Du, H. P. Deng, Y. Man and B. Liu, *Angew. Chem., Int. Ed.*, 2017, **56**, 637–640.
- 131 H. Yan, M.-Y. Ba, X.-H. Li, J.-M. Guo, X.-J. Qin, L. He, Z.-Q. Zhang, Y. Guo and H.-Y. Liu, *Fitoterapia*, 2016, **115**, 64–68.
- 132 L. S. Tang, H. R. Zhu, X. M. Yang, F. Xie, J. T. Peng, D. K. Jiang, J. Xie, M. Y. Qi and L. Yu, *PLoS One*, 2016, **11**, e0152012.
- 133 R. K. Hu, H. Yan, X. J. Hao, H. Y. Liu and J. R. Wu, *PLoS One*, 2013, **8**, e73527.
- 134 O. E. Kwon, H. S. Lee, S. W. Lee, K. Bae, K. Kim, M. Hayashi, M.-C. Rho and Y.-K. Kim, *J. Ethnopharmacol.*, 2006, **104**, 270–277.
- 135 P. J. Guo, T. Chen, X. G. Hu, Y. L. Duan, L. Zheng, G. X. Du, Q. Wang, A. X. Ding, G. Q. Qin, Y. H. Chen, W. Q. Wang, Q. Mu and L. J. Xuan, *Bioorg. Chem.*, 2024, **142**, 106958.
- 136 L.-L. Pan, P. Xu, X.-L. Luo, L.-J. Wang, S.-Y. Liu, Y.-Z. Zhu, J.-F. Hu and X.-H. Liu, *Biomed. Pharmacother.*, 2017, **88**, 878–884.
- 137 S.-Y. Kim, Y. Kashiwada, K. Kawazoe, K. Murakami, H.-D. Sun, S.-L. Li and Y. Takaishi, *Tetrahedron Lett.*, 2009, **50**, 6032–6035.
- 138 J. Kawabata, Y. Fukushi, S. Tahara and J. Mizutani, *Phytochemistry*, 1990, **29**, 2332–2334.
- 139 P. F. Tang, Q. R. Li, S. T. Liao, S. S. Wei, L. T. Cui, W. J. Xu, D. R. Zhu, J. Luo and L. Y. Kong, *Phytomedicine*, 2021, **82**, 153472.
- 140 Z. S. Huang, G. X. Huang, X. Wang, S. Qin, S. M. Fu and B. Liu, *Angew. Chem., Int. Ed.*, 2022, **61**, e202204303.
- 141 Y.-J. Xu, C.-P. Tang, C.-Q. Ke, J.-B. Zhang, H.-C. Weiss, E.-R. Gesing and Y. Ye, *J. Nat. Prod.*, 2007, **70**, 1987–1990.

- 142 X.-R. Yang, N. Tanaka, D. Tsuji, F.-L. Lu, X.-J. Yan, K. Itoh, D.-P. Li and Y. Kashiwada, *Tetrahedron Lett.*, 2020, **61**, 151916.
- 143 S.-P. Yang, Z.-B. Gao, F.-D. Wang, S.-G. Liao, H.-D. Chen, C.-R. Zhang, G.-Y. Hu and J.-M. Yue, *Org. Lett.*, 2007, **9**, 903–906.
- 144 S.-P. Yang and J.-M. Yue, *Tetrahedron Lett.*, 2006, **47**, 1129–1132.
- 145 S.-Y. Kim, Y. Kashiwada, K. Kawazoe, K. Murakami, H.-D. Sun, S.-L. Li and Y. Takaishi, *Phytochemistry Lett.*, 2009, **2**, 110–113.
- 146 S.-Y. Kim, Y. Kashiwada, K. Kawazoe, K. Murakami, H.-D. Sun, S.-L. Li and Y. Takaishi, *Chem. Pharm. Bull.*, 2011, **59**, 1281–1284.
- 147 Y.-Q. Guo, J.-J. Zhao, Z.-Z. Li, G.-H. Tang, Z.-M. Zhao and S. Yin, *Bioorg. Med. Chem. Lett.*, 2016, **26**, 3163–3166.
- 148 B. Wu, J. Chen, H. B. Qu and Y. Y. Cheng, *J. Nat. Prod.*, 2008, **71**, 877–880.
- 149 C.-P. Shen, J.-G. Luo, M.-H. Yang and L.-Y. Kong, *Phytochemistry*, 2017, **137**, 117–122.
- 150 S. Zhang, S.-P. Yang, T. Yuan, B.-D. Lin, Y. Wu and J.-M. Yue, *Tetrahedron Lett.*, 2010, **51**, 764–766.
- 151 X.-X. Bian, X. Zhao, S.-S. Liu, L. Wu, X.-W. Yin and C.-P. Shen, *Fitoterapia*, 2022, **159**, 105191.
- 152 X.-F. He, S. Zhang, R.-X. Zhu, S.-P. Yang, T. Yuan and J.-M. Yue, *Tetrahedron*, 2011, **67**, 3170–3174.
- 153 Y. Y. Wang, Z. H. Chen, Q. R. Li, L. T. Cui, J. Chi, J. X. Li, Y. P. Sun, L. Y. Kong and J. Luo, *Tetrahedron Lett.*, 2022, **98**, 153834.
- 154 L.-G. Xiao, P. Li, H. Yan, W. Ni, L. He and H.-Y. Liu, *Org. Biomol. Chem.*, 2022, **20**, 1320–1326.
- 155 X.-H. Ran, F. Teng, C.-X. Chen, G. Wei, X.-J. Hao and H.-Y. Liu, *J. Nat. Prod.*, 2010, **73**, 972–975.
- 156 Y. P. Sun, Y. Q. Li, L. T. Cui, Q. R. Li, S. Y. Wang, Z. H. Chen, L. Y. Kong and J. Luo, *J. Agric. Food Chem.*, 2023, **71**, 14000–14012.
- 157 S. Y. Wang, Y. Q. Li, X. L. Wang, X. Q. Zhang, F. Xu, P. Ying, L. Y. Kong and J. Luo, *Fitoterapia*, 2023, **168**, 105547.
- 158 Y. P. Sun, J. Chi, L. J. Zhang, S. Y. Wang, Z. H. Chen, H. Zhang, L. Y. Kong and J. Luo, *J. Org. Chem*, 2022, **87**, 4323–4332.
- 159 D.-Y. Zhang, X.-X. Wang, Y.-N. Wang, M. Wang, P.-Y. Zhuang, Y. Jin and H. Liu, *Org. Chem. Front.*, 2021, **8**, 4374–4386.
- 160 J. Chi, W. J. Xu, S. S. Wei, X. B. Wang, J. X. Li, H. L. Gao, L. Y. Kong and J. Luo, *Org. Lett.*, 2019, **21**, 789–792.
- 161 B. Bai, S.-X. Ye, D.-P. Yang, L.-P. Zhu, G.-H. Tang, Y.-Y. Chen, G. Q. Li and Z.-M. Zhao, *J. Nat. Prod.*, 2019, **82**, 407–411.
- 162 J. X. Li, J. Chi, P. F. Tang, Y. P. Sun, W. J. Lu, W. J. Xu, Y. Y. Wang, J. Luo and L. Y. Kong, *Chin. J. Chem.*, 2022, **40**, 603–608.
- 163 J. Kawabata, E. Fukushi and J. Mizutani, *Phytochemistry*, 1993, **32**, 1347–1349.
- 164 J. J. Qin, H. Z. Jin, J. J. Fu, X. J. Hu, Y. Wang, S. K. Yan and W. D. Zhang, *Bioorg. Med. Chem. Lett.*, 2009, **19**, 710–713.
- 165 B. Yang, Y. M. Hu, N. B. Cheng, Z. Z. Su, Y. Zhong, Z. Y. Cao, L. Cao, W. Z. Huang, Z. Z. Wang and W. Xiao, *Phytochemistry*, 2020, **173**, 112223.
- 166 H. Yan, X.-J. Qin, X.-H. Li, Q. Yu, W. Ni, L. He and H.-Y. Liu, *Tetrahedron Lett.*, 2019, **60**, 713–717.
- 167 J. X. Li, Z. R. Cui, Y. Y. Li, C. H. Han, Y. q. Zhang, P. F. Tang, L. T. Cui, H. Zhang, J. Luo and L. Y. Kong, *Chin. Chem. Lett.*, 2022, **33**, 4257–4260.
- 168 G. Kusano, M. Abe, Y. Koike, M. Uchida, S. Nozoe and Z. Taira, *Yakugaku Zasshi*, 1991, **111**, 756–764.
- 169 J. Kawabata, E. Fukushi and J. Mizutani, *Phytochemistry*, 1998, **47**, 231–235.
- 170 X. Wang, Z. Wang, X. Ma, Z. Huang, K. Sun, X. Gao, S. Fu and B. Liu, *Angew. Chem., Int. Ed.*, 2022, **61**, e202200258.
- 171 Y.-Q. Guo, G.-H. Tang, Z.-Z. Li, S.-L. Lin and S. Yin, *RSC Adv.*, 2015, **5**, 103047–103051.
- 172 X.-J. Wu, D. Cao, F.-L. Chen, R.-S. Shen, J. Gao, L.-P. Bai, W. Zhang, Z.-H. Jiang and G.-Y. Zhu, *ACS Omega*, 2022, **7**, 35063–35068.
- 173 Y.-Y. Fan, Y.-L. Sun, B. Zhou, J.-X. Zhao, L. Sheng, J.-Y. Li and J.-M. Yue, *Org. Lett.*, 2018, **20**, 5435–5438.
- 174 D. Y. Zhang, J. J. Zhou, H. Yang, M. Wang, Y. N. Wang, S. Liu, Z. M. Zhang, P. Y. Zhuang, X. X. Wang and H. Liu, *J. Org. Chem*, 2022, **87**, 8623–8632.
- 175 T. Yuan, R.-X. Zhu, S.-P. Yang, H. Zhang, C.-R. Zhang and J.-M. Yue, *Org. Lett.*, 2012, **14**, 3198–3201.



- 176 S. Y. Wang, Y. P. Sun, Y. Q. Li, W. J. Xu, Q. Q. Li, Y. B. Mu, L. Y. Kong and J. Luo, *J. Org. Chem.*, 2023, **88**, 347–354.
- 177 J.-S. Zhou, Q.-F. Liu, F. M. Zimbres, J. H. Butler, M. B. Cassera, B. Zhou and J.-M. Yue, *Org. Chem. Front.*, 2021, **8**, 1795–1801.
- 178 L.-J. Wang, J. Xiong, S.-T. Liu, L.-L. Pan, G.-X. Yang and J.-F. Hu, *J. Nat. Prod.*, 2015, **78**, 1635–1646.
- 179 C. F. Xie, L. M. Sun, K. Liao, S. Liu, M. C. Wang, J. Xu, M. Bartlam and Y. Q. Guo, *J. Nat. Prod.*, 2015, **78**, 2800–2807.
- 180 J. Xiong, Z.-L. Hong, L.-X. Gao, J. Shen, S.-T. Liu, G.-X. Yang, J. Li, H. Zeng and J.-F. Hu, *J. Org. Chem.*, 2015, **80**, 11080–11085.
- 181 J. Xiong, Z.-L. Hong, P. Xu, Y. Zou, S.-B. Yu, G.-X. Yang and J.-F. Hu, *Org. Biomol. Chem.*, 2016, **14**, 4678–4689.
- 182 L.-C. Chiu, J.-Y. Wang, C.-H. Lin, C.-H. Hsu, L.-C. Lin and S.-L. Fu, *Molecules*, 2021, **26**, 6540.
- 183 L.-J. Wang, J. Xiong, C. Lau, L.-L. Pan and J.-F. Hu, *J. Asian Nat. Prod. Res.*, 2015, **17**, 1220–1230.
- 184 S. Khan, M. S. Ali, Z. Ahmed, M. Lateef, S. Yousuf, V. U. Ahmad, I. Fatima and R. B. Tareen, *Nat. Prod. Commun.*, 2017, **12**, 1934578X1701201204.
- 185 M. Zhang, J. S. Wang, J. Luo, P. R. Wang, C. Guo and L. Y. Kong, *Fitoterapia*, 2013, **91**, 95–99.
- 186 Q. Yang, A. Jia, X. Z. Liu, S. Y. Han and S. Y. Fan, *Planta Med.*, 2021, **88**, 455–465.
- 187 S.-P. Yang and J.-M. Yue, *Nat. Prod. Res.*, 2008, **22**, 1163–1168.
- 188 Y. Y. Fan, C. Y. Zheng, B. Zhou, F. M. Zimbres, M. B. Cassera and J. M. Yue, *Chin. J. Chem.*, 2023, **41**, 392–398.
- 189 Y. P. Sun, Y. Y. Wang, Y. q. Li, S. Y. Wang, D. Y. Zhang, L. Y. Kong and J. Luo, *Org. Biomol. Chem.*, 2022, **20**, 9222–9227.
- 190 L. Acebey, M. Sauvain, S. Beck, C. Moulis, A. Gimenez and V. Jullian, *Org. Lett.*, 2007, **9**, 4693–4696.
- 191 J.-P. Li, C.-C. Yuan, B. Du and B. Liu, *Chin. Chem. Lett.*, 2017, **28**, 113–116.
- 192 Y. Y. Wang, Z. R. Cui, J. Chi, P. F. Tang, M. H. Zhang, J. X. Li, Y. Y. Li, H. Zhang, J. Luo and L. Y. Kong, *Chin. J. Chem.*, 2021, **39**, 129–136.
- 193 P. Wang, R.-J. Li, R.-H. Liu, K.-L. Jian, M.-H. Yang, L. Yang, L.-Y. Kong and J. Luo, *Org. Lett.*, 2016, **18**, 832–835.
- 194 Z. R. Cui, Y. Y. Wang, J. X. Li, J. Chi, P. P. Zhang, L. Y. Kong and J. Luo, *Org. Lett.*, 2022, **24**, 9107–9111.
- 195 S.-Y. Kim, H. Nagashima, N. Tanaka, Y. Kashiwada, J. i. Kobayashi and M. Kojoma, *Org. Lett.*, 2016, **18**, 5420–5423.
- 196 C. Murakami, R. S. A. Cabral, K. S. Gomes, T. A. Costa-Silva, M. Amaral, M. Romanelli, A. G. Tempone, J. H. G. Lago, V. da S. Bolzani, P. R. H. Moreno and M. C. M. Young, *Phytochemistry Lett.*, 2019, **33**, 6–11.
- 197 X. Liu, J. Yang, J. Fu, P.-L. Xu, T.-G. Xie, L.-P. Bai, Z.-H. Jiang and G.-Y. Zhu, *Bioorg. Chem.*, 2021, **112**, 104830.
- 198 W. Q. Yang, P. Hai, H. Xiao, Y. Gao, Y. H. Tao, D. R. Miao and F. Wang, *Tetrahedron*, 2018, **74**, 341–347.
- 199 M. Bai, Y.-Y. Liu, Y.-L. Li, W.-Y. Shi, K.-X. Li, L.-W. Lu, Z. Le, L. Bin, X.-X. Huang and S.-J. Song, *Ind. Crops. Prod.*, 2022, **183**, 114983.
- 200 J. S. Zhou, S. L. Huang, Y. Gao, Q. F. Liu, Y. Leng, B. Zhou and J. M. Yue, *J. Nat. Prod.*, 2022, **85**, 2090–2099.
- 201 B. Zhou, Q. Gong, Y. Fu, J. S. Zhou, H. Y. Zhang and J. M. Yue, *Org. Lett.*, 2023, **25**, 1464–1469.
